# Supplementary material
Source: PubMed Central journal article supplement (PMC4793437)
Supplement: jonc013476.ww1_default.pdf [file jonc013476.ww1_default.pdf]

| NCT Number  | Registry Title                                                                                                            | Recruitment Status     | Published? | PMID     | Authors                                                                                                                                                         | Journal Details                                                        | Results Available at ClinicalTrials.gov? |
|-------------|---------------------------------------------------------------------------------------------------------------------------|------------------------|------------|----------|-----------------------------------------------------------------------------------------------------------------------------------------------------------------|------------------------------------------------------------------------|------------------------------------------|
| NCT00000410 | Spine Patient Outcomes Research Trial (SPORT) - Intervertebral Disc Herniation                                            | Completed              | Yes        | 17119140 | Weinstein JN, Tosteson TD, Lurie JD, Tosteson AN, Hanscom B, Skinner JS, Abdu WA, Hilibrand AS, Boden SD, Deyo RA.                                              | JAMA. 2006 Nov 22;296(20):2441-50.                                     |                                          |
| NCT00000936 | A Study To Test An Anti-Rejection Therapy After Kidney Transplantation                                                    | Active, not recruiting | Yes        | 15910382 | Benfield MR, Tejani A, Harmon WE, McDonald R, Stablein DM, McIntosh M, Rose S; CCTPT Study Group.                                                               | Pediatr Transplant. 2005 Jun;9(3):282-92.                              |                                          |
| NCT00002757 | TITLE:Less Intensive Therapy for Children With Non-Hodgkin's Lymphoma                                                     | Active, not recruiting | Yes        | 17132719 | Patte C, Auperin A, Gerrard M, Michon J, Pinkerton R, Sposto R, Weston C, Raphael M, Perkins SL, McCarthy K, Cairo MS; FAB/LMB96 International Study Committee. | Blood. 2007 Apr 1;109(7):2773-80.                                      |                                          |
| NCT00003389 | Combination Chemotherapy With or Without Radiation Therapy in Treating Patients With Hodgkin's Lymphoma                   | Active, not recruiting | No         |          |                                                                                                                                                                 |                                                                        | No                                       |
| NCT00003857 | Radiation Therapy With or Without Optional Tamoxifen in Treating Women With Ductal Carcinoma in Situ                      | Active, not recruiting | No         |          |                                                                                                                                                                 |                                                                        | No                                       |
| NCT00003958 | Combination Chemotherapy in Treating Patients With Previously Untreated Rhabdomyosarcoma                                  | Completed              | Yes        | 19770373 | Arndt CA, Stoner JA, Hawkins DS, Rodeberg DA, Hayes-Jordan AA, Paidas CN, Parham DM, Teot LA, Wharam MD, Breneman JC, Donaldson SS, Anderson JR, Meyer WH.      | J Clin Oncol. 2009 Nov 1;27(31):5182-8. Epub 2009 Sep 21.              |                                          |
| NCT00004054 | Hormone Therapy Plus Radiation Therapy With or Without Combination Chemotherapy in Treating Patients With Prostate Cancer | Active, not recruiting | Yes        | 18990504 | Rosenthal SA, Bae K, Pienta KJ, Sobczak ML, Asbell SO, Rajan R, Kerlin KJ, Michalski JM, Sandler HM; Radiation Therapy Oncology Group Trial 9902.               | Int J Radiat Oncol Biol Phys. 2009 Mar 1;73(3):672-8. Epub 2008 Nov 5. |                                          |

|             |                                                                                                                                  |                        |     |          |                                                                                                                                                                                                                                              |                                                                                          |    |
|-------------|----------------------------------------------------------------------------------------------------------------------------------|------------------------|-----|----------|----------------------------------------------------------------------------------------------------------------------------------------------------------------------------------------------------------------------------------------------|------------------------------------------------------------------------------------------|----|
| NCT00004978 | An International Study to Evaluate Recombinant Interleukin-2 (rIL-2) in HIV Positive Patients Taking Anti-retroviral Therapy     | Completed              | Yes | 20812949 | Pett SL, Carey C, Lin E, Wentworth D, Lazovski J, MirÃ³ JM, Gordin F, Angus B, Rodriguez-Barradas M, Rubio R, Tambussi G, Cooper DA, Emery S; INSIGHT-ESPRIT Study Group.                                                                    | HIV Med. 2011 Apr;12(4):219-27. doi: 10.1111/j.1468-1293.2010.00875.x. Epub 2010 Aug 31. |    |
| NCT00005581 | Combination Chemotherapy in Treating Women With Stage II or Stage III Breast Cancer                                              | Active, not recruiting | No  |          |                                                                                                                                                                                                                                              |                                                                                          | No |
| NCT00005918 | Effectiveness and Safety of Two Forms of Stavudine in HIV-Infected Patients                                                      | Completed              | No  |          |                                                                                                                                                                                                                                              |                                                                                          | No |
| NCT00006146 | Half-Dose Flu Vaccine Study in Healthy Adults                                                                                    | Completed              | Yes | 11803070 | Treanor J, Keitel W, Belshe R, Campbell J, Schiff G, Zangwill K, Wolff M, Klimov A, Levandowski R, Lambert L.                                                                                                                                | Vaccine. 2002 Jan 15;20(7-8):1099-105.                                                   |    |
| NCT00006721 | S0016 Combination Chemotherapy With Monoclonal Antibody Therapy in Treating Patients With Newly Diagnosed Non-Hodgkin's Lymphoma | Active, not recruiting | Yes | 23233710 | Press OW, Unger JM, Rimsza LM, Friedberg JW, Leblanc M, Czuczman MS, Kaminski M, Brazier RM, Spier C, Gopal AK, Maloney DG, Cheson BD, Dakhil SR, Miller TP, Fisher RI.                                                                      | J Clin Oncol. 2012 Dec 10                                                                |    |
| NCT00007189 | Alzheimer's Disease Anti-Inflammatory Prevention Trial (ADAPT)                                                                   | Completed              | Yes | 18474729 | ADAPT Research Group, Martin BK, Szekely C, Brandt J, Piantadosi S, Breitner JC, Craft S, Evans D, Green R, Mullan M.                                                                                                                        | Arch Neurol. 2008 Jul;65(7):896-905. Epub 2008 May 12.                                   |    |
| NCT00013143 | Patient Profiling and Provider Feedback to Reduce Adverse Drug Events                                                            | Completed              | Yes | 17460134 | Glassman PA, Belperio P, Lanto A, Simon B, Valuck R, Sayers J, Lee M.                                                                                                                                                                        | J Am Med Inform Assoc. 2007 Jul-Aug;14(4):424-31. Epub 2007 Apr 25.                      |    |
| NCT00013611 | Interleukin-2 Plus Antiretroviral Therapy for HIV-Infected Patients With Low CD4+ Counts (SILCAAT Study)                         | Completed              | Yes | 19828532 | INSIGHT-ESPRIT Study Group; SILCAAT Scientific Committee, Abrams D, LÃ©vy Y, Losso MH, Babiker A, Collins G, Cooper DA, Darbyshire J, Emery S, Fox L, Gordin F, Lane HC, Lundgren JD, Mitsuyasu R, Neaton JD, Phillips A, Routy JP, Tambussi | N Engl J Med. 2009 Oct 15;361(16):1548-59.                                               |    |

|             |                                                                                                                     |           |     |          |                                                                                                                                                                                                                               |                                                                                            |  |
|-------------|---------------------------------------------------------------------------------------------------------------------|-----------|-----|----------|-------------------------------------------------------------------------------------------------------------------------------------------------------------------------------------------------------------------------------|--------------------------------------------------------------------------------------------|--|
|             |                                                                                                                     |           |     |          | G, Wentworth D.                                                                                                                                                                                                               |                                                                                            |  |
| NCT00018005 | A Self-Management Intervention for Mild to Moderate Heart Failure                                                   | Completed | Yes | 20858878 | Powell LH, Calvin JE Jr, Richardson D, Janssen I, Mendes de Leon CF, Flynn KJ, Grady KL, Rucker-Whitaker CS, Eaton C, Avery E; HART Investigators.                                                                            | JAMA. 2010 Sep 22;304(12):1331-8.                                                          |  |
| NCT00021528 | Sequenced Treatment Alternatives to Relieve Depression (STAR*D)                                                     | Completed | Yes | 16554525 | Rush AJ, Trivedi MH, Wisniewski SR, Stewart JW, Nierenberg AA, Thase ME, Ritz L, Biggs MM, Warden D, Luther JF, Shores-Wilson K, Niederehe G, Fava M; STAR*D Study Team.                                                      | N Engl J Med. 2006 Mar 23;354(12):1231-42.                                                 |  |
| NCT00027300 | Safety and Efficacy of Natalizumab in the Treatment of Multiple Sclerosis                                           | Completed | Yes | 16510744 | Polman CH, O'Connor PW, Havrdova E, Hutchinson M, Kappos L, Miller DH, Phillips JT, Lublin FD, Giovannoni G, Wajgt A, Toal M, Lynn F, Panzara MA, Sandrock AW; AFFIRM Investigators.                                          | N Engl J Med. 2006 Mar 2;354(9):899-910.                                                   |  |
| NCT00030238 | Supplemental Calcium in Overweight People                                                                           | Completed | Yes | 19528561 | Yanovski JA, Parikh SJ, Yanoff LB, Denkinger BI, Calis KA, Reynolds JC, Sebring NG, McHugh T.                                                                                                                                 | Ann Intern Med. 2009 Jun 16;150(12):821-9, W145-6.                                         |  |
| NCT00032175 | Gemcitabine With or Without Capecitabine in Treating Patients With Locally Advanced or Metastatic Pancreatic Cancer | Completed | Yes | 19858379 | Cunningham D, Chau I, Stocken DD, Valle JW, Smith D, Steward W, Harper PG, Dunn J, Tudur-Smith C, West J, Falk S, Crellin A, Adab F, Thompson J, Leonard P, Ostrowski J, Eatock M, Scheithauer W, Herrmann R, Neoptolemos JP. | J Clin Oncol. 2009 Nov 20;27(33):5513-8. Epub 2009 Oct 26.                                 |  |
| NCT00032591 | The Home INR Study                                                                                                  | Completed | Yes | 20961244 | Matchar DB, Jacobson A, Dolor R, Edson R, Uyeda L, Phibbs CS, Vertrees JE, Shih MC, Holodniy M, Lavori P; THINRS Executive Committee and Site Investigators.                                                                  | N Engl J Med. 2010 Oct 21;363(17):1608-20. Erratum in: N Engl J Med. 2011 Jan 6;364(1):93. |  |
| NCT00032630 | Outcomes Following Myocardial Revascularization: On and Off Cardiopulmonary                                         | Completed | Yes | 19890125 | Shroyer AL, Grover FL, Hattler B, Collins JF, McDonald GO, Kozora E, Lucke JC, Baltz JH, Novitzky D; Veterans Affairs Randomized On/Off Bypass                                                                                | N Engl J Med. 2009 Nov 5;361(19):1827-37.                                                  |  |

|             |                                                                                                                                                                 |                        |     |          |                                                                                                                                                                                                            |                                                           |    |
|-------------|-----------------------------------------------------------------------------------------------------------------------------------------------------------------|------------------------|-----|----------|------------------------------------------------------------------------------------------------------------------------------------------------------------------------------------------------------------|-----------------------------------------------------------|----|
|             | Bypass                                                                                                                                                          |                        |     |          | (ROOBY) Study Group.                                                                                                                                                                                       |                                                           |    |
| NCT00034736 | A Study to Compare the Efficacy and Safety of Levofloxacin in the Treatment of Children With Community-acquired Pneumonia in the Hospital or Outpatient Setting | Completed              | Yes | 17901791 | Bradley JS, Arguedas A, Blumer JL, SÁñez-Llorens X, Melkote R, Noel GJ.                                                                                                                                    | Pediatr Infect Dis J. 2007 Oct;26(10):868-78.             |    |
| NCT00038129 | SPRINT - Randomized Trial of Tibial Fracture Fixation                                                                                                           | Completed              | Yes | 19047701 | Study to Prospectively Evaluate Reamed Intramedullary Nails in Patients with Tibial Fractures<br>Investigators, Bhandari M, Guyatt G, Tornetta P 3rd, Schemitsch EH, Swiontkowski M, Sanders D, Walter SD. | J Bone Joint Surg Am. 2008 Dec;90(12):2567-78.            |    |
| NCT00042081 | Prevention of Autogenous Vein Graft Failure in Coronary Artery Bypass Procedures                                                                                | Completed              | Yes | 16287955 | Alexander JH, Hafley G, Harrington RA, Peterson ED, Ferguson TB Jr, Lorenz TJ, Goyal A, Gibson M, Mack MJ, Gennevois D, Califf RM, Kouchoukos NT; PREVENT IV Investigators.                                | JAMA. 2005 Nov 16;294(19):2446-54.                        |    |
| NCT00042848 | Modafinil in Treating Fatigue in Patients Receiving Chemotherapy for Cancer                                                                                     | Completed              | Yes | 20564068 | Jean-Pierre P, Morrow GR, Roscoe JA, Heckler C, Mohile S, Janelins M, Peppone L, Hemstad A, Esparaz BT, Hopkins JO.                                                                                        | Cancer. 2010 Jul 15;116(14):3513-20.                      |    |
| NCT00045162 | S0124: Cisplatin Combined With Either Irinotecan or Etoposide in Treating Patients With Extensive-Stage Small Cell Lung Cancer                                  | Active, not recruiting | Yes | 19349543 | Lara PN Jr, Natale R, Crowley J, Lenz HJ, Redman MW, Carleton JE, Jett J, Langer CJ, Kuebler JP, Dakhil SR, Chansky K, Gandara DR.                                                                         | J Clin Oncol. 2009 May 20;27(15):2530-5. Epub 2009 Apr 6. |    |
| NCT00046761 | A Study to Evaluate the Effects of ONO-2506 Intravenous Infusion in Patients With Acute Ischemic Stroke                                                         | Terminated             | No  |          |                                                                                                                                                                                                            |                                                           | No |
| NCT00047437 | Exercise Training Program to Improve                                                                                                                            | Completed              | Yes | 19351941 | O'Connor CM, Whellan DJ, Lee KL, Keteyian SJ, Cooper LS,                                                                                                                                                   | JAMA. 2009 Apr 8;301(14):1439-50.                         |    |

|             |                                                                                                                                                        |                        |     |          |                                                                                                                                                                                                               |                                                                       |    |
|-------------|--------------------------------------------------------------------------------------------------------------------------------------------------------|------------------------|-----|----------|---------------------------------------------------------------------------------------------------------------------------------------------------------------------------------------------------------------|-----------------------------------------------------------------------|----|
|             | Clinical Outcomes in Individuals With Congestive Heart Failure                                                                                         |                        |     |          | Ellis SJ, Leifer ES, Kraus WE, Kitzman DW, Blumenthal JA, Rendall DS, Miller NH, Fleg JL, Schulman KA, McKelvie RS, Zannad F, PiÅ±a IL; HF-ACTION Investigators.                                              |                                                                       |    |
| NCT00049517 | Combination Chemotherapy With or Without Monoclonal Antibody Therapy Followed by Stem Cell Transplant in Treating Patients With Acute Myeloid Leukemia | Active, not recruiting | Yes | 21415269 | Fernandez HF, Sun Z, Litzow MR, Luger SM, Paietta EM, Racevskis J, Dewald G, Ketterling RP, Rowe JM, Lazarus HM, Tallman MS.                                                                                  | Blood. 2011 May 19;117(20):5306-13. Epub 2011 Mar 17.                 |    |
| NCT00049777 | A Trial of Heparin in Patients With Severe Sepsis Who Are Undergoing Treatment With Drotrecogin Alfa (Activated)                                       | Completed              | Yes | 17556722 | Levi M, Levy M, Williams MD, Douglas I, Artigas A, Antonelli M, Wyncoll D, Janes J, Booth FV, Wang D, Sundin DP, Macias WL; Xigris and Prophylactic HepaRin Evaluation in Severe Sepsis (XPRESS) Study Group. | Am J Respir Crit Care Med. 2007 Sep 1;176(5):483-90. Epub 2007 Jun 7. |    |
| NCT00057239 | An 8 Week Depression Study In Adults Diagnosed With Major Depressive Disorder                                                                          | Completed              | No  |          |                                                                                                                                                                                                               |                                                                       | No |
| NCT00057382 | T138067 Versus Doxorubicin in Chemotherapy-Naive, Unresectable, Hepatocellular Carcinoma Patients                                                      | Terminated             | No  |          |                                                                                                                                                                                                               |                                                                       | No |
| NCT00057551 | Research Evaluating the Value of Augmenting Medication With Psychotherapy (REVAMP)                                                                     | Active, not recruiting | Yes | 19884606 | Kocsis JH, Gelenberg AJ, Rothbaum BO, Klein DN, Trivedi MH, Manber R, Keller MB, Leon AC, Wisniewski SR, Arnow BA, Markowitz JC, Thase ME; REVAMP Investigators.                                              | Arch Gen Psychiatry. 2009 Nov;66(11):1178-88.                         |    |
| NCT00058838 | Study Evaluating Sumanriole for the Treatment of the Signs and Symptoms of                                                                             | Completed              | Yes | 17318839 | Singer C, Lamb J, Ellis A, Layton G; Sumanriole for Early Parkinson's Disease Study Group.                                                                                                                    | Mov Disord. 2007 Mar 15;22(4):476-82.                                 |    |

|             |                                                                                                                                                   |                        |     |          |                                                                                                                                                              |                                                             |    |
|-------------|---------------------------------------------------------------------------------------------------------------------------------------------------|------------------------|-----|----------|--------------------------------------------------------------------------------------------------------------------------------------------------------------|-------------------------------------------------------------|----|
|             | Early Parkinson's Disease                                                                                                                         |                        |     |          |                                                                                                                                                              |                                                             |    |
| NCT00059215 | A Trial of CS-747 (Prasugrel) Compared With Clopidogrel in Patients Undergoing Percutaneous Coronary Intervention (PCI)                           | Completed              | Yes | 15967851 | Wiviott SD, Antman EM, Winters KJ, Weerakkody G, Murphy SA, Behounek BD, Carney RJ, Lazzam C, McKay RG, McCabe CH, Braunwald E; JUMBO-TIMI 26 Investigators. | Circulation. 2005 Jun 28;111(25):3366-73. Epub 2005 Jun 20. |    |
| NCT00060476 | Treatment With MK0966 for the Prevention of Prostate Cancer                                                                                       | Completed              | Yes | 17651539 | van Adelsberg J, Gann P, Ko AT, Damber JE, Logothetis C, Marberger M, Schmitz-Drager BJ, Tubaro A, Harms CJ, Roehrborn C.                                    | Curr Med Res Opin. 2007 Sep;23(9):2063-70.                  |    |
| NCT00061022 | Safety and Effectiveness of NXY-059 for the Treatment of Patients Who Have Suffered From a Stroke                                                 | Completed              | Yes | 17687131 | Shuaib A, Lees KR, Lyden P, Grotta J, Davalos A, Davis SM, Diener HC, Ashwood T, Wasiewski WW, Emeribe U; SAINT II Trial Investigators.                      | N Engl J Med. 2007 Aug 9;357(6):562-71.                     |    |
| NCT00062582 | Effect of Roflumilast on Pulmonary Function and Respiratory Symptoms in Patients With Chronic Obstructive Pulmonary Disease (COPD) (BY217/M2-110) | Completed              | No  |          |                                                                                                                                                              |                                                             | No |
| NCT00063999 | Combination Chemotherapy in Treating Patients With Stage III, Stage IV, or Recurrent Endometrial Cancer                                           | Active, not recruiting | No  |          |                                                                                                                                                              |                                                             | No |
| NCT00064038 | S0232 Dexamethasone With or Without Lenalidomide in Treating Patients With Previously Untreated Stage I, Stage II, or Stage III Multiple Myeloma  | Active, not recruiting | Yes | 20876454 | Zonder JA, Crowley J, Hussein MA, Bolejack V, Moore DF Sr, Whittenberger BF, Abidi MH, Durie BG, Barlogie B.                                                 | Blood. 2010 Dec 23;116(26):5838-41. Epub 2010 Sep 27.       |    |

|             |                                                                                                                                                           |                        |     |          |                                                                                                                                                      |                                                            |    |
|-------------|-----------------------------------------------------------------------------------------------------------------------------------------------------------|------------------------|-----|----------|------------------------------------------------------------------------------------------------------------------------------------------------------|------------------------------------------------------------|----|
| NCT00064077 | Comparison of Four Combination Chemotherapy Regimens Using Cisplatin in Treating Patients With Stage IVB, Recurrent, or Persistent Cancer of the Cervix   | Active, not recruiting | Yes | 19720909 | Monk BJ, Sill MW, McMeekin DS, Cohn DE, Ramondetta LM, Boardman CH, Benda J, Cella D.                                                                | J Clin Oncol. 2009 Oct 1;27(28):4649-55. Epub 2009 Aug 31. |    |
| NCT00064428 | MICHELANGELO OASIS-6 : Fondaparinux in ST Elevation Myocardial Infarction                                                                                 | Completed              | Yes | 16537725 | Yusuf S, Mehta SR, Chrolavicius S, Afzal R, Pogue J, Granger CB, Budaj A, Peters RJ, Bassand JP, Wallentin L, Joyner C, Fox KA; OASIS-6 Trial Group. | JAMA. 2006 Apr 5;295(13):1519-30. Epub 2006 Mar 14.        |    |
| NCT00065585 | Efficacy of Acupuncture for Chronic Low Back Pain                                                                                                         | Active, not recruiting | Yes | 19433697 | Cherkin DC, Sherman KJ, Avins AL, Erro JH, Ichikawa L, Barlow WE, Delaney K, Hawkes R, Hamilton L, Pressman A, Khalsa PS, Deyo RA.                   | Arch Intern Med. 2009 May 11;169(9):858-66.                |    |
| NCT00067353 | Yakima Head Start Fluoride Varnish Study                                                                                                                  | Completed              | Yes | 20016179 | Weinstein P, Spiekerman C, Milgrom P.                                                                                                                | Caries Res. 2009;43(6):484-90. Epub 2009 Dec 10.           |    |
| NCT00070278 | Neoadjuvant Epirubicin, Cyclophosphamide, and Paclitaxel With or Without Gemcitabine in Treating Women Who Are Undergoing Surgery for Early Breast Cancer | Active, not recruiting | No  |          |                                                                                                                                                      |                                                            | No |
| NCT00071266 | The Dose Response of Niacin ER/Lovastatin on Peak Walking Time (PWT) in Patients With Intermittent Claudication - TROPIC                                  | Completed              | No  |          |                                                                                                                                                      |                                                            | No |
| NCT00071279 | SR34006 Compared to Placebo in Patients Who Have Completed 6 Months of Treatment for Symptomatic                                                          | Completed              | Yes | 17855671 | van Gogh Investigators, Buller HR, Cohen AT, Davidson B, Decousus H, Gallus AS, Gent M, Pillion G, Piovela F, Prins MH, Raskob GE.                   | N Engl J Med. 2007 Sep 13;357(11):1105-12.                 |    |

|             |                                                                                                                                                           |                        |     |          |                                                                                                                                                                                                                                                 |                                                           |    |
|-------------|-----------------------------------------------------------------------------------------------------------------------------------------------------------|------------------------|-----|----------|-------------------------------------------------------------------------------------------------------------------------------------------------------------------------------------------------------------------------------------------------|-----------------------------------------------------------|----|
|             | Pulmonary Embolism or Deep Vein Thrombosis                                                                                                                |                        |     |          |                                                                                                                                                                                                                                                 |                                                           |    |
| NCT00073177 | Efficacy and Safety of Roflumilast in Patients With Asthma (BY217/M2-012)                                                                                 | Completed              | No  |          |                                                                                                                                                                                                                                                 |                                                           | No |
| NCT00073411 | Duloxetine Compared to Escitalopram and Placebo in the Treatment of Patients With Depression                                                              | Completed              | Yes | 17288694 | Nierenberg AA, Greist JH, Mallinckrodt CH, Prakash A, Sambunaris A, Tollefson GD, Wohlreich MM.                                                                                                                                                 | Curr Med Res Opin. 2007 Feb;23(2):401-16.                 |    |
| NCT00074425 | BufferGel and PRO 2000/5: Vaginal Gels to Prevent HIV Infection in Women                                                                                  | Completed              | Yes | 21330907 | Abdool Karim SS, Richardson BA, Ramjee G, Hoffman IF, Chirenje ZM, Taha T, Kapina M, Maslankowski L, Coletti A, Profy A, Moench TR, Piwowar-Manning E, MÅsse B, Hillier SL, Soto-Torres L; HIV Prevention Trials Network (HPTN) 035 Study Team. | AIDS. 2011 Apr 24;25(7):957-66.                           |    |
| NCT00074828 | New Oral Anticoagulant Therapy for the Prevention of Blood Clots Following Hip or Knee Replacement Surgery                                                | Completed              | Yes | 17408408 | Agnelli G, Haas S, Ginsberg JS, Krueger KA, Dmitrienko A, Brandt JT.                                                                                                                                                                            | J Thromb Haemost. 2007 Apr;5(4):746-53.                   |    |
| NCT00075270 | Paclitaxel With / Without GW572016 (Lapatinib) As First Line Therapy For Women With Advanced Or Metastatic Breast Cancer                                  | Completed              | Yes | 20095796 | Sherrill B, Di Leo A, Amonkar MM, Wu Y, Zvirbule Z, Aziz Z, Bines J, Gomez HL.                                                                                                                                                                  | Curr Med Res Opin. 2010 Apr;26(4):767-75.                 |    |
| NCT00075686 | S0205 Gemcitabine With or Without Cetuximab as First-Line Therapy in Treating Patients With Locally Advanced Unresectable or Metastatic Adenocarcinoma of | Active, not recruiting | Yes | 20606093 | Philip PA, Benedetti J, Corless CL, Wong R, O'Reilly EM, Flynn PJ, Rowland KM, Atkins JN, Mirtsching BC, Rivkin SE, Khorana AA, Goldman B, Fenoglio-Preiser CM, Abbruzzese JL, Blanke CD.                                                       | J Clin Oncol. 2010 Aug 1;28(22):3605-10. Epub 2010 Jul 6. |    |



|             |                                                                                                                                                   |           |     |          |                                                                                                                                                                                             |                                                          |  |
|-------------|---------------------------------------------------------------------------------------------------------------------------------------------------|-----------|-----|----------|---------------------------------------------------------------------------------------------------------------------------------------------------------------------------------------------|----------------------------------------------------------|--|
|             | the Pancreas                                                                                                                                      |           |     |          |                                                                                                                                                                                             |                                                          |  |
| NCT00075959 | Safety of NXY-059 for the Treatment of Patients Who Have Suffered From a Stroke                                                                   | Completed | Yes | 17569876 | Lyden PD, Shuaib A, Lees KR, Davalos A, Davis SM, Diener HC, Grotta JC, Ashwood TJ, Hardemark HG, Svensson HH, Rodichok L, Wasiewski WW, Ahlberg G; CHANT Trial Investigators.              | Stroke. 2007 Aug;38(8):2262-9. Epub 2007 Jun 14.         |  |
| NCT00076232 | A Study of Acyclovir to Help Prevent HIV Infection in People With Genital Herpes                                                                  | Completed | Yes | 18572080 | Celum C, Wald A, Hughes J, Sanchez J, Reid S, Delany-Moretlwe S, Cowan F, Casapia M, Ortiz A, Fuchs J, Buchbinder S, Koblin B, Zwierski S, Rose S, Wang J, Corey L; HPTN 039 Protocol Team. | Lancet. 2008 Jun 21;371(9630):2109-19.                   |  |
| NCT00076388 | Iressa Versus Docetaxel (Taxotere)                                                                                                                | Completed | Yes | 19027483 | Kim ES, Hirsh V, Mok T, Socinski MA, Gervais R, Wu YL, Li LY, Watkins CL, Sellers MV, Lowe ES, Sun Y, Liao ML, Osterlind K, Reck M, Armour AA, Shepherd FA, Lippman SM, Douillard JY.       | Lancet. 2008 Nov 22;372(9652):1809-18.                   |  |
| NCT00078039 | Trial Evaluating Three Fixed Dosages of Paliperidone Extended-Release (ER) Tablets and Olanzapine in the Treatment of Patients With Schizophrenia | Completed | Yes | 17092691 | Kane J, Canas F, Kramer M, Ford L, Gassmann-Mayer C, Lim P, Eerdeken M.                                                                                                                     | Schizophr Res. 2007 Feb;90(1-3):147-61. Epub 2006 Nov 7. |  |
| NCT00078338 | Rebif?« Versus Copaxone?« in the Treatment of Relapsing Remitting Multiple Sclerosis                                                              | Completed | Yes | 18789766 | Mikol DD, Barkhof F, Chang P, Coyle PK, Jeffery DR, Schwid SR, Stubinski B, Uitdehaag BM; REGARD study group.                                                                               | Lancet Neurol. 2008 Oct;7(10):903-14. Epub 2008 Sep 11.  |  |
| NCT00079937 | Efficacy and Safety of Omalizumab in Children (6 - < 12 Years) With Moderate-severe, Inadequately Controlled Allergic                             | Completed | Yes | 19910033 | Lanier B, Bridges T, Kulus M, Taylor AF, Berhane I, Vidaurre CF.                                                                                                                            | J Allergy Clin Immunol. 2009 Dec;124(6):1210-6. Epub .   |  |

|             |                                                                                                                           |                        |     |          |                                                                                                                                                                                                                       |                                                                                                      |    |
|-------------|---------------------------------------------------------------------------------------------------------------------------|------------------------|-----|----------|-----------------------------------------------------------------------------------------------------------------------------------------------------------------------------------------------------------------------|------------------------------------------------------------------------------------------------------|----|
|             | Asthma                                                                                                                    |                        |     |          |                                                                                                                                                                                                                       |                                                                                                      |    |
| NCT00080093 | Increasing Condom Use in People at Risk for HIV Infection                                                                 | Active, not recruiting | No  |          |                                                                                                                                                                                                                       |                                                                                                      | No |
| NCT00080275 | Evaluation of the Safety & Efficacy of a Combination of Niacin ER & Simvastatin in Patients With Dyslipidemia (OCEANS)    | Completed              | Yes | 18422390 | Karas RH, Kashyap ML, Knopp RH, Keller LH, Bajorunas DR, Davidson MH.                                                                                                                                                 | Am J Cardiovasc Drugs. 2008;8(2):69-81.                                                              |    |
| NCT00080522 | Strategies for Delivering Anti-HIV Therapy in South Africa                                                                | Completed              | Yes | 20557927 | Sanne I, Orrell C, Fox MP, Conradie F, Ive P, Zeinecker J, Cornell M, Heiberg C, Ingram C, Panchia R, Rassool M, Gonin R, Stevens W, Truter H, Dehlinger M, van der Horst C, McIntyre J, Wood R; CIPRA-SA Study Team. | Lancet. 2010 Jul 3;376(9734):33-40. Erratum in: Lancet. 2010 Sep 25;376(9746):1054.                  |    |
| NCT00083421 | Effects of ONO-2506PO in Patients With Alzheimer's Disease                                                                | Completed              | No  |          |                                                                                                                                                                                                                       |                                                                                                      | No |
| NCT00083889 | SU011248 Versus Interferon-Alfa As First-Line Systemic Therapy For Patients With Metastatic Renal Cell Carcinoma          | Completed              | Yes | 17215529 | Motzer RJ, Hutson TE, Tomczak P, Michaelson MD, Bukowski RM, Rixe O, Oudard S, Negrier S, Szczylik C, Kim ST, Chen I, Bycott PW, Baum CM, Figlin RA.                                                                  | N Engl J Med. 2007 Jan 11;356(2):115-24.                                                             |    |
| NCT00083954 | Controlled Study of the Use of Quetiapine Fumarate in the Treatment of Patients With Bipolar Depression                   | Completed              | Yes | 17110817 | Thase ME, Macfadden W, Weisler RH, Chang W, Paulsson B, Khan A, Calabrese JR; BOLDER II Study Group.                                                                                                                  | J Clin Psychopharmacol. 2006 Dec;26(6):600-9. Erratum in: J Clin Psychopharmacol. 2007 Feb;27(1):51. |    |
| NCT00085891 | Efficacy & Safety of Quetiapine Fumarate (SEROQUEL) & Placebo in the Treatment of Acutely Ill Patients With Schizophrenia | Completed              | Yes | 21240151 | Cutler AJ, Tran-Johnson T, Kalali A, Astr m M, Brecher M, Meulien D.                                                                                                                                                  | Psychopharmacol Bull. 2010;43(4):37-69.                                                              |    |

|             |                                                                                                                                                                    |                        |     |          |                                                                                                                                                                                                                                             |                                                                                                               |    |
|-------------|--------------------------------------------------------------------------------------------------------------------------------------------------------------------|------------------------|-----|----------|---------------------------------------------------------------------------------------------------------------------------------------------------------------------------------------------------------------------------------------------|---------------------------------------------------------------------------------------------------------------|----|
| NCT00086515 | Metformin Add-on Study in Patients With Type 2 Diabetes Mellitus (0431-020)(COMPLETED)                                                                             | Completed              | Yes | 17130197 | Charbonnel B, Karasik A, Liu J, Wu M, Meininger G; Sitagliptin Study 020 Group.                                                                                                                                                             | Diabetes Care. 2006 Dec;29(12):2638-43.                                                                       |    |
| NCT00087490 | Skin Structure Infections With Suspected or Proven Methicillin-Resistant Staphylococcus Aureus (MRSA)                                                              | Completed              | Yes | 20227056 | Itani KM, Dryden MS, Bhattacharyya H, Kunkel MJ, Baruch AM, Weigelt JA.                                                                                                                                                                     | Am J Surg. 2010 Jun;199(6):804-16. Epub 2010 Mar 15.                                                          |    |
| NCT00087711 | A Randomized Phase 3 Trial of Pemetrexed and Cisplatin Versus Gemcitabine and Cisplatin in Patients With Locally Advanced or Metastatic Non Small Cell Lung Cancer | Completed              | Yes | 18506025 | Scagliotti GV, Parikh P, von Pawel J, Biesma B, Vansteenkiste J, Manegold C, Serwatowski P, Gatzemeier U, Digumarti R, Zukin M, Lee JS, Mellemegaard A, Park K, Patil S, Rolski J, Goksel T, de Marinis F, Simms L, Sugarman KP, Gandara D. | J Clin Oncol. 2008 Jul 20;26(21):3543-51. Epub 2008 May 27.                                                   |    |
| NCT00087724 | A Randomized Study to Evaluate FK962 in Subjects With Mild to Moderate Alzheimer's Disease                                                                         | Terminated             | No  |          |                                                                                                                                                                                                                                             |                                                                                                               | No |
| NCT00088179 | Pexelizumab in Patients Undergoing Coronary Artery Bypass Grafting With Cardiopulmonary Bypass (PRIMO-CABG II)                                                     | Active, not recruiting | Yes | 20880552 | Smith PK, Sherman SK, Chen JC, Carrier M, Verrier ED, Adams PX, Todaro TG, Muhlbaier LH, Levy JH; PRIMO-CABG II Investigators.                                                                                                              | J Thorac Cardiovasc Surg. 2011 Jul;142(1):89-98. Epub 2010 Sep 28.                                            |    |
| NCT00089791 | A Study to Evaluate Denosumab in the Treatment of Postmenopausal Osteoporosis                                                                                      | Completed              | Yes | 19671655 | Cummings SR, San Martin J, McClung MR, Siris ES, Eastell R, Reid IR, Delmas P, Zoog HB, Austin M, Wang A, Kutilek S, Adami S, Zanchetta J, Libanati C, Siddhanti S, Christiansen C; FREEDOM Trial.                                          | N Engl J Med. 2009 Aug 20;361(8):756-65. Epub 2009 Aug 11. Erratum in: N Engl J Med. 2009 Nov 5;361(19):1914. |    |
| NCT00089895 | EARLY ACS: Early Glycoprotein IIb/IIIa Inhibition in Patients With Non-ST-segment Elevation Acute                                                                  | Completed              | Yes | 19332455 | Giugliano RP, White JA, Bode C, Armstrong PW, Montalescot G, Lewis BS, van 't Hof A, Berdan LG, Lee KL, Strony JT, Hildemann S, Veltri E, Van de                                                                                            | N Engl J Med. 2009 May 21;360(21):2176-90. Epub 2009 Mar 30.                                                  |    |

|             |                                                                                                                                                        |           |     |          |                                                                                                                                                                                                                                      |                                                          |  |
|-------------|--------------------------------------------------------------------------------------------------------------------------------------------------------|-----------|-----|----------|--------------------------------------------------------------------------------------------------------------------------------------------------------------------------------------------------------------------------------------|----------------------------------------------------------|--|
|             | Coronary Syndrome (Study P03684AM2)(COMPLETED)                                                                                                         |           |     |          | Werf F, Braunwald E, Harrington RA, Califf RM, Newby LK; EARLY ACS Investigators.                                                                                                                                                    |                                                          |  |
| NCT00089986 | GR270773 In The Treatment Of Suspected Or Confirmed Gram-Negative Severe Sepsis In Adults                                                              | Completed | Yes | 19770753 | Dellinger RP, Tomayko JF, Angus DC, Opal S, Cupo MA, McDermott S, Ducher A, Calandra T, Cohen J; Lipid Infusion and Patient Outcomes in Sepsis (LIPOS) Investigators.                                                                | Crit Care Med. 2009 Nov;37(11):2929-38.                  |  |
| NCT00091572 | Temozolomide Versus Dacarbazine in Stage IV Metastatic Melanoma (Study P03267AM2)(COMPLETED)                                                           | Completed | Yes | 21600759 | Patel PM, Suci S, Mortier L, Kruit WH, Robert C, Schadendorf D, Trefzer U, Punt CJ, Dummer R, Davidson N, Becker J, Conry R, Thompson JA, Hwu WJ, Engelen K, Agarwala SS, Keilholz U, Eggermont AM, Spatz A; EORTC Melanoma Group.   | Eur J Cancer. 2011 Jul;47(10):1476-83. Epub 2011 May 18. |  |
| NCT00091819 | Comparison of Telavancin and Vancomycin for Complicated Skin and Skin Structure Infections With a Focus on Methicillin-resistant Staphylococcus Aureus | Completed | Yes | 18444791 | Stryjewski ME, Graham DR, Wilson SE, O'Riordan W, Young D, Lentnek A, Ross DP, Fowler VG, Hopkins A, Friedland HD, Barriere SL, Kitt MM, Corey GR; Assessment of Telavancin in Complicated Skin and Skin-Structure Infections Study. | Clin Infect Dis. 2008 Jun 1;46(11):1683-93.              |  |
| NCT00093886 | Clevidipine in the Preoperative Treatment of Hypertension                                                                                              | Completed | Yes | 18806012 | Aronson S, Dyke CM, Stierer KA, Levy JH, Cheung AT, Lumb PD, Kereiakes DJ, Newman MF.                                                                                                                                                | Anesth Analg. 2008 Oct;107(4):1110-21.                   |  |
| NCT00093899 | A Study to Evaluate an Investigational Drug in Patients With Mixed Hyperlipidemia                                                                      | Completed | Yes | 17239698 | Farnier M, Roth E, Gil-Extremera B, Mendez GF, Macdonell G, Hamlin C, Perevozskaya I, Davies MJ, Kush D, Mitchel YB; Ezetimibe/Simvastatin + Fenofibrate Study Group.                                                                | Am Heart J. 2007 Feb;153(2):335.e1-8.                    |  |
| NCT00093912 | Clevidipine in the Perioperative Treatment of Hypertension                                                                                             | Completed | Yes | 18806012 | Aronson S, Dyke CM, Stierer KA, Levy JH, Cheung AT, Lumb PD, Kereiakes DJ, Newman MF.                                                                                                                                                | Anesth Analg. 2008 Oct;107(4):1110-21.                   |  |

|             |                                                                                                                                              |            |     |          |                                                                                                                                                                                                          |                                                              |    |
|-------------|----------------------------------------------------------------------------------------------------------------------------------------------|------------|-----|----------|----------------------------------------------------------------------------------------------------------------------------------------------------------------------------------------------------------|--------------------------------------------------------------|----|
| NCT00093925 | Clevidipine in the Postoperative Treatment of Hypertension                                                                                   | Completed  | Yes | 18806012 | Aronson S, Dyke CM, Stierer KA, Levy JH, Cheung AT, Lumb PD, Kereiakes DJ, Newman MF.                                                                                                                    | Anesth Analg. 2008 Oct;107(4):1110-21.                       |    |
| NCT00094549 | Olanzapine vs. Comparator and Placebo in the Treatment of Patients With Bipolar I Disorder                                                   | Completed  | Yes | 19014751 | Tohen M, Vieta E, Goodwin GM, Sun B, Amsterdam JD, Banov M, Shekhar A, Aaronson ST, Bardenstein L, Grecu-Gabos I, Tochilov V, Prelipceanu D, Oliff HS, Kryzhanovskaya L, Bowden C.                       | J Clin Psychiatry. 2008 Nov;69(11):1776-89. Epub 2008 Oct 7. |    |
| NCT00094757 | An Investigational Drug Study in Patients With Type 2 Diabetes Mellitus (MK0431-023)(COMPLETED)                                              | Completed  | Yes | 17001471 | Raz I, Hanefeld M, Xu L, Caria C, Williams-Herman D, Khatami H; Sitagliptin Study 023 Group.                                                                                                             | Diabetologia. 2006 Nov;49(11):2564-71. Epub 2006 Sep 26.     |    |
| NCT00095004 | Study to Test an Approved Product in the Early Treatment of Migraine                                                                         | Completed  | Yes | 16732837 | Cady R, Martin V, Mauskop A, Rodgers A, Hustad CM, Ramsey KE, Skobieranda F.                                                                                                                             | Headache. 2006 Jun;46(6):914-24.                             |    |
| NCT00095069 | Efficacy and Safety of MK0928 for Insomnia in Adults                                                                                         | Completed  | Yes | 20191935 | Roth T, Lines C, Vandormael K, Ceesay P, Anderson D, Snavely D.                                                                                                                                          | J Clin Sleep Med. 2010 Feb 15;6(1):30-9.                     |    |
| NCT00097266 | Study of Aripiprazole in Patients With Acute Bipolar Mania                                                                                   | Completed  | Yes | 19118324 | Young AH, Oren DA, Lowy A, McQuade RD, Marcus RN, Carson WH, Spiller NH, Torbeyns AF, Sanchez R.                                                                                                         | Br J Psychiatry. 2009 Jan;194(1):40-8.                       |    |
| NCT00097344 | The CAT Study: Atamestane Plus Toremifene Versus Letrozole in Advanced Breast Cancer                                                         | Terminated | No  |          |                                                                                                                                                                                                          |                                                              | No |
| NCT00097591 | A Comparison of Prasugrel (CS-747) and Clopidogrel in Acute Coronary Syndrome Subjects Who Are to Undergo Percutaneous Coronary Intervention | Completed  | Yes | 17982182 | Wiviott SD, Braunwald E, McCabe CH, Montalescot G, Ruzyllo W, Gottlieb S, Neumann FJ, Ardissino D, De Servi S, Murphy SA, Riesmeyer J, Weerakkody G, Gibson CM, Antman EM; TRITON-TIMI 38 Investigators. | N Engl J Med. 2007 Nov 15;357(20):2001-15. Epub 2007 Nov 4.  |    |
| NCT00099775 | Caspofungin to Prevent Candidiasis in Adults in Hospital Intensive Care Units                                                                | Completed  | No  |          |                                                                                                                                                                                                          |                                                              | No |

|             |                                                                                                                        |           |     |          |                                                                                                                                                                                     |                                                                                                           |  |
|-------------|------------------------------------------------------------------------------------------------------------------------|-----------|-----|----------|-------------------------------------------------------------------------------------------------------------------------------------------------------------------------------------|-----------------------------------------------------------------------------------------------------------|--|
| NCT00100126 | APC-231 Once a Day (QD) for 7 Days vs. Penicillin Taken Four Times a Day (QID) in Pediatric Patients With Strep Throat | Completed | Yes | 18332170 | Pichichero ME, Casey JR, Block SL, Guttendorf R, Flanner H, Markowitz D, Clausen S.                                                                                                 | Antimicrob Agents Chemother. 2008 Jul;52(7):2512-20. Epub 2008 Mar 10.                                    |  |
| NCT00100386 | Strategies to Reduce Transmission of Antimicrobial Resistant Bacteria in Intensive Care Units (STAR*ICU) Trial         | Completed | Yes | 21488763 | Huskins WC, Huckabee CM, O'Grady NP, Murray P, Kopetskie H, Zimmer L, Walker ME, Sinkowitz-Cochran RL, Jernigan JA, Samore M, Wallace D, Goldmann DA; STAR*ICU Trial Investigators. | N Engl J Med. 2011 Apr 14;364(15):1407-18.                                                                |  |
| NCT00100399 | Fluarix Immunogenicity and Safety Trial                                                                                | Completed | Yes | 17012883 | Treanor JJ, Campbell JD, Brady RC, Keitel WA, Drame M, Jain VK, Innis BL.                                                                                                           | Hum Vaccin. 2005 Nov-Dec;1(6):239-44. Epub 2005 Nov 5.                                                    |  |
| NCT00101803 | Efficacy and Safety of Vildagliptin in Combination With Pioglitazone in Drug Naive Patients With Type 2 Diabetes       | Completed | Yes | 17300593 | Rosenstock J, Kim SW, Baron MA, Camisasca RP, Cressier F, Couturier A, Dejager S.                                                                                                   | Diabetes Obes Metab. 2007 Mar;9(2):175-85.                                                                |  |
| NCT00102167 | Study of MK0928 in Healthy Adult Volunteers in a Model of Insomnia                                                     | Completed | Yes | 17765013 | Walsh JK, Mayleben D, Guico-Pabia C, Vandormael K, Martinez R, Deacon S.                                                                                                            | Sleep Med. 2008 May;9(4):393-402. Epub 2007 Aug 30.                                                       |  |
| NCT00102388 | Efficacy and Safety of Vildagliptin Compared to Gliclazide in Drug Naive Patients With Type 2 Diabetes                 | Completed | Yes | 19705345 | Foley JE, Sreenan S.                                                                                                                                                                | Horm Metab Res. 2009 Dec;41(12):905-9. Epub 2009 Aug 24. Erratum in: Horm Metab Res. 2009 Dec;41(12):909. |  |
| NCT00103818 | An Investigational Study of MK0928 in Adult Outpatients With Insomnia                                                  | Completed | Yes | 20191935 | Roth T, Lines C, Vandormael K, Ceesay P, Anderson D, Snavely D.                                                                                                                     | J Clin Sleep Med. 2010 Feb 15;6(1):30-9.                                                                  |  |
| NCT00103857 | MK0431 (Sitagliptin) and Metformin Co-Administration Factorial Study in Patients With Type 2 Diabetes Mellitus         | Completed | Yes | 17485570 | Goldstein BJ, Feinglos MN, Lunceford JK, Johnson J, Williams-Herman DE; Sitagliptin 036 Study Group.                                                                                | Diabetes Care. 2007 Aug;30(8):1979-87. Epub 2007 May 7. Erratum in: Diabetes Care. 2008 Aug;31(8):1713.   |  |
| NCT00104182 | Comparison of Insulin Detemir Morning, Insulin Detemir                                                                 | Completed | Yes | 17157113 | Philis-Tsimikas A, Charpentier G, Clauson P, Ravn GM, Roberts VL, Thorsteinsson B.                                                                                                  | Clin Ther. 2006 Oct;28(10):1569-81. Erratum in: Clin Ther. 2006                                           |  |

|             |                                                                                                                              |           |     |          |                                                                                                                                                                                                                                                          |                                                                                                  |    |
|-------------|------------------------------------------------------------------------------------------------------------------------------|-----------|-----|----------|----------------------------------------------------------------------------------------------------------------------------------------------------------------------------------------------------------------------------------------------------------|--------------------------------------------------------------------------------------------------|----|
|             | Evening and NPH Insulin Evening in Patients With Type 2 Diabetes                                                             |           |     |          |                                                                                                                                                                                                                                                          | Nov;28(11):1967.                                                                                 |    |
| NCT00105443 | A Phase III Study of Sorafenib in Patients With Advanced Hepatocellular Carcinoma                                            | Completed | Yes | 18650514 | Llovet JM, Ricci S, Mazzaferro V, Hilgard P, Gane E, Blanc JF, de Oliveira AC, Santoro A, Raoul JL, Forner A, Schwartz M, Porta C, Zeuzem S, Bolondi L, Greten TF, Galle PR, Seitz JF, Borbath I, Häussinger D, Giannaris T, Shan M, Moscovici M, et al. | N Engl J Med. 2008 Jul 24;359(4):378-90.                                                         |    |
| NCT00105989 | Duloxetine Versus Placebo in the Prevention of Recurrence of Major Depressive Disorder                                       | Completed | Yes | 19552867 | Perahia DG, Maina G, Thase ME, Spann ME, Wang F, Walker DJ, Detke MJ.                                                                                                                                                                                    | J Clin Psychiatry. 2009 May;70(5):706-16. Erratum in: J Clin Psychiatry. 2009 Dec;70(12):1729.   |    |
| NCT00106132 | Steroid Injections vs. Standard Treatment for Macular Edema Due to Retinal Blood Vessel Blockage                             | Completed | No  |          |                                                                                                                                                                                                                                                          |                                                                                                  | No |
| NCT00106340 | Vildagliptin Compared to Glimepiride in Combination With Metformin in Patients With Type 2 Diabetes                          | Completed | Yes | 19125777 | Ferrannini E, Fonseca V, Zinman B, Matthews D, Ahr n B, Byiers S, Shao Q, Dejager S.                                                                                                                                                                     | Diabetes Obes Metab. 2009 Feb;11(2):157-66. Erratum in: Diabetes Obes Metab. 2009 Apr;11(4):405. |    |
| NCT00106509 | A Study of GT267-004 Versus Vancomycin and GT267-004 Versus Metronidazole in Patients With C.Difficile - Associated Diarrhea | Completed | No  |          |                                                                                                                                                                                                                                                          |                                                                                                  | No |
| NCT00106808 | Study of Muraglitazar Versus Pioglitazone in Type 2 Diabetes                                                                 | Completed | No  |          |                                                                                                                                                                                                                                                          |                                                                                                  | No |
| NCT00107640 | Project SHARE (Senior Health and Alcohol Risk Education)                                                                     | Completed | No  |          |                                                                                                                                                                                                                                                          |                                                                                                  | No |
| NCT00109343 | V221 Concomitant                                                                                                             | Completed | Yes | 22123890 | Leonardi M, Bromberg K,                                                                                                                                                                                                                                  | Pediatrics. 2011                                                                                 |    |

|             |                                                                                                                                                              |            |     |          |                                                                                                                                                                                                                                                                   |                                                                                          |    |
|-------------|--------------------------------------------------------------------------------------------------------------------------------------------------------------|------------|-----|----------|-------------------------------------------------------------------------------------------------------------------------------------------------------------------------------------------------------------------------------------------------------------------|------------------------------------------------------------------------------------------|----|
|             | Use Study With Pneumococcal Conjugate Vaccine                                                                                                                |            |     |          | Baxter R, Gardner JL, Klopfer S, Nicholson O, Brockley M, Trammel J, Leamy V, Williams W, Kuter B, SchÄ¶del F.                                                                                                                                                    | Dec;128(6):e1387-94. Epub 2011 Nov 28.                                                   |    |
| NCT00110435 | A Multicenter Study to Evaluate the Cholesterol Lowering Effects of Two Marketed Products in Patients With Type 2 Diabetes Mellitus and Hypercholesterolemia | Completed  | Yes | 17165637 | Goldberg RB, Guyton JR, Mazzone T, Weinstock RS, Polis A, Edwards P, Tomassini JE, Tershakovec AM.                                                                                                                                                                | Mayo Clin Proc. 2006 Dec;81(12):1579-88. Erratum in: Mayo Clin Proc. 2007 Mar;82(3):387. |    |
| NCT00111150 | Botswana Tenofovir Oral HIV Prophylaxis Trial                                                                                                                | Terminated | Yes | 22784038 | Thigpen MC, Kebaabetswe PM, Paxton LA, Smith DK, Rose CE, Segolodi TM, Henderson FL, Pathak SR, Soud FA, Chillag KL, Mutanhaurwa R, Chirwa LI, Kasonde M, Abebe D, Buliva E, Gvetadze RJ, Johnson S, Sukalac T, Thomas VT, Hart C, Johnson JA, Malotte CK, et al. | N Engl J Med. 2012 Aug 2;367(5):423-34. Epub 2012 Jul 11.                                |    |
| NCT00111306 | Study of Epratuzumab in Systemic Lupus Erythematosus                                                                                                         | Terminated | No  |          |                                                                                                                                                                                                                                                                   |                                                                                          | No |
| NCT00111891 | An Investigational Drug Study Evaluating a Novel Approach to Treat Dyslipidemia                                                                              | Completed  | No  |          |                                                                                                                                                                                                                                                                   |                                                                                          | No |
| NCT00112268 | Quitlink : A Leveraging Solution to Tobacco Counseling                                                                                                       | Completed  | Yes | 20307804 | Rothemich SF, Woolf SH, Johnson RE, Devers KJ, Flores SK, Villars P, Rabius V, McAfee T.                                                                                                                                                                          | Am J Prev Med. 2010 Apr;38(4):367-74.                                                    |    |
| NCT00113308 | COX-2 Inhibitor Study In Patients With Rheumatoid Arthritis                                                                                                  | Completed  | No  |          |                                                                                                                                                                                                                                                                   |                                                                                          | No |
| NCT00115921 | Evaluation of Home-Based Management of Fever in Urban Ugandan Children                                                                                       | Completed  | Yes | 19362361 | Staedke SG, Mwebaza N, Kanya MR, Clark TD, Dorsey G, Rosenthal PJ, Whitty CJ.                                                                                                                                                                                     | Lancet. 2009 May 9;373(9675):1623-31. Epub 2009 Apr 9.                                   |    |
| NCT00116350 | Misoprostol for the Treatment of Postpartum Hemorrhage                                                                                                       | Completed  | Yes | 20060161 | Winikoff B, Dabash R, Durocher J, Darwish E, Nguyen TN, LeÄ³n W, Raghavan S, Medhat I, Huynh TK, Barrera G, Blum J.                                                                                                                                               | Lancet. 2010 Jan 16;375(9710):210-6. Epub 2010 Jan 6.                                    |    |
| NCT00117780 | Comparison of Insulin                                                                                                                                        | Completed  | Yes | 18945928 | Le Floch JP, LÄ©vy M,                                                                                                                                                                                                                                             | Diabetes Care. 2009                                                                      |    |



|             |                                                                                                                                  |            |     |          |                                                                                                                                                                         |                                                                                        |    |
|-------------|----------------------------------------------------------------------------------------------------------------------------------|------------|-----|----------|-------------------------------------------------------------------------------------------------------------------------------------------------------------------------|----------------------------------------------------------------------------------------|----|
|             | Detemir Given Once or Twice Daily in Type 1 Diabetes                                                                             |            |     |          | Mosnier-Pudar H, Nobels F, Laroche S, Gonbert S, Eschwege E, Fontaine P; Assessment of Detemir Administration in Progressive Treat-to-Target Trial (ADAPT) Study Group. | Jan;32(1):32-7. Epub 2008 Oct 22.                                                      |    |
| NCT00119080 | Effect of Meningococcal Conjugate Vaccine on Meningococcal Carriage                                                              | Completed  | No  |          |                                                                                                                                                                         |                                                                                        | No |
| NCT00120237 | Misoprostol for the Prevention of Postpartum Hemorrhage in Rural Pakistan                                                        | Completed  | Yes | 21176086 | Mobeen N, Durocher J, Zuberi N, Jahan N, Blum J, Wasim S, Walraven G, Hatcher J.                                                                                        | BJOG. 2011 Feb;118(3):353-61. doi: 10.1111/j.1471-0528.2010.02807.x. Epub 2010 Dec 23. |    |
| NCT00120328 | To Determine the Effects of Avosentan on Doubling of Serum Creatinine, End Stage Renal Disease and Death in Diabetic Nephropathy | Terminated | Yes | 20167702 | Mann JF, Green D, Jamerson K, Ruilope LM, Kuranoff SJ, Littke T, Viberti G; ASCEND Study Group.                                                                         | J Am Soc Nephrol. 2010 Mar;21(3):527-35. Epub 2010 Feb 18.                             |    |
| NCT00122187 | Translation of Colorectal Cancer Screening Guidelines to Practice: A System Intervention                                         | Completed  | Yes | 21327529 | Humphrey LL, Shannon J, Partin MR, O'Malley J, Chen Z, Helfand M.                                                                                                       | J Gen Intern Med. 2011 Jul;26(7):691-7. Epub 2011 Feb 15.                              |    |
| NCT00123903 | COREG MR Versus TOPROL-XL On Reduction Of Microalbuminuria In Patients With Hypertension And Microalbuminuria                    | Completed  | No  |          |                                                                                                                                                                         |                                                                                        | No |
| NCT00124540 | Misoprostol for Preventing Postpartum Hemorrhage                                                                                 | Completed  | Yes | 21130990 | Hofmeyr GJ, Fawole B, Mugerwa K, Godi NP, Blignaut Q, Mangesi L, Singata M, Brady L, Blum J.                                                                            | Int J Gynaecol Obstet. 2011 Feb;112(2):98-102. Epub 2010 Dec 4.                        |    |
| NCT00125736 | A Double-blind, Comparative Study in Patients With Gastric Ulcer to Evaluate the Efficacy of                                     | Completed  | No  |          |                                                                                                                                                                         |                                                                                        | No |

|             |                                                                                                                    |            |     |          |                                                                                                                                                                            |                                                            |    |
|-------------|--------------------------------------------------------------------------------------------------------------------|------------|-----|----------|----------------------------------------------------------------------------------------------------------------------------------------------------------------------------|------------------------------------------------------------|----|
|             | Combination Use of E0671 and Rabeprazole Sodium                                                                    |            |     |          |                                                                                                                                                                            |                                                            |    |
| NCT00127660 | Effect of Nutrition Labeling on Fast Food Choices                                                                  | Completed  | Yes | 19061510 | Harnack LJ, French SA, Oakes JM, Story MT, Jeffery RW, Rydell SA.                                                                                                          | Int J Behav Nutr Phys Act. 2008 Dec 5;5:63.                |    |
| NCT00127998 | Antimalarial Drug Resistance in Mali                                                                               | Completed  | Yes | 19128455 | Kayentao K, Maiga H, Newman RD, McMorrow ML, Hoppe A, Yattara O, Traore H, Kone Y, Guirou EA, Saye R, Traore B, Djimde A, Doumbo OK.                                       | Malar J. 2009 Jan 7;8:5.                                   |    |
| NCT00128934 | Study Evaluating Combination of Levonorgestrel (LNG) and Ethinyl Estradiol (EE) in Premenstrual Dysphoric Disorder | Completed  | Yes | 22067793 | Halbreich U, Freeman EW, Rapkin AJ, Cohen LS, Grubb GS, Bergeron R, Smith L, Mirkin S, Constantine GD.                                                                     | Contraception. 2012 Jan;85(1):19-27. Epub 2011 Jul 13.     |    |
| NCT00130208 | Effect of Sulodexide in Early Diabetic Nephropathy                                                                 | Completed  | Yes | 21872376 | Lewis EJ, Lewis JB, Greene T, Hunsicker LG, Berl T, Pohl MA, de Zeeuw D, Heerspink HL, Rohde RD, Atkins RC, Reutens AT, Packham DK, Raz I; Collaborative Study Group.      | Am J Kidney Dis. 2011 Nov;58(5):729-36. Epub 2011 Aug 26.  |    |
| NCT00130312 | Effect of Sulodexide in Overt Diabetic Nephropathy                                                                 | Terminated | Yes | 22034636 | Packham DK, Wolfe R, Reutens AT, Berl T, Heerspink HL, Rohde R, Ivory S, Lewis J, Raz I, Wiegmann TB, Chan JC, de Zeeuw D, Lewis EJ, Atkins RC; Collaborative Study Group. | J Am Soc Nephrol. 2012 Jan;23(1):123-30. Epub 2011 Oct 27. |    |
| NCT00130806 | An Investigational Drug Co-Administered With Insulin in Patients With Type 2 Diabetes                              | Terminated | No  |          |                                                                                                                                                                            |                                                            | No |
| NCT00130832 | Concomitant Use and Staggered Use of Vaccine and Oral Poliovirus (OPV) in Healthy Infants (V260-014)(COMPLETED)    | Completed  | Yes | 18756184 | Ciarlet M, Sani-Grosso R, Yuan G, Liu GF, Heaton PM, Gottesdiener KM, Arredondo JL, SchÄ¶del F.                                                                            | Pediatr Infect Dis J. 2008 Oct;27(10):874-80.              |    |
| NCT00131430 | An Eighteen Month Efficacy and Safety Study in Obese                                                               | Completed  | No  |          |                                                                                                                                                                            |                                                            | No |

|             |                                                                                                                                                               |            |     |          |                                                                                                                                                                                          |                                                                                                |    |
|-------------|---------------------------------------------------------------------------------------------------------------------------------------------------------------|------------|-----|----------|------------------------------------------------------------------------------------------------------------------------------------------------------------------------------------------|------------------------------------------------------------------------------------------------|----|
|             | Patients                                                                                                                                                      |            |     |          |                                                                                                                                                                                          |                                                                                                |    |
| NCT00132912 | Safety of SCH 530348 in Subjects Undergoing Non-Emergent Percutaneous Coronary Intervention (Study P03573AM1) (COMPLETED)                                     | Completed  | Yes | 19286091 | Becker RC, Moliterno DJ, Jennings LK, Pieper KS, Pei J, Niederman A, Ziada KM, Berman G, Strony J, Joseph D, Mahaffey KW, Van de Werf F, Veltri E, Harrington RA; TRA-PCI Investigators. | Lancet. 2009 Mar 14;373(9667):919-28.                                                          |    |
| NCT00133432 | Zinc and Pneumonia Protocol                                                                                                                                   | Terminated | No  |          |                                                                                                                                                                                          |                                                                                                | No |
| NCT00135213 | PROS Brief Smoking Cessation Counseling in Pediatric Practice to Reduce Secondhand Smoke Exposure of Young Children                                           | Completed  | No  |          |                                                                                                                                                                                          |                                                                                                | No |
| NCT00135941 | Insulin Glargine Plus Insulin Glulisine Multiple Daily Injections (MDI) Versus Premix Insulin Treatment in Subjects With Diabetes Mellitus (Type 1 or Type 2) | Completed  | Yes | 22851487 | Testa MA, Gill J, Su M, Turner RR, Blonde L, Simonson DC.                                                                                                                                | J Clin Endocrinol Metab. 2012 Oct;97(10):3504-14. doi: 10.1210/jc.2012-1763. Epub 2012 Jul 31. |    |
| NCT00136604 | Response to GSK Biologicals' Tritanrix-HepB/Hib-MenAC Vacc (4th Dose) at 15-24m & Mencevax ACWY at 24-30m                                                     | Completed  | No  |          |                                                                                                                                                                                          |                                                                                                | No |
| NCT00139542 | AED Use in Out-of-Hospital Cardiac Arrest: A New Algorithm Named "One Shock Per Minute"                                                                       | Completed  | Yes | 20351239 | Jost D, Degrange H, Verret C, Hersan O, Banville IL, Chapman FW, Lank P, Petit JL, Fuilla C, Migliani R, Carpentier JP; DEFI 2005 Work Group.                                            | Circulation. 2010 Apr 13;121(14):1614-22. Epub 2010 Mar 29.                                    |    |
| NCT00139932 | Tiotropium Bromide Alone vs Tiotropium Bromide and Formoterol Fumarate in Subjects With COPD (Study P04272)                                                   | Completed  | Yes | 19229704 | Tashkin DP, Pearle J, Iezzoni D, Varghese ST.                                                                                                                                            | COPD. 2009 Feb;6(1):17-25.                                                                     |    |

|             |                                                                                                                  |           |     |          |                                                                                                                                                                |                                                           |    |
|-------------|------------------------------------------------------------------------------------------------------------------|-----------|-----|----------|----------------------------------------------------------------------------------------------------------------------------------------------------------------|-----------------------------------------------------------|----|
|             | (COMPLETED)                                                                                                      |           |     |          |                                                                                                                                                                |                                                           |    |
| NCT00142077 | Electronic Health Records for Health Promotion                                                                   | Completed | Yes | 18343794 | Bourgeois FT, Simons WW, Olson K, Brownstein JS, Mandl KD.                                                                                                     | J Med Internet Res. 2008 Mar 14;10(1):e5.                 |    |
| NCT00142584 | Evaluation of the Long-Term Safety and Tolerability of Metoprolol Versus Nebivolol in Patients With Hypertension | Completed | No  |          |                                                                                                                                                                |                                                           | No |
| NCT00147420 | RCT of Zhi Byed 11 (ZB11) Versus Misoprostol in Tibet                                                            | Completed | Yes | 19249659 | Miller S, Tudor C, Thorsten V, Nyima, Kalyang, Sonam, Lhakpen, Droyoung, Quzong K, Dekyi T, Hartwell T, Wright LL, Varner MW.                                  | J Midwifery Womens Health. 2009 Mar-Apr;54(2):133-141.e1. |    |
| NCT00156910 | A Study Using Botulinum Toxin Type A as Headache Prophylaxis for Migraine Patients With Frequent Headaches       | Completed | Yes | 20487038 | Dodick DW, Turkel CC, DeGryse RE, Aurora SK, Silberstein SD, Lipton RB, Diener HC, Brin MF; PREEMPT Chronic Migraine Study Group.                              | Headache. 2010 Jun;50(6):921-36. Epub 2010 May 7.         |    |
| NCT00163449 | Efficacy and Safety of Ciclesonide in Preschool Children With Asthma (2 to 6 Years) (BY9010/M1-207)              | Completed | Yes | 21839625 | Brand PL, Luz GarcÃa-GarcÃa M, Morison A, Vermeulen JH, Weber HC.                                                                                              | Respir Med. 2011 Nov;105(11):1588-95. Epub 2011 Aug 11.   |    |
| NCT00164658 | Evaluating Tools for Health Promotion and Disease Prevention                                                     | Completed | Yes | 19460658 | O'Neill SM, Rubinstein WS, Wang C, Yoon PW, Acheson LS, Rothrock N, Starzyk EJ, Beaumont JL, Galliher JM, Ruffin MT 4th; Family Healthcare Impact Trial group. | Am J Prev Med. 2009 Jun;36(6):506-14.                     |    |
| NCT00168428 | A Study Using Botulinum Toxin Type A as Headache Prophylaxis for Migraine Patients With Frequent Headaches       | Completed | Yes | 20647171 | Diener HC, Dodick DW, Aurora SK, Turkel CC, DeGryse RE, Lipton RB, Silberstein SD, Brin MF; PREEMPT 2 Chronic Migraine Study Group.                            | Cephalalgia. 2010 Jul;30(7):804-14. Epub 2010 Mar 17.     |    |

|             |                                                                                                                                                                                    |            |     |          |                                                                                                                                                                     |                                                                                            |    |
|-------------|------------------------------------------------------------------------------------------------------------------------------------------------------------------------------------|------------|-----|----------|---------------------------------------------------------------------------------------------------------------------------------------------------------------------|--------------------------------------------------------------------------------------------|----|
| NCT00168779 | Randomized, Double-Blind, Placebo-Controlled, Forced-Titration, Comparing Telmisartan vs Valsartan. Taken Orally for Eight Weeks in Patients With Stage 1 and Stage 2 Hypertension | Completed  | Yes | 18199920 | White WB, Murwin D, Chrysant SG, Koval SE, Davidai G, Guthrie R.                                                                                                    | Blood Press Monit. 2008 Feb;13(1):21-7. Erratum in: Blood Press Monit. 2008 Aug;13(4):241. |    |
| NCT00170547 | Comparison of Delivery Routes of Flu Vaccine in Adults                                                                                                                             | Completed  | Yes | 21699951 | Frenc RW Jr, Belshe R, Brady RC, Winokur PL, Campbell JD, Treanor J, Hay CM, Dekker CL, Walter EB Jr, Cate TR, Edwards KM, Hill H, Wolff M, Leduc T, Tornieporth N. | Vaccine. 2011 Aug 5;29(34):5666-74. Epub 2011 Jun 23.                                      |    |
| NCT00170612 | Pneumococcal Vaccination of Fiji Infants                                                                                                                                           | Completed  | Yes | 20199764 | Russell FM, Licciardi PV, Balloch A, Biaukula V, Tikoduadua L, Carapetis JR, Nelson J, Jenney AW, Waqatakirewa L, Colquhoun S, Cheung YB, Tang ML, Mulholland EK.   | Vaccine. 2010 Apr 19;28(18):3086-94. Epub 2010 Mar 1.                                      |    |
| NCT00174720 | Efficacy of Ciclesonide vs Placebo Administered as Once Daily or Twice Daily in Patients Not Treated With Inhaled Corticosteroid.                                                  | Completed  | Yes | 19549432 | Berger WE, Kerwin E, Bernstein DI, Pedinoff A, Bensch G, Karafilidis J.                                                                                             | Allergy Asthma Proc. 2009 May-Jun;30(3):304-14.                                            |    |
| NCT00183053 | Proximity Alarms to Reduce Patient Falls                                                                                                                                           | Completed  | Yes | 23165660 | Shorr RI, Chandler AM, Mion LC, Waters TM, Liu M, Daniels MJ, Kessler LA, Miller ST.                                                                                | Ann Intern Med. 2012 Nov 20;157(10):692-9. doi: 10.7326/0003-4819-157-10-201211200-00005.  |    |
| NCT00187304 | ACTION - Anticoagulation Treatment Influence on Post-Operative Patients                                                                                                            | Terminated | No  |          |                                                                                                                                                                     |                                                                                            | No |
| NCT00195559 | Study Evaluating Combination of Levonorgestrel and Ethinyl Estradiol in Pre-Menstrual                                                                                              | Completed  | Yes | 22152588 | Freeman EW, Halbreich U, Grubb GS, Rapkin AJ, Skouby SO, Smith L, Mirkin S, Constantine GD.                                                                         | Contraception. 2012 May;85(5):437-45. Epub 2011 Dec 5. Review.                             |    |

|             |                                                                                                                        |                        |     |          |                                                                                                                                                          |                                                                   |    |
|-------------|------------------------------------------------------------------------------------------------------------------------|------------------------|-----|----------|----------------------------------------------------------------------------------------------------------------------------------------------------------|-------------------------------------------------------------------|----|
|             | Dysphoric Disorder                                                                                                     |                        |     |          |                                                                                                                                                          |                                                                   |    |
| NCT00197223 | Post-marketing Study to Evaluate the Efficacy of Influenza Vaccine                                                     | Completed              | Yes | 19149900 | Beran J, Wertzova V, Honegr K, Kaliskova E, Havlickova M, Havlik J, Jirincova H, Van Belle P, Jain V, Innis B, Devaster JM.                              | BMC Infect Dis. 2009 Jan 17;9:2.                                  |    |
| NCT00197275 | Lot-to-lot Consistency of Tritanrix?äó-HepB/Hib-MenAC & Its Non-inferiority vs Tritanrix?äó-HepB/Hiberix?äó in Infants | Completed              | No  |          |                                                                                                                                                          |                                                                   | No |
| NCT00197288 | Study Comparing the Immune Response of Fluarix and Fluzone Influenza Vaccines                                          | Completed              | Yes | 21285532 | Campbell JD, Chambers CV, Brady RC, Caldwell MC, Bennett NL, Fourneau MA, Jain VK, Innis BL.                                                             | Hum Vaccin. 2011 Jan 1;7(1):81-8. Epub 2011 Jan 1.                |    |
| NCT00206089 | Melagatran/Ximelagatran Versus Enoxaparin for the Prevention of Venous Thromboembolic Events                           | Terminated             | Yes | 18485453 | Agnelli G, Eriksson BI, Cohen AT, Bergqvist D, Dahl OE, Lassen MR, Mouret P, Rosencher N, Andersson M, Bylock A, Jensen E, Boberg B; EXTEND Study Group. | Thromb Res. 2009;123(3):488-97. Epub 2008 May 15.                 |    |
| NCT00212576 | Promoting Early School Readiness in Primary Health Care                                                                | Completed              | Yes | 21199978 | Mendelsohn AL, Huberman HS, Berkule SB, Brockmeyer CA, Morrow LM, Dreyer BP.                                                                             | Arch Pediatr Adolesc Med. 2011 Jan;165(1):33-41.                  |    |
| NCT00215267 | The Effect of Praziquantel Treatment on Schistosoma Mansoni Morbidity and re-Infection Along Lake Victoria, Uganda     | Completed              | No  |          |                                                                                                                                                          |                                                                   | No |
| NCT00215280 | Epidemiology and Control of Mansonella Perstans Infection in Uganda                                                    | Completed              | Yes | 19081121 | Asio SM, Simonsen PE, Onapa AW.                                                                                                                          | Trans R Soc Trop Med Hyg. 2009 Mar;103(3):274-9. Epub 2008 Dec 9. |    |
| NCT00216242 | Study of the Protective Effect of an Injectable Influenza Vaccine Against Influenza Illness in Adults Under 50 y.o.    | Active, not recruiting | Yes | 20236548 | Jackson LA, Gaglani MJ, Keyserling HL, Balsler J, Bouveret N, Fries L, Treanor JJ.                                                                       | BMC Infect Dis. 2010 Mar 17;10:71.                                |    |
| NCT00217763 | European Study of 3APS in Mild to                                                                                      | Active, not recruiting | No  |          |                                                                                                                                                          |                                                                   | No |

|             |                                                                                                                                                       |            |     |          |                                                                                                                                                                       |                                                              |    |
|-------------|-------------------------------------------------------------------------------------------------------------------------------------------------------|------------|-----|----------|-----------------------------------------------------------------------------------------------------------------------------------------------------------------------|--------------------------------------------------------------|----|
|             | Moderate Alzheimer's Disease Patients                                                                                                                 |            |     |          |                                                                                                                                                                       |                                                              |    |
| NCT00219193 | A Clinical Study to Evaluate the Safety and Efficacy of the Combination of Aliskiren and Valsartan in Hypertensive Non Responders Patients            | Completed  | Yes | 19527323 | Geiger H, Barranco E, Gorostidi M, Taylor A, Zhang X, Xiang Z, Zhang J.                                                                                               | J Clin Hypertens (Greenwich). 2009 Jun;11(6):324-32.         |    |
| NCT00223951 | Safety Study of Ophthalmic Solution in Healthy, Normal Volunteers                                                                                     | Completed  | No  |          |                                                                                                                                                                       |                                                              | No |
| NCT00226785 | Dexmedetomidine for Continuous Sedation                                                                                                               | Terminated | Yes | 18795253 | Ruokonen E, Parviainen I, Jakob SM, Nunes S, Kaukonen M, Shepherd ST, Sarapohja T, Bratty JR, Takala J; Dexmedetomidine for Continuous Sedation" Investigators."      | Intensive Care Med. 2009 Feb;35(2):282-90. Epub 2008 Sep 16. |    |
| NCT00229177 | Study of ONO-2506 in Patients With Acute Ischemic Stroke                                                                                              | Completed  | No  |          |                                                                                                                                                                       |                                                              | No |
| NCT00230776 | A Controlled Pregabalin Trial In Fibromyalgia                                                                                                         | Completed  | Yes | 18524684 | Arnold LM, Russell IJ, Diri EW, Duan WR, Young JP Jr, Sharma U, Martin SA, Barrett JA, Haig G.                                                                        | J Pain. 2008 Sep;9(9):792-805. Epub 2008 Jun 3.              |    |
| NCT00231816 | A Study of an Investigational Zoster Vaccine in Subjects With a History of Varicella (Chickenpox) Given Concomitantly With Another Vaccine (V211-011) | Completed  | Yes | 17908055 | Kerzner B, Murray AV, Cheng E, Ifle R, Harvey PR, Tomlinson M, Barben JL, Rarrick K, Stek JE, Chung MO, SchÅ¶del FP, Wang WW, Xu J, Chan IS, Silber JL, Schlienger K. | J Am Geriatr Soc. 2007 Oct;55(10):1499-507.                  |    |
| NCT00231946 | ALADDIN Study - Phase III: Antigonadotropin-Leuprolide in Alzheimer's Disease Drug INvestigation (VP-AD-301)                                          | Completed  | No  |          |                                                                                                                                                                       |                                                              | No |

|             |                                                                                                                        |           |     |          |                                                                                                            |                                                              |     |
|-------------|------------------------------------------------------------------------------------------------------------------------|-----------|-----|----------|------------------------------------------------------------------------------------------------------------|--------------------------------------------------------------|-----|
| NCT00232947 | Study Comparing Immune Response to, and Safety of, Fluviral and Fluzone Influenza Vaccines in Persons 50 y.o. and Over | Completed | No  |          |                                                                                                            |                                                              | No  |
| NCT00235040 | Evaluating the Effectiveness of the Acute Respiratory Infection Smart Form                                             | Completed | Yes | 20359401 | Linder JA, Schnipper JL, Tsurikova R, Yu T, Volk LA, Melnikas AJ, Palchuk MB, Olsha-Yehiav M, Middleton B. | Inform Prim Care. 2009;17(4):231-40.                         |     |
| NCT00235755 | Retigabine Efficacy and Safety Trial for Partial Onset Refractory Seizures in Epilepsy                                 | Completed | Yes | 20944074 | Brodie MJ, Lerche H, Gil-Nagel A, Elger C, Hall S, Shin P, Nohria V, Mansbach H; RESTORE 2 Study Group.    | Neurology. 2010 Nov 16;75(20):1817-24. Epub 2010 Oct 13.     |     |
| NCT00236184 | E3810-A001-313: Efficacy and Safety of 10 mg Rabeprazole for Treating Heartburn in Frequent Sufferers                  | Completed | No  |          |                                                                                                            |                                                              | Yes |
| NCT00236197 | E3810-A001-312: Efficacy and Safety of 10 mg Rabeprazole for Treating Heartburn in Frequent Sufferers                  | Completed | No  |          |                                                                                                            |                                                              | Yes |
| NCT00237237 | Vildagliptin Compared to Pioglitazone in Combination With Metformin in Patients With Type 2 Diabetes                   | Completed | Yes | 18034842 | Bolli G, Dotta F, Rochotte E, Cohen SE.                                                                    | Diabetes Obes Metab. 2008 Jan;10(1):82-90. Epub 2007 Nov 22. |     |
| NCT00238732 | Study Evaluating Bazedoxifene/Conjugated Estrogen Combinations in Vasomotor Symptoms Associated With Menopause         | Completed | Yes | 19779382 | Kagan R, Williams RS, Pan K, Mirkin S, Pickar JH.                                                          | Menopause. 2010 Mar;17(2):281-9.                             |     |
| NCT00240617 | Study Of Treximet, Formerly Known as Trexima, In The Acute Treatment Of Multiple Migraine Attacks                      | Completed | Yes | 19220307 | Lipton RB, Dodick DW, Adelman JU, Kaniecki RG, Lener SE, White JD, Nelsen AC.                              | Cephalalgia. 2009 Aug;29(8):826-36. Epub 2009 Feb 12.        |     |



|             |                                                                                                                        |           |     |          |                                                                                                                                                                                                   |                                                                |    |
|-------------|------------------------------------------------------------------------------------------------------------------------|-----------|-----|----------|---------------------------------------------------------------------------------------------------------------------------------------------------------------------------------------------------|----------------------------------------------------------------|----|
| NCT00240630 | Treximet (Sumatriptan/Naproxen Sodium), Formerly Known as Trexima, In The Acute Treatment Of Multiple Migraine Attacks | Completed | Yes | 19220307 | Lipton RB, Dodick DW, Adelman JU, Kaniecki RG, Lener SE, White JD, Nelsen AC.                                                                                                                     | Cephalalgia. 2009 Aug;29(8):826-36. Epub 2009 Feb 12.          |    |
| NCT00240643 | Use Of SB424323 With Aspirin In Non-Valvular Atrial Fibrillation In Patients At A Low Or Intermediate Risk For Stroke  | Completed | No  |          |                                                                                                                                                                                                   |                                                                | No |
| NCT00241202 | The Efficacy of the HIV/AIDS Symptom Management Manual                                                                 | Completed | Yes | 18400461 | Wantland DJ, Holzemer WL, Moezzi S, Willard SS, Arudo J, Kirksey KM, Portillo CJ, Corless IB, Rosa ME, Robinson LL, Nicholas PK, Hamilton MJ, Sefcik EF, Human S, Rivero MM, Maryland M, Huang E. | J Pain Symptom Manage. 2008 Sep;36(3):235-46. Epub 2008 Apr 8. |    |
| NCT00242281 | APC-111 MP Tablet Once a Day vs. Penicillin VK Four Times a Day Both for 10 Days in Patients With Strep Throat         | Completed | No  |          |                                                                                                                                                                                                   |                                                                | No |
| NCT00243867 | Taxoprexin Plus Carboplatin Treatment for Advanced Lung Cancer                                                         | Completed | No  |          |                                                                                                                                                                                                   |                                                                | No |
| NCT00244660 | Blood Pressure Reduction in Danish General Practice (BRIDGE)                                                           | Completed | No  |          |                                                                                                                                                                                                   |                                                                | No |
| NCT00245492 | Chromocolonoscopy for the Detection of Flat Adenomas in Routine Colorectal Cancer Screening.                           | Completed | Yes | 20179689 | Kahi CJ, Anderson JC, Waxman I, Kessler WR, Imperiale TF, Li X, Rex DK.                                                                                                                           | Am J Gastroenterol. 2010 Jun;105(6):1301-7. Epub 2010 Feb 23.  |    |
| NCT00245960 | Study Evaluating Etanercept on Skin and Joint Disease in Psoriatic Arthritis                                           | Completed | Yes | 20124563 | Sterry W, Ortonne JP, Kirkham B, Brocq O, Robertson D, Pedersen RD, Estojak J, Molta CT, Freundlich B.                                                                                            | BMJ. 2010 Feb 2;340:c147. doi: 10.1136/bmj.c147.               |    |

|             |                                                                                                                                                                                           |            |     |          |                                                                                                                                    |                                                                  |    |
|-------------|-------------------------------------------------------------------------------------------------------------------------------------------------------------------------------------------|------------|-----|----------|------------------------------------------------------------------------------------------------------------------------------------|------------------------------------------------------------------|----|
| NCT00246025 | A Study of BIBR 1048 in Prevention of Venous Thromboembolism in Patients With TKR Surgery.                                                                                                | Completed  | Yes | 19854610 | Fuji T, Fujita S, Ujihira T, Sato T.                                                                                               | J Arthroplasty. 2010 Dec;25(8):1267-74. Epub 2009 Oct 25.        |    |
| NCT00246909 | Determination of the Minimal Clinically Important Difference After Treatment With Pantoprazole in Patients With Symptoms of Acid Reflux (Gastroesophageal Reflux Disease) (BY1023/M3-340) | Completed  | No  |          |                                                                                                                                    |                                                                  | No |
| NCT00247273 | A Study of Monthly Risedronate for Osteoporosis                                                                                                                                           | Completed  | Yes | 17920005 | Delmas PD, McClung MR, Zanchetta JR, Racewicz A, Roux C, Benhamou CL, Man Z, Eusebio RA, Beary JF, Burgio DE, Matzkin E, Boonen S. | Bone. 2008 Jan;42(1):36-42. Epub 2007 Sep 8.                     |    |
| NCT00247442 | Australian Screening Mammography Decision Aid Trial (ASMDAT)                                                                                                                              | Completed  | Yes | 17954796 | Mathieu E, Barratt A, Davey HM, McGeechan K, Howard K, Houssami N.                                                                 | Arch Intern Med. 2007 Oct 22;167(19):2039-46.                    |    |
| NCT00247962 | Study Evaluating Etanercept and Sulphasalazine in Ankylosing Spondylitis                                                                                                                  | Completed  | Yes | 21630245 | Braun J, van der Horst-Bruinsma IE, Huang F, Burgos-Vargas R, Vlahos B, Koenig AS, Freundlich B.                                   | Arthritis Rheum. 2011 Jun;63(6):1543-51. doi: 10.1002/art.30223. |    |
| NCT00249769 | Determining Safety and Efficacy of Japanese Encephalitis Vaccine When Given With Measles Vaccine                                                                                          | Completed  | Yes | 18394765 | Gatchalian S, Yao Y, Zhou B, Zhang L, Yoksan S, Kelly K, Neuzil KM, YaÃ´ch M, Jacobson J.                                          | Vaccine. 2008 Apr 24;26(18):2234-41. Epub 2008 Mar 18.           |    |
| NCT00249899 | Efficacy of Lapaquistat Acetate Alone or Combined With High-Dose Statin Therapy in Subjects With Hypercholesterolemia                                                                     | Terminated | Yes | 21518985 | Stein EA, Bays H, O'Brien D, Pedicano J, Piper E, Spezzi A.                                                                        | Circulation. 2011 May 10;123(18):1974-85. Epub 2011 Apr 25.      |    |

|             |                                                                                                                                         |           |     |          |                                                                                                                                                                  |                                                                                  |     |
|-------------|-----------------------------------------------------------------------------------------------------------------------------------------|-----------|-----|----------|------------------------------------------------------------------------------------------------------------------------------------------------------------------|----------------------------------------------------------------------------------|-----|
| NCT00251459 | A Study to Evaluate Ranibizumab in Subjects With Choroidal Neovascularization (CNV) Secondary to Age-Related Macular Degeneration (AMD) | Completed | Yes | 19643495 | Boyer DS, Heier JS, Brown DM, Francom SF, Ianchulev T, Rubio RG.                                                                                                 | Ophthalmology. 2009 Sep;116(9):1731-9. Epub 2009 Jul 29.                         |     |
| NCT00251693 | Efficacy and Safety of Dexlansoprazole MR and Lansoprazole on Healing of Erosive Esophagitis                                            | Completed | Yes | 19183157 | Sharma P, Shaheen NJ, Perez MC, Pilmer BL, Lee M, Atkinson SN, Peura D.                                                                                          | Aliment Pharmacol Ther. 2009 Apr 1;29(7):731-41.                                 |     |
| NCT00251719 | Efficacy and Safety of Dexlansoprazole MR and Lansoprazole on Healing of Erosive Esophagitis                                            | Completed | Yes | 19183157 | Sharma P, Shaheen NJ, Perez MC, Pilmer BL, Lee M, Atkinson SN, Peura D.                                                                                          | Aliment Pharmacol Ther. 2009 Apr 1;29(7):731-41.                                 |     |
| NCT00251745 | Efficacy and Safety of Dexlansoprazole Modified Release Formulation to Treat Heartburn                                                  | Completed | No  |          |                                                                                                                                                                  |                                                                                  | Yes |
| NCT00252005 | Oral Direct Factor Xa-inhibitor Apixaban in Patients With Acute Symptomatic Deep-vein Thrombosis-The Botticelli DVT Study               | Completed | Yes | 18541000 | Botticelli Investigators, Writing Committee, Buller H, Deitchman D, Prins M, Segers A.                                                                           | J Thromb Haemost. 2008 Aug;6(8):1313-8. Epub 2008 Jun 6.                         |     |
| NCT00252057 | Testing the Re-Engineered Hospital Discharge                                                                                            | Completed | Yes | 19189907 | Jack BW, Chetty VK, Anthony D, Greenwald JL, Sanchez GM, Johnson AE, Forsythe SR, O'Donnell JK, Paasche-Orlow MK, Manasseh C, Martin S, Culpepper L.             | Ann Intern Med. 2009 Feb 3;150(3):178-87.                                        |     |
| NCT00252304 | Therapeutic Zinc in Childhood Pneumonia                                                                                                 | Completed | Yes | 22392179 | Basnet S, Shrestha PS, Sharma A, Mathisen M, Prasai R, Bhandari N, Adhikari RK, Sommerfelt H, Valentiner-Branth P, Strand TA; Zinc Severe Pneumonia Study Group. | Pediatrics. 2012 Apr;129(4):701-8. doi: 10.1542/peds.2010-3091. Epub 2012 Mar 5. |     |
| NCT00253903 | Efficacy and Safety of Eplivanserin Treatment for Sleep                                                                                 | Completed | No  |          |                                                                                                                                                                  |                                                                                  | No  |

|             |                                                                                                                                                                                                                                                                                    |            |     |          |                                                                                                                                                                                                   |                                                            |    |
|-------------|------------------------------------------------------------------------------------------------------------------------------------------------------------------------------------------------------------------------------------------------------------------------------------|------------|-----|----------|---------------------------------------------------------------------------------------------------------------------------------------------------------------------------------------------------|------------------------------------------------------------|----|
|             | Maintenance Insomnia Followed by Optional Extension up to 1 Year                                                                                                                                                                                                                   |            |     |          |                                                                                                                                                                                                   |                                                            |    |
| NCT00253968 | Efficacy and Safety of Eplivanserin Treatment for Sleep Maintenance Insomnia                                                                                                                                                                                                       | Completed  | No  |          |                                                                                                                                                                                                   |                                                            | No |
| NCT00254046 | TMC125-C206: A Phase III Study to Investigate the Efficacy, Tolerability and Safety of TMC125 as Part of an Antiretroviral Regimen, Including TMC114/Ritonavir and an Investigator-selected Optimized Background, in HIV-1 Infected Patients With Limited to no Treatment Options. | Completed  | Yes | 17617270 | Madruza JV, Cahn P, Grinsztejn B, Haubrich R, Lalezari J, Mills A, Pialoux G, Wilkin T, Peeters M, Vingerhoets J, de Smedt G, Leopold L, Trefiglio R, Woodfall B; DUET-1 study group.             | Lancet. 2007 Jul 7;370(9581):29-38.                        |    |
| NCT00254202 | Efficacy and Safety of Iloperidone Compared With Placebo and Active Control in Subjects With Acute Schizophrenia                                                                                                                                                                   | Completed  | Yes | 19573479 | Volpi S, Potkin SG, Malhotra AK, Licamele L, Lavedan C.                                                                                                                                           | J Clin Psychiatry. 2009 Jun;70(6):801-9.                   |    |
| NCT00254475 | A Study to Evaluate the Efficacy of Valsartan/Simvastatin Combinations in Patients With Both Essential Hypertension and Hypercholesterolemia                                                                                                                                       | Completed  | Yes | 19014834 | Rump LC, Baranova E, Okopien B, Weisskopf M, Kandra A, Ferber P.                                                                                                                                  | Clin Ther. 2008 Oct;30(10):1782-93.                        |    |
| NCT00254891 | Trial of Paclitaxel/Carboplatin + PF-3512676 vs Paclitaxel/Carboplatin Alone in Patients With Advanced Non-Small Cell Lung Cancer                                                                                                                                                  | Terminated | Yes | 21632509 | Hirsh V, Paz-Ares L, Boyer M, Rosell R, Middleton G, Eberhardt WE, Szczesna A, Reiterer P, Saleh M, Arrieta O, Bajetta E, Webb RT, Raats J, Benner RJ, Fowst C, Meech SJ, Readett D, Schiller JH. | J Clin Oncol. 2011 Jul 1;29(19):2667-74. Epub 2011 May 31. |    |

|             |                                                                                                                                                                                                                                                                                    |            |     |          |                                                                                                                                                                                          |                                                                                                         |    |
|-------------|------------------------------------------------------------------------------------------------------------------------------------------------------------------------------------------------------------------------------------------------------------------------------------|------------|-----|----------|------------------------------------------------------------------------------------------------------------------------------------------------------------------------------------------|---------------------------------------------------------------------------------------------------------|----|
| NCT00254904 | Randomized Trial of Gemcitabine/Cisplatin + PF-3512676 vs Gemcitabine/Cisplatin Alone in Patients With Advanced NSCLC                                                                                                                                                              | Terminated | Yes | 21464154 | Manegold C, van Zandwijk N, Szczesna A, Zatloukal P, Au JS, Blasinska-Morawiec M, Serwatowski P, Krzakowski M, Jassem J, Tan EH, Benner RJ, Ingrosso A, Meech SJ, Readett D, Thatcher N. | Ann Oncol. 2012 Jan;23(1):72-7. Epub 2011 Apr 4.                                                        |    |
| NCT00255099 | TMC125-C216: A Phase III Study to Investigate the Efficacy, Tolerability and Safety of TMC125 as Part of an Antiretroviral Regimen, Including TMC114/Ritonavir and an Investigator-selected Optimized Background, in HIV-1 Infected Patients With Limited to no Treatment Options. | Completed  | Yes | 17617271 | Lazzarin A, Campbell T, Clotet B, Johnson M, Katlama C, Moll A, Towner W, Trottier B, Peeters M, Vingerhoets J, de Smedt G, Baeten B, Beets G, Sinha R, Woodfall B; DUET-2 study group.  | Lancet. 2007 Jul 7;370(9581):39-48.                                                                     |    |
| NCT00255190 | Safety and Quality of Life Study of Dexlansoprazole Modified Release Formulation to Treat Heartburn                                                                                                                                                                                | Completed  | Yes | 21118280 | Dabholkar AH, Han C, Paris MM, Perez MC, Atkinson SN, Peura DA.                                                                                                                          | Aliment Pharmacol Ther. 2011 Feb;33(3):366-77. doi: 10.1111/j.1365-2036.2010.04519.x. Epub 2010 Nov 30. |    |
| NCT00259194 | Observation and Prediction of Complications After Coronary Angiography                                                                                                                                                                                                             | Completed  | Yes | 18513345 | May O, Schlosser H, Skytte L.                                                                                                                                                            | J Interv Cardiol. 2008 Aug;21(4):347-9. Epub 2008 May 29.                                               |    |
| NCT00259831 | Efficacy of Cold-FX (CVT-E002) in the Prevention of Upper Respiratory Tract Infections in Healthy Adults                                                                                                                                                                           | Completed  | No  |          |                                                                                                                                                                                          |                                                                                                         | No |
| NCT00260039 | Broad Spectrum HPV Vaccine Dose Ranging Study                                                                                                                                                                                                                                      | Completed  | No  |          |                                                                                                                                                                                          |                                                                                                         | No |
| NCT00260663 | The Hearing Aid Effectiveness After                                                                                                                                                                                                                                                | Completed  | Yes | 20003515 | Collins MP, Souza PE, Liu CF, Heagerty PJ, Amtmann D, Yueh                                                                                                                               | BMC Health Serv Res. 2009 Dec 15;9:233.                                                                 |    |

|             |                                                                                                                                             |                        |     |          |                                                                                                                                        |                                                                                           |     |
|-------------|---------------------------------------------------------------------------------------------------------------------------------------------|------------------------|-----|----------|----------------------------------------------------------------------------------------------------------------------------------------|-------------------------------------------------------------------------------------------|-----|
|             | Aural Rehabilitation (HEAR) Trial                                                                                                           |                        |     |          | B.                                                                                                                                     |                                                                                           |     |
| NCT00260923 | A Dose Ranging Study to Compare the Safety and Efficacy of Aliskiren in Patients With High Blood Pressure                                   | Completed              | Yes | 20110023 | Puig JG, Schunkert H, Taylor AA, Boye S, Jin J, Keefe DL.                                                                              | Clin Ther. 2009 Dec;31(12):2839-50.                                                       |     |
| NCT00261495 | A Study of the Effectiveness and Safety of Sustained-Release Hydromorphone (a Strong Opioid) in Patients With Chronic Noncancer Pain.       | Completed              | Yes | 20384968 | Binsfeld H, Szczepanski L, Waechter S, Richarz U, Sabatowski R.                                                                        | Pain Pract. 2010 Sep-Oct;10(5):404-15. doi: 10.1111/j.1533-2500.2009.00342.x.             |     |
| NCT00262067 | A Study Evaluating the Efficacy and Safety of Bevacizumab in Combination With Chemotherapy in Untreated Metastatic Breast Cancer (RIBBON 1) | Active, not recruiting | Yes | 21383283 | Robert NJ, DiÃ©ras V, Glaspy J, Brufsky AM, Bondarenko I, Lipatov ON, Perez EA, Yardley DA, Chan SY, Zhou X, Phan SC, O'Shaughnessy J. | J Clin Oncol. 2011 Apr 1;29(10):1252-60. doi: 10.1200/JCO.2010.28.0982 . Epub 2011 Mar 7. |     |
| NCT00263393 | Rural Andhra Pradesh Cardiovascular Prevention Study (RAPCAPS)                                                                              | Active, not recruiting | Yes | 22440219 | Joshi R, Chow CK, Raju PK, Raju KR, Gottumukkala AK, Reddy KS, Macmahon S, Heritier S, Li Q, Dandona R, Neal B.                        | J Am Coll Cardiol. 2012 Mar 27;59(13):1188-96. No abstract available.                     |     |
| NCT00264147 | Rheumatoid Arthritis Dose Ranging Study                                                                                                     | Completed              | Yes | 21905970 | Greenwald M, Peloso PM, Mandel D, Soto O, Mehta A, Frontera N, Boice JA, Zhan XJ, Curtis SP.                                           | Curr Med Res Opin. 2011 Oct;27(10):2033-42. Epub 2011 Sep 12.                             |     |
| NCT00264303 | CUTE (Chronic Urticaria Treatment Evaluation)                                                                                               | Completed              | Yes | 19053988 | Potter PC, Kapp A, Maurer M, Guillet G, Jian AM, Hauptmann P, Finlay AY.                                                               | Allergy. 2009 Apr;64(4):596-604. Epub 2008 Nov 11.                                        |     |
| NCT00266032 | Study on Safety and Efficacy of an Oral Contraceptive in Long Cycles                                                                        | Completed              | No  |          |                                                                                                                                        |                                                                                           | Yes |
| NCT00267254 | A Clinical Trial Comparing Torcetrapib/Atorvastat                                                                                           | Completed              | No  |          |                                                                                                                                        |                                                                                           | No  |

|             |                                                                                                                             |                        |     |          |                                                                                                                                                       |                                                                                        |    |
|-------------|-----------------------------------------------------------------------------------------------------------------------------|------------------------|-----|----------|-------------------------------------------------------------------------------------------------------------------------------------------------------|----------------------------------------------------------------------------------------|----|
|             | in To Simvastatin In Subjects With High Cholesterol.                                                                        |                        |     |          |                                                                                                                                                       |                                                                                        |    |
| NCT00267267 | A Clinical Trial Comparing Torcetrapib/Atorvastatin in to Ezetimibe/Simvastatin In Subjects With A Cholesterol Disorder.    | Terminated             | No  |          |                                                                                                                                                       |                                                                                        | No |
| NCT00267280 | A Clinical Trial Comparing Torcetrapib/Atorvastatin in To Simvastatin In Subjects With High Cholesterol (A5091031).         | Terminated             | No  |          |                                                                                                                                                       |                                                                                        | No |
| NCT00267969 | A Study of the Safety and Efficacy of CNTO 1275 in Patients With Severe Plaque-Type Psoriasis                               | Active, not recruiting | Yes | 18486739 | Leonardi CL, Kimball AB, Papp KA, Yeilding N, Guzzo C, Wang Y, Li S, Dooley LT, Gordon KB; PHOENIX 1 study investigators.                             | Lancet. 2008 May 17;371(9625):1665-74. Erratum in: Lancet. 2008 May 31;371(9627):1838. |    |
| NCT00268879 | Investigation of the Safety and Efficacy of Renzapride in Constipation Predominant Irritable Bowel Syndrome (IBS)           | Completed              | Yes | 20163375 | Lembo AJ, Cremonini F, Meyers N, Hickling R.                                                                                                          | Aliment Pharmacol Ther. 2010 May;31(9):979-90. Epub 2010 Feb 16.                       |    |
| NCT00269204 | Lipid Efficacy/Tolerability Study                                                                                           | Completed              | Yes | 19166443 | Maccubbin D, Bays HE, Olsson AG, Elinoff V, Elis A, Mitchel Y, Sirah W, Betteridge A, Reyes R, Yu Q, Kuznetsova O, Sisk CM, Pasternak RC, Paolini JF. | Int J Clin Pract. 2008 Dec;62(12):1959-70.                                             |    |
| NCT00269217 | Lipid Efficacy Study                                                                                                        | Completed              | Yes | N/a      | Ballantyne, C., Gleim, G., Liu, N., McCrary Sisk, C., Johnson-Levonas, A. O., Mitchel, Y                                                              | Journal of Clinical Lipidology. 2011; 6(3):235-243.                                    |    |
| NCT00269412 | Study to Assess the Efficacy and Safety of Rifaximin Administered BID in the Treatment of Patients With Diarrhea-Associated | Completed              | No  |          |                                                                                                                                                       |                                                                                        | No |

|             |                                                                                                                                              |            |     |          |                                                                                                                                                                         |                                                                 |     |
|-------------|----------------------------------------------------------------------------------------------------------------------------------------------|------------|-----|----------|-------------------------------------------------------------------------------------------------------------------------------------------------------------------------|-----------------------------------------------------------------|-----|
|             | Irritable Bowel Syndrome                                                                                                                     |            |     |          |                                                                                                                                                                         |                                                                 |     |
| NCT00269828 | A Survival Study for Women With Advanced Lung Cancer Who Have Not Previously Received Chemotherapy.                                          | Terminated | No  |          |                                                                                                                                                                         |                                                                 | No  |
| NCT00272155 | An Intervention to Reduce Inappropriate Prescriptions of Antibiotics for Respiratory Infections in General Practice                          | Completed  | No  |          |                                                                                                                                                                         |                                                                 | No  |
| NCT00273052 | COREG MR Versus TOPROL-XL On The Lipid Profile Of Normolipidemic Or Mildly Dyslipidemic Patients With Hypertension                           | Completed  | No  |          |                                                                                                                                                                         |                                                                 | Yes |
| NCT00273338 | DN-101 in Combination With Docetaxel in Androgen-Independent Prostate Cancer (AIPC) (AIPC Study of Calcitriol Enhancing Taxotere [ASCENT-2]) | Terminated | Yes | 21483004 | Scher HI, Jia X, Chi K, de Wit R, Berry WR, Albers P, Henick B, Waterhouse D, Ruether DJ, Rosen PJ, Meluch AA, Nordquist LT, Venner PM, Heidenreich A, Chu L, Heller G. | J Clin Oncol. 2011 Jun 1;29(16):2191-8. Epub 2011 Apr 11.       |     |
| NCT00273468 | To Study the Safety and Effectiveness of a Granisetron Patch to Treat Chemotherapy-Induced Nausea and Vomiting (CINV)                        | Completed  | Yes | 20835873 | Boccia RV, Gordan LN, Clark G, Howell JD, Grunberg SM; Sancuso Study Group.                                                                                             | Support Care Cancer. 2011 Oct;19(10):1609-17. Epub 2010 Sep 12. |     |
| NCT00276094 | A Clinical Study to Evaluate Ospemifene in the Treatment of Vulvar and Vaginal Atrophy in Postmenopausal Women                               | Completed  | Yes | 20032798 | Bachmann GA, Komi JO; Ospemifene Study Group.                                                                                                                           | Menopause. 2010 May-Jun;17(3):480-6.                            |     |



|             |                                                                                                                                    |           |     |          |                                                                                                    |                                                                                             |    |
|-------------|------------------------------------------------------------------------------------------------------------------------------------|-----------|-----|----------|----------------------------------------------------------------------------------------------------|---------------------------------------------------------------------------------------------|----|
| NCT00276484 | To Evaluate Ezetimibe Plus Atorvastatin Versus Atorvastatin in Patients With High Cholesterol Not Controlled on Atorvastatin 40 mg | Completed | Yes | 19026303 | Leiter LA, Bays H, Conard S, Bird S, Rubino J, Hanson ME, Tomassini JE, Tershakovec AM.            | Am J Cardiol. 2008 Dec 1;102(11):1495-501. Epub 2008 Oct 23.                                |    |
| NCT00277914 | Flibanserin Randomized Withdrawal Trial in Pre-Menopausal Women                                                                    | Completed | Yes | 21933348 | Goldfischer ER, Breaux J, Katz M, Kaufman J, Smith WB, Kimura T, Sand M, Pyke R.                   | J Sex Med. 2011 Nov;8(11):3160-72. doi: 10.1111/j.1743-6109.2011.02458.x. Epub 2011 Sep 20. |    |
| NCT00281580 | Telmisartan (Micardis) and Amlodipine (Norvasc) - Factorial Design Study for the Treatment of Hypertension                         | Completed | Yes | 19614805 | Littlejohn TW 3rd, Majul CR, Olvera R, Seeber M, Kobe M, Guthrie R, Oigman W; Study Investigators. | J Clin Hypertens (Greenwich). 2009 Apr;11(4):207-13.                                        |    |
| NCT00281593 | Telmisartan (Micardis) and Ramipril (Altace) - Factorial Design Study for the Treatment of Hypertension                            | Completed | No  |          |                                                                                                    |                                                                                             | No |
| NCT00282295 | US-licensed Combined Vaccine Against Tetanus & Diphtheria, Given With US-licensed Vaccine Against Meningococcal Disease            | Completed | Yes | 21134450 | Weston WM, Friedland LR, Wu X, Howe B.                                                             | Vaccine. 2011 Jan 29;29(5):1017-22. Epub 2010 Dec 4.                                        |    |
| NCT00282932 | Detrol LA In Men With Overactive Bladder.                                                                                          | Completed | Yes | 19070418 | Chapple C, Herschorn S, Abrams P, Sun F, Brodsky M, Guan Z.                                        | Eur Urol. 2009 Sep;56(3):534-41. Epub 2008 Nov 24.                                          |    |
| NCT00282984 | Efficacy and Safety of Varenicline in Smokers With Cardiovascular Disease Who Wish to Quit Smoking                                 | Completed | Yes | 20048210 | Rigotti NA, Pipe AL, Benowitz NL, Arteaga C, Garza D, Tonstad S.                                   | Circulation. 2010 Jan 19;121(2):221-9. Epub 2010 Jan 4.                                     |    |
| NCT00283127 | Home Sampling Versus Conventional Sampling for                                                                                     | Completed | Yes | 22747602 | KlÅ_vstad H, Grjibovski A, Aavitsland P.                                                           | BMC Infect Dis. 2012 Jul 2;12:150. doi: 10.1186/1471-2334-12-150.                           |    |

|             |                                                                                                                         |                        |     |          |                                                                                                                                                    |                                                                            |    |
|-------------|-------------------------------------------------------------------------------------------------------------------------|------------------------|-----|----------|----------------------------------------------------------------------------------------------------------------------------------------------------|----------------------------------------------------------------------------|----|
|             | Screening of Urogenital Chlamydia Trachomatis in Young Men and Women.                                                   |                        |     |          |                                                                                                                                                    |                                                                            |    |
| NCT00283660 | Zinc, Mental Health, and School Performance in Guatemalan Schoolchildren                                                | Completed              | Yes | 20881069 | DiGirolamo AM, Ramirez-Zea M, Wang M, Flores-Ayala R, Martorell R, Neufeld LM, Ramakrishnan U, Sellen D, Black MM, Stein AD.                       | Am J Clin Nutr. 2010 Nov;92(5):1241-50. Epub 2010 Sep 29.                  |    |
| NCT00283738 | MIST II PFO-Bioabsorbable Septal Repair Implant                                                                         | Active, not recruiting | No  |          |                                                                                                                                                    |                                                                            | No |
| NCT00283946 | A Double-Blind, Group-Comparison Study Using Zolpidem (Myslee) as a Comparative Drug in Patients With Insomnia          | Completed              | No  |          |                                                                                                                                                    |                                                                            | No |
| NCT00286442 | Efficacy and Safety of Alogliptin Combined With Metformin in Participants With Type 2 Diabetes Mellitus                 | Completed              | Yes | 19125992 | Nauck MA, Ellis GC, Fleck PR, Wilson CA, Mekki Q; Alogliptin Study 008 Group.                                                                      | Int J Clin Pract. 2009 Jan;63(1):46-55.                                    |    |
| NCT00286468 | Study of Alogliptin Combined With Sulfonylurea in Subjects With Type 2 Diabetes Mellitus.                               | Completed              | Yes | 19125778 | Pratley RE, Kipnes MS, Fleck PR, Wilson C, Mekki Q; Alogliptin Study 007 Group.                                                                    | Diabetes Obes Metab. 2009 Feb;11(2):167-76.                                |    |
| NCT00286481 | Efficacy of Lapaquistat Acetate Alone or Combined With Simvastatin in Subjects With Hypercholesterolemia                | Completed              | Yes |          |                                                                                                                                                    |                                                                            |    |
| NCT00286897 | The Efficacy, Safety and Tolerability of E2007 in Levodopa Treated Parkinson's Disease Patients With Motor Fluctuations | Completed              | Yes | 22161845 | Lees A, Fahn S, Eggert KM, Jankovic J, Lang A, Micheli F, Mouradian MM, Oertel WH, Olanow CW, Poewe W, Rascol O, Tolosa E, Squillacote D, Kumar D. | Mov Disord. 2012 Feb;27(2):284-8. doi: 10.1002/mds.23983. Epub 2011 Dec 9. |    |

|             |                                                                                                                           |            |     |          |                                                                                                                                                 |                                                                   |    |
|-------------|---------------------------------------------------------------------------------------------------------------------------|------------|-----|----------|-------------------------------------------------------------------------------------------------------------------------------------------------|-------------------------------------------------------------------|----|
| NCT00287092 | Comparison of Safety and Immunogenicity of Pediacel? and Infanrix? IPV+Hib (Penta) Given in a 3 Dose Schedule in Infants  | Completed  | No  |          |                                                                                                                                                 |                                                                   | No |
| NCT00289601 | Randomized Study of Aspirin Resistant Patients Undergoing Angioplasty                                                     | Terminated | No  |          |                                                                                                                                                 |                                                                   | No |
| NCT00289783 | Safety and Immunogenicity Study of Hib-MenCY-TT Vaccine Compared to Licensed Hib Conjugate Vaccine                        | Completed  | Yes | 21624883 | Bryant KA, Marshall GS, Marchant CD, Pavia-Ruiz N, Nolan T, Rinderknecht S, Blatter M, Aris E, Lestrade P, Boutriau D, Friedland LR, Miller JM. | Pediatrics. 2011 Jun;127(6):e1375-85. Epub 2011 May 29.           |    |
| NCT00289848 | MK0431 Monotherapy Study in Patients With Type 2 Diabetes Mellitus                                                        | Completed  | Yes | 19097665 | Mohan V, Yang W, Son HY, Xu L, Noble L, Langdon RB, Amatruda JM, Stein PP, Kaufman KD.                                                          | Diabetes Res Clin Pract. 2009 Jan;83(1):106-16. Epub 2008 Dec 20. |    |
| NCT00290563 | A Multicenter, Double-Blind, Randomized, Placebo-Controlled, Phase II Study of MK0594 in Patients With Overactive Bladder | Completed  | Yes | 20639026 | Frenkl TL, Zhu H, Reiss T, Seltzer O, Rosenberg E, Green S.                                                                                     | J Urol. 2010 Aug;184(2):616-22. Epub 2010 Jun 19.                 |    |
| NCT00290901 | Celebrex vs Tramadol in the Treatment of Chronic Lower Back Pain.                                                         | Completed  | Yes | 20146877 | O'Donnell JB, Ekman EF, Spalding WM, Bhadra P, McCabe D, Berger MF.                                                                             | J Int Med Res. 2009 Nov-Dec;37(6):1789-802.                       |    |
| NCT00293046 | Assessment of Grazax? Treatment Compliance                                                                                | Completed  | No  |          |                                                                                                                                                 |                                                                   | No |
| NCT00293618 | Implementation Study of the PostOperative Nausea and Vomiting Prediction Rule                                             | Completed  | Yes | 21840522 | van Dijk JF, van Wijck AJ, Kappen TH, Peelen LM, Kalkman CJ, Schuurmans MJ.                                                                     | Int J Nurs Stud. 2012 Jan;49(1):65-71. Epub 2011 Aug 15.          |    |
| NCT00293826 | A Multiple Dose Study to Evaluate Subcutaneous AMG 108 in Subjects With Rheumatoid Arthritis                              | Completed  | Yes | 20950476 | Cardiel MH, Tak PP, Bensen W, Burch FX, Forejtova S, Badurski JE, Kakkar T, Bevirt T, Ni L, McCroskery E, Jahreis A, Zack DJ.                   | Arthritis Res Ther. 2010;12(5):R192. Epub 2010 Oct 15.            |    |

|             |                                                                                                                                           |            |     |          |                                                                                                                        |                                                                                      |    |
|-------------|-------------------------------------------------------------------------------------------------------------------------------------------|------------|-----|----------|------------------------------------------------------------------------------------------------------------------------|--------------------------------------------------------------------------------------|----|
| NCT00294099 | H5 Vaccine Alone or With Aluminum Hydroxide in Elderly Adults                                                                             | Completed  | Yes | 19577636 | Brady RC, Treanor JJ, Atmar RL, Keitel WA, Edelman R, Chen WH, Winokur P, Belshe R, Graham IL, Noah DL, Guo K, Hill H. | Vaccine. 2009 Aug 13;27(37):5091-5. Epub 2009 Jul 3.                                 |    |
| NCT00294905 | Implementation of an Evidence Based Smoking Cessation Strategy (SMOCC) for Patients With COPD in Primary Care                             | Terminated | No  |          |                                                                                                                        |                                                                                      | No |
| NCT00295633 | A Study Assessing Saxagliptin Treatment in Type 2 Diabetic Subjects Who Are Not Controlled With TZD Therapy Alone                         | Completed  | Yes | 19864452 | Hollander P, Li J, Allen E, Chen R; CV181-013 Investigators.                                                           | J Clin Endocrinol Metab. 2009 Dec;94(12):4810-9. Epub 2009 Oct 28.                   |    |
| NCT00295750 | The Efficacy and Safety of Degarelix One Month Dosing Regimens in Prostate Cancer                                                         | Completed  | Yes | 19035858 | Klotz L, Boccon-Gibod L, Shore ND, Andreou C, Persson BE, Cantor P, Jensen JK, Olesen TK, Schröder FH.                 | BJU Int. 2008 Dec;102(11):1531-8.                                                    |    |
| NCT00296634 | H5 Vaccine Alone or With Adjuvant in Healthy Adults                                                                                       | Completed  | Yes | 18808338 | Keitel WA, Campbell JD, Treanor JJ, Walter EB, Patel SM, He F, Noah DL, Hill H.                                        | J Infect Dis. 2008 Nov 1;198(9):1309-16.                                             |    |
| NCT00297102 | Effect of Roflumilast on Exacerbation Rate in Patients With Chronic Obstructive Pulmonary Disease (COPD): The AURA Study (BY217/M2-124)   | Completed  | Yes | 19716960 | Calverley PM, Rabe KF, Goehring UM, Kristiansen S, Fabbri LM, Martinez FJ; M2-124 and M2-125 study groups.             | Lancet. 2009 Aug 29;374(9691):685-94. Erratum in: Lancet. 2010 Oct 2;376(9747):1146. |    |
| NCT00297115 | Effect of Roflumilast on Exacerbation Rate in Patients With Chronic Obstructive Pulmonary Disease (COPD): The HERMES Study (BY217/M2-125) | Completed  | Yes | 19716960 | Calverley PM, Rabe KF, Goehring UM, Kristiansen S, Fabbri LM, Martinez FJ; M2-124 and M2-125 study groups.             | Lancet. 2009 Aug 29;374(9691):685-94. Erratum in: Lancet. 2010 Oct 2;376(9747):1146. |    |
| NCT00297973 | Cardiovascular Risk Assessment in Patients Treated With Caduet                                                                            | Completed  | No  |          |                                                                                                                        |                                                                                      | No |

|             |                                                                                                                                                  |           |     |          |                                                                                                                                                        |                                                            |    |
|-------------|--------------------------------------------------------------------------------------------------------------------------------------------------|-----------|-----|----------|--------------------------------------------------------------------------------------------------------------------------------------------------------|------------------------------------------------------------|----|
| NCT00298974 | A Study of Pain Relief in Osteoarthritis                                                                                                         | Completed | No  |          |                                                                                                                                                        |                                                            | No |
| NCT00299013 | Study of COLAL-PRED?« in the Treatment of Moderate Acute Ulcerative Colitis                                                                      | Completed | No  |          |                                                                                                                                                        |                                                            | No |
| NCT00300430 | Study to Evaluate the Long-Term Safety and Efficacy of ABT-335, in Combination With Three Different Statins in Subjects With Mixed Dyslipidemia. | Completed | Yes | 21291776 | Bays HE, Jones PH, Mohiuddin SM, Kelly MT, Sun H, Setze CM, Buttler SM, Sleep DJ, Stolzenbach JC.                                                      | J Clin Lipidol. 2008 Dec;2(6):426-35. Epub 2008 Nov 12.    |    |
| NCT00300456 | Evaluate Safety and Efficacy of ABT-335 in Combination With Simvastatin in Subjects With Multiple Abnormal Lipid Levels in the Blood             | Completed | Yes | 19081418 | Mohiuddin SM, Pepine CJ, Kelly MT, Buttler SM, Setze CM, Sleep DJ, Stolzenbach JC.                                                                     | Am Heart J. 2009 Jan;157(1):195-203. Epub 2008 Nov 20.     |    |
| NCT00300469 | Evaluate Safety and Efficacy of ABT-335 in Combination With Atorvastatin in Subjects With Multiple Abnormal Lipid Levels in the Blood            | Completed | Yes | 19195513 | Goldberg AC, Bays HE, Ballantyne CM, Kelly MT, Buttler SM, Setze CM, Sleep DJ, Stolzenbach JC.                                                         | Am J Cardiol. 2009 Feb 15;103(4):515-22. Epub 2008 Dec 26. |    |
| NCT00300482 | Evaluate Safety and Efficacy of ABT-335 in Combination With Rosuvastatin Calcium in Subjects With Multiple Abnormal Lipid Levels in the Blood    | Completed | Yes | 18996523 | Jones PH, Davidson MH, Kashyap ML, Kelly MT, Buttler SM, Setze CM, Sleep DJ, Stolzenbach JC.                                                           | Atherosclerosis. 2009 May;204(1):208-15. Epub 2008 Oct 5.  |    |
| NCT00301015 | Rapid Diagnostic Testing and Artemisinin-Based Combination Therapy for Uncomplicated Malaria by                                                  | Completed | Yes | 21750697 | Mubi M, Janson A, Warsame M, MÅ¥rtensson A, KÅ¶llander K, Petzold MG, Ngasala B, Maganga G, Gustafsson LL, Massele A, Tomson G, Premji Z, BjÅ¶rkman A. | PLoS One. 2011;6(7):e19753. Epub 2011 Jul 5.               |    |

|             |                                                                                                                                          |            |     |          |                                                                                                                                        |                                                                        |    |
|-------------|------------------------------------------------------------------------------------------------------------------------------------------|------------|-----|----------|----------------------------------------------------------------------------------------------------------------------------------------|------------------------------------------------------------------------|----|
|             | Community Health Workers                                                                                                                 |            |     |          |                                                                                                                                        |                                                                        |    |
| NCT00301431 | Study Evaluating the Efficacy of DVS-233 in Fibromyalgia                                                                                 | Terminated | No  |          |                                                                                                                                        |                                                                        | No |
| NCT00305487 | Safety and Efficacy of Ciclesonide in Pediatric Patients (6 to 11 Years of Age) With Seasonal Allergic Rhinitis (BY9010/M1-417)          | Completed  | Yes | N/a      | Berger, W. E., Nayak, A., Lanier, B. Q., Kaiser, H. B., LaForce, C., Darken, P., Hall, N., Wingertzahn, M                              | Pediatric Asthma, Allergy & Immunology. 2008; 21(2): 73-82.            |    |
| NCT00306254 | Evaluation of PD 0348292 for Preventing Blood Clots in the Lungs or Deep Leg Veins of Patients After Knee Surgery                        | Completed  | No  |          |                                                                                                                                        |                                                                        | No |
| NCT00306787 | Efficacy and Safety of Famciclovir 1-day Treatment Compared to 3-day Treatment With Valacyclovir in Adults With Recurrent Genital Herpes | Completed  | Yes | 18637755 | Abudalu M, Tyring S, Koltun W, Bodsworth N, Hamed K.                                                                                   | Clin Infect Dis. 2008 Sep 1;47(5):651-8.                               |    |
| NCT00306956 | Influence of Pacifiers on Breastfeeding Duration                                                                                         | Completed  | Yes | 19464025 | Jenik AG, Vain NE, Gorestein AN, Jacobi NE; Pacifier and Breastfeeding Trial Group.                                                    | J Pediatr. 2009 Sep;155(3):350-4.e1. Epub 2009 May 21.                 |    |
| NCT00308581 | Certolizumab in Crohn's Disease Patients With Loss of Response or Intolerance to Infliximab                                              | Completed  | Yes | 20451663 | Sandborn WJ, Abreu MT, D'Haens G, Colombel JF, Vermeire S, Mitchev K, Jamoul C, Fedorak RN, Spehlmann ME, Wolf DC, Lee S, Rutgeerts P. | Clin Gastroenterol Hepatol. 2010 Aug;8(8):688-695.e2. Epub 2010 May 6. |    |
| NCT00308711 | Safety/Efficacy Study Comparing the Misoprostol Vaginal Insert to Cervidil for Cervical Ripening and Induction of Labor                  | Completed  | Yes | 18827122 | Wing DA; Misoprostol Vaginal Insert Consortium.                                                                                        | Obstet Gynecol. 2008 Oct;112(4):801-12.                                |    |
| NCT00312286 | Efficacy of 851B Gel for Treating High-Risk                                                                                              | Terminated | No  |          |                                                                                                                                        |                                                                        | No |

|             |                                                                                                                                                                        |           |     |          |                                                                                                                                                                                                                                                                    |                                                                                                                |     |
|-------------|------------------------------------------------------------------------------------------------------------------------------------------------------------------------|-----------|-----|----------|--------------------------------------------------------------------------------------------------------------------------------------------------------------------------------------------------------------------------------------------------------------------|----------------------------------------------------------------------------------------------------------------|-----|
|             | Cervical Human Papillomavirus Infection in Women.                                                                                                                      |           |     |          |                                                                                                                                                                                                                                                                    |                                                                                                                |     |
| NCT00312494 | 3-week Study to Evaluate Efficacy and Safety of Ziprasidone With Either Lithium or Divalproex in Acutely Manic Subjects                                                | Completed | No  |          |                                                                                                                                                                                                                                                                    |                                                                                                                | Yes |
| NCT00312858 | Concomitant Use of Hepatitis A Vaccine With Measles, Mumps, Rubella and Varicella Vaccine and Pneumococcal 7-Valent Conjugate Vaccine in Healthy 12-Month-Old Children | Completed | No  |          |                                                                                                                                                                                                                                                                    |                                                                                                                | Yes |
| NCT00313209 | Effect of Roflumilast on Lung Function in Chronic Obstructive Pulmonary Disease (COPD) Patients Treated With Salmeterol: The EOS Study (BY217/M2-127)                  | Completed | Yes | 19716961 | Fabbri LM, Calverley PM, Izquierdo-Alonso JL, Bundschuh DS, Brose M, Martinez FJ, Rabe KF; M2-127 and M2-128 study groups.                                                                                                                                         | Lancet. 2009 Aug 29;374(9691):695-703.                                                                         |     |
| NCT00313300 | Safety Study of Apixaban in Recent Acute Coronary Syndrome                                                                                                             | Completed | Yes | 19470889 | APPRAISE Steering Committee and Investigators, Alexander JH, Becker RC, Bhatt DL, Cools F, Crea F, Dellborg M, Fox KA, Goodman SG, Harrington RA, Huber K, Husted S, Lewis BS, Lopez-Sendon J, Mohan P, Montalescot G, Ruda M, Ruzyllo W, Verheugt F, Wallentin L. | Circulation. 2009 Jun 9;119(22):2877-85. Epub 2009 May 26.                                                     |     |
| NCT00313313 | A Study of Saxagliptin in Subjects With Type 2 Diabetes Who Have Inadequate Blood Sugar Control With Sulfonylureas                                                     | Completed | Yes | 19614786 | Chacra AR, Tan GH, Apanovitch A, Ravichandran S, List J, Chen R; CV181-040 Investigators.                                                                                                                                                                          | Int J Clin Pract. 2009 Sep;63(9):1395-406. Epub 2009 Jul 15. Erratum in: Int J Clin Pract. 2010 Jan;64(2):277. |     |

|             |                                                                                                                                             |           |     |          |                                                                                                                             |                                                                          |    |
|-------------|---------------------------------------------------------------------------------------------------------------------------------------------|-----------|-----|----------|-----------------------------------------------------------------------------------------------------------------------------|--------------------------------------------------------------------------|----|
| NCT00313911 | Safety of DTaP-IPV-HB-PRP~T Combined Vaccine Compared to Tritanrix-HepB/Hib and OPV Given at Age 2, 4, and 6 Months.                        | Completed | Yes | 22531237 | MacÃas M, Lanata CF, Zambrano B, Gil AI, Amemiya I, Mispireta M, Ecker L, Santos-Lima E.                                    | Pediatr Infect Dis J. 2012 Aug;31(8):e126-32.                            |    |
| NCT00314249 | Study of Milnacipran for the Treatment of Fibromyalgia                                                                                      | Completed | Yes | 20496365 | Arnold LM, Gendreau RM, Palmer RH, Gendreau JF, Wang Y.                                                                     | Arthritis Rheum. 2010 Sep;62(9):2745-56.                                 |    |
| NCT00314951 | Fidaxomicin Versus Vancomycin for the Treatment of Clostridium Difficile-Associated Diarrhea (CDAD)                                         | Completed | Yes | 21288078 | Louie TJ, Miller MA, Mullane KM, Weiss K, Lentnek A, Golan Y, Gorbach S, Sears P, Shue YK; OPT-80-003 Clinical Study Group. | N Engl J Med. 2011 Feb 3;364(5):422-31.                                  |    |
| NCT00314964 | Study Evaluating PD-0299685 for the Treatment of Vasomotor Symptoms (Hot Flashes / Flushes) Associated With Menopause                       | Completed | No  |          |                                                                                                                             |                                                                          | No |
| NCT00316524 | A Randomized, Double-Blind, Placebo-Controlled Study on Immunogenicity and Safety of MVA-BN (IMVAMUNE) Smallpox Vaccine in Healthy Subjects | Completed | No  |          |                                                                                                                             |                                                                          | No |
| NCT00317044 | Safety and Efficacy Study to Determine Anti-Asthmatic Effect of Esomeprazole Magnesium; Nexium Reflux Asthma                                | Completed | Yes | 20110554 | Kiljander TO, Junghard O, Beckman O, Lind T.                                                                                | Am J Respir Crit Care Med. 2010 May 15;181(10):1042-8. Epub 2010 Jan 28. |    |
| NCT00317590 | Effectiveness and Cost-Effectiveness of a Rapid Diagnostic Test for Malaria                                                                 | Completed | Yes | 19222821 | Bisoffi Z, Sirima BS, Angheben A, Lodesani C, Gobbi F, Tinto H, Van den Ende J.                                             | Trop Med Int Health. 2009 May;14(5):491-8.                               |    |
| NCT00318422 | Effect of Liraglutide on Blood Glucose                                                                                                      | Completed | Yes | 19317822 | Marre M, Shaw J, BrÃndle M, Bebakar WM, Kamaruddin NA,                                                                      | Diabet Med. 2009 Mar;26(3):268-78.                                       |    |



|             |                                                                                                                                                                                  |           |     |          |                                                                                                                                                                                                |                                                                                                       |     |
|-------------|----------------------------------------------------------------------------------------------------------------------------------------------------------------------------------|-----------|-----|----------|------------------------------------------------------------------------------------------------------------------------------------------------------------------------------------------------|-------------------------------------------------------------------------------------------------------|-----|
|             | Control in Subjects With Type 2 Diabetes                                                                                                                                         |           |     |          | Strand J, Zdravkovic M, Le Thi TD, Colagiuri S; LEAD-1 SU study group.                                                                                                                         |                                                                                                       |     |
| NCT00318461 | To Compare the Effect of Liraglutide When Given Together With Metformin With the Effect of Metformin Given Alone and With the Effect of Glimepiride and Metformin Given Together | Completed | Yes | 18931095 | Nauck M, Frid A, Hermansen K, Shah NS, Tankova T, Mitha IH, Zdravkovic M, D'Amico M, Matthews DR; LEAD-2 Study Group.                                                                          | Diabetes Care. 2009 Jan;32(1):84-90. Epub 2008 Oct 17.                                                |     |
| NCT00318968 | Nexium RESPONSE Trial                                                                                                                                                            | Completed | Yes | 21083590 | Meineche-Schmidt V, Christensen E, Bytzer P.                                                                                                                                                   | Aliment Pharmacol Ther. 2011 Jan;33(1):41-9. doi: 10.1111/j.1365-2036.2010.04501.x. Epub 2010 Oct 29. |     |
| NCT00319098 | Study to Evaluate the Safety and Immunogenicity of a Pandemic Influenza Vaccine in Adults Aged 18 Years and Above                                                                | Completed | Yes | 18407382 | Rammke HC, Bayas JM, de Juanes JR, Caso C, Richardus JH, Campins M, Rombo L, Duval X, Romanenko V, Schwarz TF, Fassakhov R, Abad-Santos F, von Sonnenburg F, Dramowski M, Sanger R, Ballou WR. | Vaccine. 2008 May 2;26(19):2378-88. Epub 2008 Mar 27.                                                 |     |
| NCT00319553 | Post-licensure, Modified Double-blind, Multi-center Study Evaluating Safety and Immunogenicity of ADACEL and BOOSTRIX                                                            | Completed | No  |          |                                                                                                                                                                                                |                                                                                                       | Yes |
| NCT00320268 | Safety & Efficacy Study of Quetiapine Fumarate (SEROQUEL) vs. Placebo in Major Depressive Disorder                                                                               | Completed | Yes | 19668121 | Weisler R, Joyce M, McGill L, Lazarus A, Szamosi J, Eriksson H; Moonstone Study Group.                                                                                                         | CNS Spectr. 2009 Jun;14(6):299-313.                                                                   |     |
| NCT00321373 | Study to Evaluate an Influenza Vaccine Candidate                                                                                                                                 | Completed | No  |          |                                                                                                                                                                                                |                                                                                                       | No  |

|             |                                                                                                                        |            |     |          |                                                                                                                                                       |                                                                                                                 |    |
|-------------|------------------------------------------------------------------------------------------------------------------------|------------|-----|----------|-------------------------------------------------------------------------------------------------------------------------------------------------------|-----------------------------------------------------------------------------------------------------------------|----|
| NCT00321490 | Safety & Efficacy Study of Quetiapine Fumarate (SEROQUEL?) vs. Placebo and Active Control in Major Depressive Disorder | Completed  | Yes | 19358790 | Cutler AJ, Montgomery SA, Feifel D, Lazarus A, AstrÅm M, Brecher M.                                                                                   | J Clin Psychiatry. 2009 Apr;70(4):526-39. Epub 2009 Apr 7. Erratum in: J Clin Psychiatry. 2009 Dec;70(12):1729. |    |
| NCT00321984 | Safety and Efficacy of Dexlansoprazole Modified Release Formulation to Treat Gastroesophageal Reflux Disease           | Completed  | Yes | 19392864 | Fass R, Chey WD, Zakko SF, Andivarothai N, Palmer RN, Perez MC, Atkinson SN.                                                                          | Aliment Pharmacol Ther. 2009 Jun 15;29(12):1261-72. Epub 2009 Apr 8.                                            |    |
| NCT00322036 | Global Efficacy Study of MPC-7869 to Treat Patients With Alzheimer's                                                   | Terminated | No  |          |                                                                                                                                                       |                                                                                                                 | No |
| NCT00322166 | The FREEDOM Study: a Randomised Controlled Trial of Sunlight and Calcium in Older People                               | Completed  | Yes | 21369788 | Sambrook PN, Cameron ID, Chen JS, Cumming RG, Durvasula S, Herrmann M, Kok C, Lord SR, Macara M, March LM, Mason RS, Seibel MJ, Wilson N, Simpson JM. | Osteoporos Int. 2012 Feb;23(2):615-24. Epub 2011 Mar 3.                                                         |    |
| NCT00322257 | Safety and Efficacy of Inhaled Insulin in Type 1 Diabetes                                                              | Terminated | No  |          |                                                                                                                                                       |                                                                                                                 | No |
| NCT00322361 | Modified Process Hepatitis B Vaccine in Healthy Neonates                                                               | Completed  | Yes | 22227229 | Minervini G, McC Carson BJ, Reisinger KS, Martin JC, Stek JE, Atkins BM, Nadig KB, Liska V, SchÅdel FP, Bhuyan PK.                                    | Vaccine. 2012 Feb 14;30(8):1476-80. Epub 2012 Jan 5.                                                            |    |
| NCT00322595 | Efficacy and Safety Study of Seroquel SR in the Treatment of Generalized Anxiety Disorder                              | Completed  | Yes | 19691907 | Bandelow B, Chouinard G, Bobes J, Ahokas A, Eggens I, Liu S, Eriksson H.                                                                              | Int J Neuropsychopharmacol. 2010 Apr;13(3):305-20. Epub 2009 Aug 20.                                            |    |
| NCT00325455 | MK0859 Dose-Ranging Study                                                                                              | Completed  | Yes | 19185645 | Bloomfield D, Carlson GL, Sapre A, Tribble D, McKenney JM, Littlejohn TW 3rd, Sisk CM, Mitchel Y, Pasternak RC.                                       | Am Heart J. 2009 Feb;157(2):352-360.e2. Epub 2008 Dec 20.                                                       |    |
| NCT00325676 | Comparison of the Classical Healing Concept With the Complete Remission Concept After                                  | Completed  | No  |          |                                                                                                                                                       |                                                                                                                 | No |

|             |                                                                                                                                                          |                        |     |          |                                                                                                                                          |                                                                                       |     |
|-------------|----------------------------------------------------------------------------------------------------------------------------------------------------------|------------------------|-----|----------|------------------------------------------------------------------------------------------------------------------------------------------|---------------------------------------------------------------------------------------|-----|
|             | Treatment With Pantoprazole in Adult Patients With Erosive GERD (Gastroesophageal Reflux Disease) (BY1023/M3-342)                                        |                        |     |          |                                                                                                                                          |                                                                                       |     |
| NCT00325819 | AVIS - Acetaminophen Before Vaccines for Infants Study                                                                                                   | Active, not recruiting | Yes | 21698100 | Jackson LA, Peterson D, Dunn J, Hambidge SJ, Dunstan M, Starkovich P, Yu O, Benoit J, Dominguez-Islas CP, Carste B, Benson P, Nelson JC. | PLoS One. 2011;6(6):e20102. Epub 2011 Jun 17.                                         |     |
| NCT00325949 | A Study of Pain Relief in Low Back Pain                                                                                                                  | Completed              | No  |          |                                                                                                                                          |                                                                                       | No  |
| NCT00326053 | Prevention of Asthma Relapse After Discharge From Emergency                                                                                              | Completed              | No  |          |                                                                                                                                          |                                                                                       | No  |
| NCT00326183 | Hepatitis A Vaccine, Inactivated and Measles, Mumps, Rubella and Varicella Virus Vaccine Live Safety Study                                               | Completed              | No  |          |                                                                                                                                          |                                                                                       | Yes |
| NCT00326287 | Ceftobiprole in the Treatment of Patients With Community-Acquired Pneumonia                                                                              | Completed              | Yes | 22230331 | Nicholson SC, Welte T, File TM Jr, Strauss RS, Michiels B, Kaul P, Balis D, Arbit D, Amsler K, Noel GJ.                                  | Int J Antimicrob Agents. 2012 Mar;39(3):240-6. Epub 2012 Jan 9.                       |     |
| NCT00327015 | A Phase 3 Study of BMS-477118 in Combination With Metformin in Subjects With Type 2 Diabetes Who Are Not Controlled With Diet and Exercise               | Completed              | Yes | 19515181 | Jadzinsky M, Pfützner A, Paz-Pacheco E, Xu Z, Allen E, Chen R; CV181-039 Investigators.                                                  | Diabetes Obes Metab. 2009 Jun;11(6):611-22.                                           |     |
| NCT00327587 | 8-week Study to Evaluate Safety and Efficacy of Various Combinations of Valsartan, HCTZ, and Amlodipine in Patients With Moderate to Severe Hypertension | Completed              | Yes | 21248785 | Lacourcière Y, Crikelair N, Glazer RD, Yen J, Calhoun DA.                                                                                | J Hum Hypertens. 2011 Oct;25(10):615-22. doi: 10.1038/jhh.2010.115. Epub 2011 Jan 20. |     |

|             |                                                                                                                                                                       |            |     |          |                                                                                                                                                                                     |                                                                                           |    |
|-------------|-----------------------------------------------------------------------------------------------------------------------------------------------------------------------|------------|-----|----------|-------------------------------------------------------------------------------------------------------------------------------------------------------------------------------------|-------------------------------------------------------------------------------------------|----|
| NCT00328627 | Efficacy and Safety of Alogliptin Combined With Pioglitazone in Treating Subjects With Type 2 Diabetes Mellitus.                                                      | Completed  | Yes | 22419732 | DeFronzo RA, Burant CF, Fleck P, Wilson C, Mekki Q, Pratley RE.                                                                                                                     | J Clin Endocrinol Metab. 2012 May;97(5):1615-22. Epub 2012 Mar 14.                        |    |
| NCT00329745 | Year 3 Extension for Efficacy Follow-up in Subjects Vaccinated in Studies Rota-028, 029 or 030 (NCT00197210)                                                          | Completed  | Yes | 22497874 | Phua KB, Lim FS, Lau YL, Nelson EA, Huang LM, Quak SH, Lee BW, van Doorn LJ, Teoh YL, Tang H, Suryakiran PV, Smolenov IV, Bock HL, Han HH.                                          | Vaccine. 2012 Jun 22;30(30):4552-7. doi: 10.1016/j.vaccine.2012.03.030. Epub 2012 Apr 10. |    |
| NCT00329849 | Safety and Immunogenicity of Meningococcal ACWY Conjugate Vaccine in Children 2 to 10 Years of Age                                                                    | Completed  | No  |          |                                                                                                                                                                                     |                                                                                           | No |
| NCT00330460 | A Randomized, Double-Blind Study to Compare the Efficacy of Treatment With Denosumab Versus Alendronate Sodium in Postmenopausal Women With Low Bone Mineral Density. | Completed  | Yes | 18767928 | Brown JP, Prince RL, Deal C, Recker RR, Kiel DP, de Gregorio LH, Hadji P, Hofbauer LC, Alvaro-Gracia JM, Wang H, Austin M, Wagman RB, Newmark R, Libanati C, San Martin J, Bone HG. | J Bone Miner Res. 2009 Jan;24(1):153-61.                                                  |    |
| NCT00330473 | A Concordance Study Comparing Insulin Treatments in Patients With Type 2 Diabetes                                                                                     | Completed  | Yes | 19772448 | Bergental RM, Freemantle N, Leyk M, Cutler GB Jr, Hayes RP, Muchmore DB.                                                                                                            | Diabetes Technol Ther. 2009 Sep;11 Suppl 2:S45-52.                                        |    |
| NCT00330694 | Efficiency of Physiotherapeutic Care in Parkinson's Disease                                                                                                           | Completed  | Yes | 19959398 | Munneke M, Nijkrake MJ, Keus SH, Kwakkel G, Berendse HW, Roos RA, Borm GF, Adang EM, Overeem S, Bloem BR; ParkinsonNet Trial Study Group.                                           | Lancet Neurol. 2010 Jan;9(1):46-54. Epub 2009 Dec 1.                                      |    |
| NCT00330850 | An Efficacy Study of a Single Dose Treatment of PRO-513 for Subjects Suffering a Migraine Attack                                                                      | Completed  | Yes | 20959428 | Lipton RB, Grosberg B, Singer RP, Pearlman SH, Sorrentino JV, Quiring JN, Saper JR.                                                                                                 | Cephalalgia. 2010 Nov;30(11):1336-45. Epub 2010 Apr 7.                                    |    |
| NCT00331604 | Safety and Efficacy of Inhaled Insulin in                                                                                                                             | Terminated | No  |          |                                                                                                                                                                                     |                                                                                           | No |

|             |                                                                                                                    |           |     |          |                                                                                                                                                                             |                                                           |    |
|-------------|--------------------------------------------------------------------------------------------------------------------|-----------|-----|----------|-----------------------------------------------------------------------------------------------------------------------------------------------------------------------------|-----------------------------------------------------------|----|
|             | Type 2 Diabetes                                                                                                    |           |     |          |                                                                                                                                                                             |                                                           |    |
| NCT00331838 | Prevention of Venous Thromboembolism in Patients Undergoing Elective Total Knee Replacement Surgery                | Completed | Yes | 19187076 | Lassen MR, Dahl OE, Mismetti P, Destrée D, Turpie AG.                                                                                                                       | J Thromb Haemost. 2009 Apr;7(4):566-72. Epub 2009 Jan 24. |    |
| NCT00331851 | Effect of Liraglutide on Blood Glucose Control in Subjects With Type 2 Diabetes                                    | Completed | Yes | 19688338 | Russell-Jones D, Vaag A, Schmitz O, Sethi BK, Lalic N, Antic S, Zdravkovic M, Ravn GM, Simonsen R; Liraglutide Effect and Action in Diabetes 5 (LEAD-5) met+SU Study Group. | Diabetologia. 2009 Oct;52(10):2046-55. Epub 2009 Aug 14.  |    |
| NCT00332293 | AL-15469A for the Treatment of Bacterial Conjunctivitis                                                            | Completed | No  |          |                                                                                                                                                                             |                                                           | No |
| NCT00333398 | Immunogenicity, Safety and Tolerability of CSL Limited Inactivated Influenza Vaccine in Adults                     | Completed | Yes | 18602726 | Talbot HK, Keitel W, Cate TR, Treanor J, Campbell J, Brady RC, Graham I, Dekker CL, Ho D, Winokur P, Walter E, Bennet J, Formica N, Hartel G, Skeljo M, Edwards KM.         | Vaccine. 2008 Jul 29;26(32):4057-61. Epub 2008 Jun 2.     |    |
| NCT00333463 | Compliance With Once Daily Glaucoma Medication                                                                     | Completed | Yes | 19815286 | Okeke CO, Quigley HA, Jampel HD, Ying GS, Plyler RJ, Jiang Y, Friedman DS.                                                                                                  | Ophthalmology. 2009 Dec;116(12):2286-93. Epub 2009 Oct 7. |    |
| NCT00333866 | Randomized, Double-Blind, Placebo-Controlled Trial Of Pregabalin In Patients With Fibromyalgia.                    | Completed | Yes | 21965636 | Pauer L, Winkelmann A, Arsenault P, Jespersen A, Whelan L, Atkinson G, Leon T, Zeiher B; A0081100 Investigators.                                                            | J Rheumatol. 2011 Dec;38(12):2643-52. Epub 2011 Oct 1.    |    |
| NCT00333918 | Safety/Efficacy of Bromfenac Ophthalmic Solution for Ocular Inflammation and Pain Associated With Cataract Surgery | Completed | No  |          |                                                                                                                                                                             |                                                           | No |
| NCT00334334 | Safety and Immunogenicity Study of GlaxoSmithKline (GSK) Biologicals' 10-valent Pneumococcal Conjugate Vaccine.    | Completed | Yes | 19325450 | Wysocki J, Tejedor JC, Grunert D, Konior R, Garcia-Sicilia J, Knuf M, Bernard L, Dieussaert I, Schuerman L.                                                                 | Pediatr Infect Dis J. 2009 Apr;28(4 Suppl):S77-88.        |    |

|             |                                                                                                                                   |           |     |          |                                                                                                                                                                                      |                                                                        |    |
|-------------|-----------------------------------------------------------------------------------------------------------------------------------|-----------|-----|----------|--------------------------------------------------------------------------------------------------------------------------------------------------------------------------------------|------------------------------------------------------------------------|----|
| NCT00336388 | Use of Rapid Diagnostic Tests for Malaria Case Management in Kenya                                                                | Completed | Yes | 19478249 | Skarbinski J, Ouma PO, Causer LM, Kariuki SK, Barnwell JW, Alaii JA, de Oliveira AM, Zurovac D, Larson BA, Snow RW, Rowe AK, Laserson KF, Akhwale WS, Slutsker L, Hamel MJ.          | Am J Trop Med Hyg. 2009 Jun;80(6):919-26.                              |    |
| NCT00336544 | Study Comparing the Safety and Efficacy of Cethromycin to Clarithromycin for the Treatment of Community-Acquired Pneumonia        | Completed | Yes | 22290969 | English ML, Fredericks CE, Milanesio NA, Rohowsky N, Xu ZQ, Jenta TR, Flavin MT, Eiznhamer DA.                                                                                       | Antimicrob Agents Chemother. 2012 Apr;56(4):2037-47. Epub 2012 Jan 30. |    |
| NCT00337727 | Aprepitant for the Prevention of Chemotherapy Induced Nausea and Vomiting (CINV)                                                  | Completed | Yes | 19568773 | Rapoport BL, Jordan K, Boice JA, Taylor A, Brown C, Hardwick JS, Carides A, Webb T, Schmoll HJ.                                                                                      | Support Care Cancer. 2010 Apr;18(4):423-31. Epub 2009 Jul 1.           |    |
| NCT00337779 | Clinical Trial Comparing Treatment of Relapsing-Remitting Multiple Sclerosis (RR-MS) With Two Doses of Glatiramer Acetate (GA).   | Completed | Yes | 21280077 | Comi G, Cohen JA, Arnold DL, Wynn D, Filippi M; FORTE Study Group.                                                                                                                   | Ann Neurol. 2011 Jan;69(1):75-82. doi: 10.1002/ana.22316.              |    |
| NCT00338793 | Corticosteroids in the Treatment of Tuberculous Pleurisy                                                                          | Completed | No  |          |                                                                                                                                                                                      |                                                                        | No |
| NCT00344006 | Chlorproguanil-Dapsone-Artesunate Versus COARTEM For Uncomplicated Malaria                                                        | Completed | Yes | 19690618 | Premji Z, Umeh RE, Owusu-Agyei S, Esamai F, Ezedinachi EU, Oguche S, Borrmann S, Sowunmi A, Duparc S, Kirby PL, Pamba A, Kellam L, Guiguemdã R, Greenwood B, Ward SA, Winstanley PA. | PLoS One. 2009 Aug 19;4(8):e6682.                                      |    |
| NCT00344110 | Study Comparing SPP100 (Aliskiren) 150mg to Placebo and to Losartan 50mg in Patients With Mild to Moderate Essential Hypertension | Completed | No  |          |                                                                                                                                                                                      |                                                                        | No |

|             |                                                                                                                   |           |     |          |                                                                                                |                                                                                                              |     |
|-------------|-------------------------------------------------------------------------------------------------------------------|-----------|-----|----------|------------------------------------------------------------------------------------------------|--------------------------------------------------------------------------------------------------------------|-----|
| NCT00344318 | Safety and Immunogenicity Study of GlaxoSmithKline (GSK) Biologicals' 10-valent Pneumococcal Conjugate Vaccine    | Completed | Yes | 19325451 | Bernal N, Szenborn L, Chrobot A, Alberto E, Lommel P, Gatchalian S, Dieussaert I, Schuerman L. | Pediatr Infect Dis J. 2009 Apr;28(4 Suppl):S89-96.                                                           |     |
| NCT00345579 | Safety of Hib-MenCY-TT Vaccine Versus Licensed Hib Conjugate Vaccine, Given at 2, 4, 6 and 12 to 15 Months of Age | Completed | No  |          |                                                                                                |                                                                                                              | Yes |
| NCT00345683 | Safety of Hib-MenCY-TT Vaccine Versus Licensed Hib Conjugate Vaccine, Given at 12 to 15 Months of Age.            | Completed | No  |          |                                                                                                |                                                                                                              | Yes |
| NCT00346073 | Safety and Immunogenicity of GSK's Tdap Vaccine (Boostrix) in Adults Aged 19 to 64 Years                          | Completed | Yes | 19041352 | Blatter M, Friedland LR, Weston WM, Li P, Howe B.                                              | Vaccine. 2009 Jan 29;27(5):765-72. Epub 2008 Nov 27.                                                         |     |
| NCT00347360 | The COREG And Lisinopril Combination Therapy In Hypertensive Subjects (COSMOS) Trial                              | Completed | Yes | 20883227 | Bakris GL, Iyengar M, Lukas MA, Ordronneau P, Weber MA.                                        | J Clin Hypertens (Greenwich). 2010 Sep;12(9):678-86. doi: 10.1111/j.1751-7176.2010.00341.x. Epub 2010 Jul 8. |     |
| NCT00347932 | A Study to Determine if 0.6% ISV-403 is Safe and Effective in the Treatment of Bacterial Conjunctivitis.          | Completed | Yes | 19323612 | Tepedino ME, Heller WH, Usner DW, Brunner LS, Morris TW, Haas W, Paterno MR, Comstock TL.      | Curr Med Res Opin. 2009 May;25(5):1159-69.                                                                   |     |
| NCT00348348 | A Study to Investigate the Safety and Efficacy of BOL-303224 in the Treatment of Bacterial Conjunctivitis         | Completed | Yes | 19643483 | McDonald MB, Protzko EE, Brunner LS, Morris TW, Haas W, Paterno MR, Comstock TL, Usner DW.     | Ophthalmology. 2009 Sep;116(9):1615-1623.e1. Epub 2009 Jul 29.                                               |     |
| NCT00350987 | Procalcitonin Guided Antibiotic Therapy and Hospitalisation in                                                    | Completed | Yes | 20299634 | Müller F, Christ-Crain M, Bregenzer T, Krause M, Zimmerli W, Mueller B, Schuetz                | Chest. 2010 Jul;138(1):121-9. Epub 2010 Mar 18.                                                              |     |

|             |                                                                                                                         |            |     |          |                                                                                                                                  |                                                           |     |
|-------------|-------------------------------------------------------------------------------------------------------------------------|------------|-----|----------|----------------------------------------------------------------------------------------------------------------------------------|-----------------------------------------------------------|-----|
|             | Patients With Lower Respiratory Tract Infections: The "ProHOSP" Study                                                   |            |     |          | P; ProHOSP Study Group.                                                                                                          |                                                           |     |
| NCT00354094 | [S,S]-Reboxetine Long Term Safety Study In Post-Shingles Pain.                                                          | Terminated | No  |          |                                                                                                                                  |                                                           | No  |
| NCT00354315 | D?ëCISION+, a Continuous Professional Development Program to Improve Optimal Drug Prescription : a Feasibility Study    | Completed  | Yes | 21241514 | Leblanc A, LÃ©garÃ© F, Labrecque M, Godin G, Thivierge R, Laurier C, CÃ´tÃ© L, O'Connor AM, Rousseau M.                          | Implement Sci. 2011 Jan 18;6:5.                           |     |
| NCT00355654 | Study to Compare Booster Vaccination With Pediacel?« to Infanrix?« Hexa When Both Are Co-Administered With Prevenar?«   | Completed  | Yes | 22691430 | Berner R, Boisnard F, Thomas S, Mwawasi G, Reynolds D.                                                                           | Vaccine. 2012 Jul 27;30(35):5270-7. Epub 2012 Jun 9.      |     |
| NCT00355849 | Evaluate the Efficacy and Safety of Insulin in Patients With Type 2 Diabetes                                            | Completed  | Yes | 19772451 | Rosenstock J, Eliaschewitz FG, Heilmann CR, Muchmore DB, Hayes RP, Belin RM.                                                     | Diabetes Technol Ther. 2009 Sep;11 Suppl 2:S63-73.        |     |
| NCT00356382 | Decreasing Rates of Illness in Kids (DRINK)                                                                             | Completed  | Yes | 20485304 | Merenstein D, Murphy M, Fokar A, Hernandez RK, Park H, Nsouli H, Sanders ME, Davis BA, Niborski V, Tondu F, Shara NM.            | Eur J Clin Nutr. 2010 Jul;64(7):669-77. Epub 2010 May 19. |     |
| NCT00356915 | Itraconazole Tablets Vs. Itraconazole Capsules vs. Placebo in Onychomycosis of the Toenail.                             | Completed  | No  |          |                                                                                                                                  |                                                           | Yes |
| NCT00358436 | Efficacy and Safety of LAS 34273 in Patients With Moderate to Severe Stable Chronic Obstructive Pulmonary Disease(COPD) | Completed  | Yes | 21518460 | Jones PW, Rennard SI, Agusti A, Chanez P, Magnussen H, Fabbri L, Donohue JF, Bateman ED, Gross NJ, Lamarca R, Caracta C, Gil EG. | Respir Res. 2011 Apr 26;12:55.                            |     |



|             |                                                                                                                                                                                                                                                                 |            |     |          |                                                                                                                                                                                                                                                                                 |                                                                                                                                   |  |
|-------------|-----------------------------------------------------------------------------------------------------------------------------------------------------------------------------------------------------------------------------------------------------------------|------------|-----|----------|---------------------------------------------------------------------------------------------------------------------------------------------------------------------------------------------------------------------------------------------------------------------------------|-----------------------------------------------------------------------------------------------------------------------------------|--|
| NCT00358917 | Study of Lopinavir/Ritonavir Tablets Comparing Once-Daily Versus Twice-Daily Administration When Coadministered With Nucleoside/Nucleotide Reverse Transcriptase Inhibitors in Antiretroviral-Experienced Human Immunodeficiency Virus Type 1 Infected Subjects | Completed  | Yes | 20134330 | Zajdenverg R, Podsadecki TJ, Badal-Faesens S, Andrade-Villanueva J, Gathe J, Mingrone H, Fredrick LM, Gaultier IA, Woodward WC, Bernstein BM.                                                                                                                                   | J Acquir Immune Defic Syndr. 2010 Jun;54(2):143-51.                                                                               |  |
| NCT00359554 | Influenza Vaccination of Nursing Home Workers.                                                                                                                                                                                                                  | Terminated | Yes | 19682118 | Lemaitre M, Meret T, Rothan-Tondeur M, Belmin J, Lejonc JL, Luquel L, Piette F, Salom M, Verny M, Vetel JM, Veyssier P, Carrat F.                                                                                                                                               | J Am Geriatr Soc. 2009 Sep;57(9):1580-6. Epub 2009 Aug 4.                                                                         |  |
| NCT00360230 | Partially-blind (Observer-blind) Study of Safety and Immunogenicity of Two Malaria Vaccines in Ghanaian Children                                                                                                                                                | Completed  | Yes | 19806184 | Owusu-Agyei S, Ansong D, Asante K, Kwarteng Owusu S, Owusu R, Wireko Brobbay NA, Dosoo D, Osei Akoto A, Osei-Kwakye K, Adjei EA, Boahen KO, Sylverken J, Adjei G, Sambian D, Apanga S, Kayan K, Vekemans J, Ofori-Anyinam O, Leach A, Lievens M, Demoitie MA, Dubois MC, et al. | PLoS One. 2009 Oct 2;4(10):e7302. Erratum in: PLoS One. 2010;5(11). doi: 10.1371/annotation/23dc5ebf-15ce-4f77-9aaf-9afec78e19b5. |  |
| NCT00360308 | Efficacy, Safety and Tolerability of E2007 in Levodopa Treated Parkinson's Disease Patients With Motor Fluctuations                                                                                                                                             | Terminated | Yes | 22222634 | Rascol O, Barone P, Behari M, Emre M, Giladi N, Olanow CW, Ruzicka E, Bibbiani F, Squillacote D, Patten A, Tolosa E.                                                                                                                                                            | Clin Neuropharmacol. 2012 Jan-Feb;35(1):15-20.                                                                                    |  |
| NCT00361504 | A Study to Evaluate Long-Term Safety of Multiple Doses of Tapentadol (CG5503) Prolonged-Release (PR) and Oxycodone Controlled-Release (CR) in Patients With                                                                                                     | Completed  | Yes | 20602712 | Wild JE, Grond S, Kuperwasser B, Gilbert J, McCann B, Lange B, Steup A, Häufel T, Etropolski MS, Rauschkolb C, Lange R.                                                                                                                                                         | Pain Pract. 2010 Sep-Oct;10(5):416-27. doi: 10.1111/j.1533-2500.2010.00397.x.                                                     |  |

|             |                                                                                                                                          |           |     |          |                                                                                                                                                                                                              |                                                            |     |
|-------------|------------------------------------------------------------------------------------------------------------------------------------------|-----------|-----|----------|--------------------------------------------------------------------------------------------------------------------------------------------------------------------------------------------------------------|------------------------------------------------------------|-----|
|             | Chronic Pain                                                                                                                             |           |     |          |                                                                                                                                                                                                              |                                                            |     |
| NCT00361569 | A Clinical Trial to Evaluate the Safety and Efficacy of DR-2041(Synthetic Conjugated Estrogens, A) for Treatment of Vulvovaginal Atrophy | Completed | No  |          |                                                                                                                                                                                                              |                                                            | Yes |
| NCT00361582 | A Study to Evaluate the Effectiveness and Safety of Multiple Doses of Tapentadol(CG5503) in Patients Awaiting Joint Replacement Surgery  | Completed | Yes | 19302899 | Hartrick C, Van Hove I, Stegmann JU, Oh C, Upmalis D.                                                                                                                                                        | Clin Ther. 2009 Feb;31(2):260-71.                          |     |
| NCT00362934 | Comparison of the Combination of Fenofibrate and Simvastatin Versus Atorvastatin                                                         | Completed | No  |          |                                                                                                                                                                                                              |                                                            | No  |
| NCT00363415 | Study of Pemetrexed and Carboplatin Compared With Etoposide Carboplatin to Treat Extensive-Stage Small Cell Lung Cancer                  | Completed | Yes | 19720897 | Socinski MA, Smit EF, Lorigan P, Konduri K, Reck M, Szczesna A, Blakely J, Serwatowski P, Karaseva NA, Ciuleanu T, Jassem J, Dediu M, Hong S, Visseren-Grul C, Hanauske AR, Obasaju CK, Guba SC, Thatcher N. | J Clin Oncol. 2009 Oct 1;27(28):4787-92. Epub 2009 Aug 31. |     |
| NCT00363545 | To Assess Immunogenicity, Reactogenicity & Safety of 2 Formulations of GSK's HRV Vaccine as 2-dose Vaccination (Infants)                 | Completed | No  |          |                                                                                                                                                                                                              |                                                            | No  |
| NCT00363870 | A Study to Demonstrate the Efficacy of GSK Biologicals' Influenza Vaccine in Adults                                                      | Completed | Yes | 19909082 | Beran J, Vesikari T, Wertzova V, Karvonen A, Honegr K, Lindblad N, Van Belle P, Peeters M, Innis BL, Devaster JM.                                                                                            | J Infect Dis. 2009 Dec 15;200(12):1861-9.                  |     |

|             |                                                                                                      |                        |     |          |                                                                                                                                                                                                                                                                                  |                                                           |     |
|-------------|------------------------------------------------------------------------------------------------------|------------------------|-----|----------|----------------------------------------------------------------------------------------------------------------------------------------------------------------------------------------------------------------------------------------------------------------------------------|-----------------------------------------------------------|-----|
| NCT00363896 | A Trial Assessing LAS34273 in Moderate to Severe Stable Chronic Obstructive Pulmonary Disease (COPD) | Completed              | Yes | 21518460 | Jones PW, Rennard SI, Agusti A, Chanez P, Magnussen H, Fabbri L, Donohue JF, Bateman ED, Gross NJ, Lamarca R, Caracta C, Gil EG.                                                                                                                                                 | Respir Res. 2011 Apr 26;12:55.                            |     |
| NCT00364741 | Supplemental Oxygen and Complications After Abdominal Surgery (The PROXI-trial)                      | Completed              | Yes | 19826023 | Meyhoff CS, Wetterslev J, Jorgensen LN, Henneberg SW, HÅgdall C, Lundvall L, Svendsen PE, Mollerup H, Lunn TH, Simonsen I, Martinsen KR, Pulawska T, Bundgaard L, Bugge L, Hansen EG, Riber C, Gocht-Jensen P, Walker LR, Bendtsen A, Johansson G, Skovgaard N, HeltÅ, K, et al. | JAMA. 2009 Oct 14;302(14):1543-50.                        |     |
| NCT00365430 | SAFE or SORRY? Patient Safety Study of the Prevention of Adverse Patient Outcomes                    | Completed              | Yes | 20202633 | van Gaal BG, Schoonhoven L, Vloet LC, Mintjes JA, Borm GF, Koopmans RT, van Achterberg T.                                                                                                                                                                                        | Int J Nurs Stud. 2010 Sep;47(9):1117-25. Epub 2010 Mar 3. |     |
| NCT00365885 | Showing Health Information Value in a Community Network                                              | Active, not recruiting | Yes | 21335691 | Eisenstein EL, Kawamoto K, Anstrom KJ, Willis JM, Silvey GM, Johnson FS, Edwards R, Mise J, Yaggy SD, Lobach DF.                                                                                                                                                                 | Stud Health Technol Inform. 2011;164:77-81.               |     |
| NCT00366340 | Study To Evaluate a 13-valent Pneumococcal Conjugate Vaccine in Infants.                             | Completed              | Yes | 21704105 | Gimenez-Sanchez F, Kieninger DM, Kueper K, Martinon-Torres F, Bernaola E, Diez-Domingo J, Steul K, Juergens C, Gurtman A, Giardina P, Liang JZ, Gruber WC, Emini EA, Scott DA; 501 and 006 study groups.                                                                         | Vaccine. 2011 Aug 11;29(35):6042-8. Epub 2011 Jun 23.     |     |
| NCT00366548 | Study to Evaluate a 13-valent Pneumococcal Conjugate Vaccine in Infants                              | Completed              | No  |          |                                                                                                                                                                                                                                                                                  |                                                           | Yes |
| NCT00366678 | Study To Evaluate a 13-valent Pneumococcal Conjugate Vaccine in Infants                              | Completed              | No  |          |                                                                                                                                                                                                                                                                                  |                                                           | Yes |
| NCT00366899 | Study Evaluating a 13-                                                                               | Completed              | Yes | 20427630 | Esposito S, Tansey S, Thompson                                                                                                                                                                                                                                                   | Clin Vaccine Immunol.                                     |     |

|             |                                                                                                                                      |           |     |          |                                                                                                                                                                                                          |                                                                            |  |
|-------------|--------------------------------------------------------------------------------------------------------------------------------------|-----------|-----|----------|----------------------------------------------------------------------------------------------------------------------------------------------------------------------------------------------------------|----------------------------------------------------------------------------|--|
|             | valent Pneumococcal Conjugate Vaccine in Infants                                                                                     |           |     |          | A, Razmpour A, Liang J, Jones TR, Ferrera G, Maida A, Bona G, Sabatini C, Pagni L, Emini EA, Gruber WC, Scott DA, Principi N.                                                                            | 2010 Jun;17(6):1017-26. Epub 2010 Apr 28.                                  |  |
| NCT00368108 | Efficacy, Safety, and Tolerability of E2007 in Levodopa Treated Parkinson's Disease Patients With Motor Fluctuations                 | Completed | Yes | 22161845 | Lees A, Fahn S, Eggert KM, Jankovic J, Lang A, Micheli F, Mouradian MM, Oertel WH, Olanow CW, Poewe W, Rascol O, Tolosa E, Squillacote D, Kumar D.                                                       | Mov Disord. 2012 Feb;27(2):284-8. doi: 10.1002/mds.23983. Epub 2011 Dec 9. |  |
| NCT00368277 | A Safety and Efficacy Trial of Aliskiren 150mg , 300 mg Compared to Ramipril 5mg, 10mg in the Elderly                                | Completed | Yes | 20033075 | Duprez DA, Munger MA, Botha J, Keefe DL, Charney AN.                                                                                                                                                     | J Hum Hypertens. 2010 Sep;24(9):600-8. Epub 2009 Dec 24.                   |  |
| NCT00368537 | Study Comparing the Safety and Efficacy of Tigecycline With Ampicillin-Sulbactam or Amoxicillin-Clavulanate to Treat Skin Infections | Completed | Yes | 23145952 | Matthews P, Alpert M, Rahav G, Rill D, Zito E, Gardiner D, Pedersen R, Babinchak T, McGovern P.                                                                                                          | BMC Infect Dis. 2012 Nov 12;12(1):297. [Epub ahead of print]               |  |
| NCT00368966 | Study To Evaluate a 13-valent Pneumococcal Conjugate Vaccine in Infants.                                                             | Completed | Yes | 21704105 | Gimenez-Sanchez F, Kieninger DM, Kueper K, Martinon-Torres F, Bernaola E, Diez-Domingo J, Steul K, Juergens C, Gurtman A, Giardina P, Liang JZ, Gruber WC, Emini EA, Scott DA; 501 and 006 study groups. | Vaccine. 2011 Aug 11;29(35):6042-8. Epub 2011 Jun 23.                      |  |
| NCT00369824 | Evaluation of Safety and Immunogenicity of Co-administering HPV Vaccine With Other Vaccines in Healthy Female Subjects               | Completed | Yes | 21817954 | Wheeler CM, Harvey BM, Pichichero ME, Simon MW, Combs SP, Blatter MM, Marshall GS, Catteau G, Dobbelaere K, Descamps D, Dubin G, Schuind A.                                                              | Pediatr Infect Dis J. 2011 Dec;30(12):e225-34.                             |  |
| NCT00370396 | Safety and Immunogenicity Study of a Booster Dose of GSK Biologicals' 10-valent Pneumococcal Conjugate Vaccine.                      | Completed | Yes | 19325449 | Vesikari T, Wysocki J, Chevallier B, Karvonen A, Czajka H, Ars ne JP, Lommel P, Dieussaert I, Schuerman L.                                                                                               | Pediatr Infect Dis J. 2009 Apr;28(4 Suppl):S66-76.                         |  |

|             |                                                                                                                   |           |     |          |                                                                                                                                      |                                                                                              |    |
|-------------|-------------------------------------------------------------------------------------------------------------------|-----------|-----|----------|--------------------------------------------------------------------------------------------------------------------------------------|----------------------------------------------------------------------------------------------|----|
| NCT00371137 | A Safety and Efficacy Study of Xyrem?« in Subjects With Fibromyalgia                                              | Completed | Yes | 21397402 | Russell IJ, Holman AJ, Swick TJ, Alvarez-Horine S, Wang YG, Guinta D; Sodium Oxybate 06-008 FM Study Group.                          | Pain. 2011 May;152(5):1007-17. Epub 2011 Mar 11.                                             |    |
| NCT00371683 | Study of Apixaban for the Prevention of Thrombosis-related Events Following Knee Replacement Surgery              | Completed | Yes | 19657123 | Lassen MR, Raskob GE, Gallus A, Pineo G, Chen D, Portman RJ.                                                                         | N Engl J Med. 2009 Aug 6;361(6):594-604. Erratum in: N Engl J Med. 2009 Oct 29;361(18):1814. |    |
| NCT00373958 | Study Comparing 13 Valente Pneumococcal Conjugate Vaccine With 7 Valent Pneumococcal Conjugate Vaccine            | Completed | Yes | 20732948 | Yeh SH, Gurtman A, Hurley DC, Block SL, Schwartz RH, Patterson S, Jansen KU, Love J, Gruber WC, Emini EA, Scott DA; 004 Study Group. | Pediatrics. 2010 Sep;126(3):e493-505. Epub 2010 Aug 23.                                      |    |
| NCT00375037 | A Multifaceted Intervention to Improve Hand Hygiene                                                               | Completed | Yes | 20923288 | Mertz D, Dafoe N, Walter SD, Brazil K, Loeb M.                                                                                       | Infect Control Hosp Epidemiol. 2010 Nov;31(11):1170-6.                                       |    |
| NCT00376584 | Effect of an Investigational Compound on Tolerability of Extended Release Niacin                                  | Completed | No  |          |                                                                                                                                      |                                                                                              | No |
| NCT00377585 | Demonstrate the Superiority of the Immune Response of Adjuvanted Influenza Vaccine Induced in an Adult Population | Completed | No  |          |                                                                                                                                      |                                                                                              | No |
| NCT00377819 | Study of Transitioning From Alendronate to Denosumab                                                              | Completed | Yes | 19594293 | Kendler DL, Roux C, Benhamou CL, Brown JP, Lillestol M, Siddhanti S, Man HS, San Martin J, Bone HG.                                  | J Bone Miner Res. 2010 Jan;25(1):72-81.                                                      |    |
| NCT00379236 | A Study of the Efficacy and Safety of EUFLEXXA?« for Treatment of Painful Osteoarthritis of the Knee              | Completed | Yes | 21820521 | Altman RD, Rosen JE, Bloch DA, Hatoum HT.                                                                                            | Osteoarthritis Cartilage. 2011 Oct;19(10):1169-75. Epub 2011 Jul 23.                         |    |

|             |                                                                                                                                                                   |           |     |          |                                                                                                                                                                                                                                                   |                                                                   |     |
|-------------|-------------------------------------------------------------------------------------------------------------------------------------------------------------------|-----------|-----|----------|---------------------------------------------------------------------------------------------------------------------------------------------------------------------------------------------------------------------------------------------------|-------------------------------------------------------------------|-----|
| NCT00380211 | Safety and Immunogenicity of FluLaval? and Fluarix? (Influenza Vaccines) in Young and Older Adults                                                                | Completed | No  |          |                                                                                                                                                                                                                                                   |                                                                   | No  |
| NCT00380393 | Efficacy of RTS,S/AS01 Vaccine Against Episodes of Malaria Due to P. Falciparum Infection in Children.                                                            | Completed | Yes | 19064627 | Bejon P, Lusingu J, Olotu A, Leach A, Lievens M, Vekemans J, Mshamu S, Lang T, Gould J, Dubois MC, Demoiti MA, Stallaert JF, Vansadia P, Carter T, Njuguna P, Awuondo KO, Malabeja A, Abdul O, Gesase S, Mturi N, Drakeley CJ, Savarese B, et al. | N Engl J Med. 2008 Dec 11;359(24):2521-32. Epub 2008 Dec 8.       |     |
| NCT00382096 | Efficacy of Fixed Combination Therapy of Vildagliptin and Metformin Compared to the Individual Monotherapy Components in Drug Naive Patients With Type 2 Diabetes | Completed | Yes | 19320662 | Bosi E, Dotta F, Jia Y, Goodman M.                                                                                                                                                                                                                | Diabetes Obes Metab. 2009 May;11(5):506-15. Epub 2009 Mar 23.     |     |
| NCT00382408 | A Clinical Trial to Evaluate the Safety, Efficacy, and Immunogenicity of DR-5001                                                                                  | Completed | No  |          |                                                                                                                                                                                                                                                   |                                                                   | Yes |
| NCT00382772 | A Study in Infants to Test Two Preparations (Freeze-dried or Liquid) of the Rotavirus Vaccine (HRV Vaccine).                                                      | Completed | Yes | 21238572 | Vesikari T, Karvonen A, Bouckenoghe A, Suryakiran PV, Smolenov I, Han HH.                                                                                                                                                                         | Vaccine. 2011 Mar 3;29(11):2079-84. Epub 2011 Jan 14.             |     |
| NCT00383123 | Study Comparing the Immune Response and Safety of Fluorix and Fluzone Influenza Vaccines in Children                                                              | Completed | Yes | 20431425 | Baxter R, Jeanfreau R, Block SL, Blatter M, Pichichero M, Jain VK, Dew W, Innis BL.                                                                                                                                                               | Pediatr Infect Dis J. 2010 Oct;29(10):924-30.                     |     |
| NCT00383240 | Effects of Mometasone Furoate/Formoterol Combination Versus                                                                                                       | Completed | Yes | 20678306 | Nathan RA, Nolte H, Pearlman DS; P04334 Study Investigators.                                                                                                                                                                                      | Allergy Asthma Proc. 2010 Jul-Aug;31(4):269-79. Epub 2010 Jul 30. |     |

|             |                                                                                                                                            |            |     |          |                                                                                                                                       |                                                                                     |  |
|-------------|--------------------------------------------------------------------------------------------------------------------------------------------|------------|-----|----------|---------------------------------------------------------------------------------------------------------------------------------------|-------------------------------------------------------------------------------------|--|
|             | Mometasone Furoate Alone in Persistent Asthmatics (Study P04334AM1)(COMPLETED)                                                             |            |     |          |                                                                                                                                       |                                                                                     |  |
| NCT00383539 | Lot-to-Lot Consistency Study of the Investigational, Inactivated, Split-Virion Influenza Vaccine in Adults                                 | Completed  | Yes | 20372053 | Arnou R, Eavis P, Pardo JR, Ambrozaitis A, Kazek MP, Weber F.                                                                         | Hum Vaccin. 2010 Apr;6(4):346-54. Epub 2010 Apr 15.                                 |  |
| NCT00383552 | Effects of Mometasone Furoate/Formoterol Combination Versus Mometasone Furoate Alone in Persistent Asthmatics (Study P04073AM1)(COMPLETED) | Completed  | Yes | 21828036 | Meltzer EO, Kuna P, Nolte H, Nayak AS, Laforce C; P04073 Study Investigators.                                                         | Eur Respir J. 2012 Feb;39(2):279-89. Epub 2011 Aug 4.                               |  |
| NCT00384189 | A Comparative Study of Inhaled Ciclesonide Versus Placebo in Children With Asthma (6-11 y) (BY9010/M1-209)                                 | Completed  | Yes | 20619624 | Pedersen S, Potter P, Dachev S, Bosheva M, Kaczmarek J, Springer E, Dunkel J, Engelstatter R.                                         | Respir Med. 2010 Nov;104(11):1618-28. Epub 2010 Jul 8.                              |  |
| NCT00384436 | Fixed Dose Comparison of Escitalopram to an Active Comparator in Severely Depressed Patients                                               | Completed  | Yes | 22559255 | Bose A, Tsai J, Li D.                                                                                                                 | Clin Drug Investig. 2012 Jun 1;32(6):373-85. doi: 10.2165/11631890-000000000-00000. |  |
| NCT00384475 | A Study of Ciclesonide Nasal Spray in Patients 18 Years and Older With Seasonal Allergic Rhinitis (BY9010/M1-413)                          | Completed  | Yes | 19205288 | Couroux P, Kunjibettu S, Hall N, Wingertzahn MA.                                                                                      | Ann Allergy Asthma Immunol. 2009 Jan;102(1):62-8.                                   |  |
| NCT00384605 | An Investigational Drug Study to Assess Weight Loss in Obese and Overweight Patients                                                       | Terminated | Yes | 20212496 | Proietto J, Rissanen A, Harp JB, Erondy N, Yu Q, Suryawanshi S, Jones ME, Johnson-Levonas AO, Heymsfield SB, Kaufman KD, Amatruda JM. | Int J Obes (Lond). 2010 Aug;34(8):1243-54. Epub 2010 Mar 9.                         |  |

|             |                                                                                                                                               |                        |     |          |                                                                                                                  |                                                      |     |
|-------------|-----------------------------------------------------------------------------------------------------------------------------------------------|------------------------|-----|----------|------------------------------------------------------------------------------------------------------------------|------------------------------------------------------|-----|
| NCT00385255 | Immunogenicity, Safety of GSKs Tdap Vaccine Boostrix When Coadministered With GSKs Influenza Vaccine Fluarix in Adults                        | Completed              | Yes | 19838080 | Weston WM, Chandrashekar V, Friedland LR, Howe B.                                                                | Hum Vaccin. 2009 Dec;5(12):858-66. Epub 2009 Dec 31. |     |
| NCT00385840 | Study to Evaluate the Immunogenicity and Safety of a Second Vaccination With the Adjuvanted Influenza Vaccine Candidate                       | Completed              | No  |          |                                                                                                                  |                                                      | No  |
| NCT00386867 | A Randomized Trial of Buccal Compared to Oral Misoprostol Following Mifepristone for Medical Abortion up to 63 Days LMP                       | Completed              | Yes | 19037040 | Winikoff B, Dzuba IG, Creinin MD, Crowden WA, Goldberg AB, Gonzales J, Howe M, Moskowitz J, Prine L, Shannon CS. | Obstet Gynecol. 2008 Dec;112(6):1303-10.             |     |
| NCT00387517 | Safety/Efficacy of Combo Therapy With Aliskiren & Hydrochlorothiazide vs Therapy With Hydrochlorothiazide Alone in Patients With Hypertension | Completed              | Yes | 19245300 | Blumenstein M, Romaszko J, Calder <sup>3</sup> n A, Andersen K, Ibram G, Liu Z, Zhang J.                         | Curr Med Res Opin. 2009 Apr;25(4):903-10.            |     |
| NCT00390221 | Safety and Efficacy Study of Daclizumab HYP to Treat Relapsing-Remitting Multiple Sclerosis                                                   | Active, not recruiting | No  |          |                                                                                                                  |                                                      | No  |
| NCT00391053 | Immunogenicity of High-dose Inactivated, Split-virion Influenza Vaccine Versus Standard Fluzone Vaccine in the Elderly                        | Completed              | Yes | 19508159 | Falsey AR, Treanor JJ, Tornieporth N, Capellan J, Gorse GJ.                                                      | J Infect Dis. 2009 Jul 15;200(2):172-80.             |     |
| NCT00391391 | Study of Inactivated, Split-Virion Influenza Vaccine Compared With Standard Fluzone Vaccine in Infants and                                    | Completed              | No  |          |                                                                                                                  |                                                      | Yes |



|             |                                                                                                                                                             |            |     |          |                                                                                                                                                                                                              |                                                          |    |
|-------------|-------------------------------------------------------------------------------------------------------------------------------------------------------------|------------|-----|----------|--------------------------------------------------------------------------------------------------------------------------------------------------------------------------------------------------------------|----------------------------------------------------------|----|
|             | Children                                                                                                                                                    |            |     |          |                                                                                                                                                                                                              |                                                          |    |
| NCT00393458 | Efficacy, Safety, and Tolerability of Once Daily Indacaterol in Chronic Obstructive Pulmonary Disease (COPD) Using Formoterol Twice Daily as Active Control | Completed  | Yes | 20522841 | Dahl R, Chung KF, Buhl R, Magnussen H, Nonikov V, Jack D, Bleasdale P, Owen R, Higgins M, Kramer B; INVOLVE (INDacaterol: Value in COPD: Longer Term Validation of Efficacy and Safety) Study Investigators. | Thorax. 2010 Jun;65(6):473-9.                            |    |
| NCT00393653 | Prescription Methods Assessment Project (PMAP)                                                                                                              | Terminated | No  |          |                                                                                                                                                                                                              |                                                          | No |
| NCT00395174 | Comparison of the Immunogenicity, Safety and Reactogenicity of FluBlok, To a Licensed Vaccine In Elderly Adults                                             | Completed  | Yes | 19879222 | Keitel WA, Treanor JJ, El Sahly HM, Gilbert A, Meyer AL, Patriarca PA, Cox MM.                                                                                                                               | Vaccine. 2009 Dec 11;28(2):379-85. Epub 2009 Oct 29.     |    |
| NCT00395343 | Sitagliptin Added-on to Insulin Study                                                                                                                       | Completed  | Yes | 20092585 | Vilsb  ll T, Rosenstock J, Yki-J  rvinen H, Cefalu WT, Chen Y, Luo E, Musser B, Andryuk PJ, Ling Y, Kaufman KD, Amatruda JM, Engel SS, Katz L.                                                               | Diabetes Obes Metab. 2010 Feb;12(2):167-77.              |    |
| NCT00395512 | Efficacy of Alogliptin With Pioglitazone (Actos?) in Subjects With Type 2 Diabetes Mellitus                                                                 | Completed  | Yes | 20724648 | Rosenstock J, Inzucchi SE, Seufert J, Fleck PR, Wilson CA, Mekki Q.                                                                                                                                          | Diabetes Care. 2010 Nov;33(11):2406-8. Epub 2010 Aug 19. |    |
| NCT00395603 | Vytorin Treating Uncontrolled Lipids (VyTUL) Study                                                                                                          | Terminated | No  |          |                                                                                                                                                                                                              |                                                          | No |
| NCT00396955 | A Study Comparing 4 Dose Regimens of PLA-695, Naproxen, and Placebo In Subjects With Osteoarthritis Of The Knee                                             | Terminated | No  |          |                                                                                                                                                                                                              |                                                          | No |

|             |                                                                                                                                                                           |           |     |          |                                                                                                                                                         |                                                                                 |    |
|-------------|---------------------------------------------------------------------------------------------------------------------------------------------------------------------------|-----------|-----|----------|---------------------------------------------------------------------------------------------------------------------------------------------------------|---------------------------------------------------------------------------------|----|
| NCT00397631 | Initial Combination With Pioglitazone Study                                                                                                                               | Completed | Yes | 21235696 | Yoon KH, Shockey GR, Teng R, Golm GT, Thakkar PR, Meehan AG, Williams-Herman DE, Kaufman KD, Amatruda JM, Steinberg H.                                  | Int J Clin Pract. 2011 Feb;65(2):154-64. doi: 10.1111/j.1742-1241.2010.02589.x. |    |
| NCT00398645 | A Randomized Study To Evaluate The Efficacy And Safety Of An Investigational Drug In Adolescent And Adult Subjects With Persistent Asthma.                                | Completed | Yes | 21977941 | Woodcock A, Bateman ED, Busse WW, L tvall J, Snowise NG, Forth R, Jacques L, Haumann B, Bleecker ER.                                                    | Respir Res. 2011 Oct 6;12:132.                                                  |    |
| NCT00398944 | Impact of a Computerized Guidelines on the Management of Hypertension and Diabetes                                                                                        | Completed | Yes | N/a      | Falcoff, H., Benainous, O., Gillaizeau, F., Favre, M., Simon, C., Desfontaines, E., Lamy, J.B., Venot, A., Seroussi, B., Bouaud, J., Durieux, P         | Pratiques et organisation des soins. 2009; 40(3): 177-189.                      |    |
| NCT00399464 | Efficacy and Safety of SL77.0499-10 (Alfuzosin) Versus Placebo and Tamsulosin in Japanese Patients With Benign Prostatic Hyperplasia                                      | Completed | No  |          |                                                                                                                                                         |                                                                                 | No |
| NCT00399711 | Effect of Repaglinide and Metformin Combination Tablet or Rosiglitazone and Metformin in Fixed Dose Combination on Blood Glucose Control in Patients With Type 2 Diabetes | Completed | Yes | 19476470 | Raskin P, Lewin A, Reinhardt R, Lyness W; Repaglinide/Metformin Fixed-Dose Combination Study Group.                                                     | Diabetes Obes Metab. 2009 Sep;11(9):865-73. Epub 2009 May 19.                   |    |
| NCT00400153 | Respimat?« Combivent Trial in Chronic Obstructive Pulmonary Disease (COPD)                                                                                                | Completed | Yes | 20172704 | Zuwallack R, De Salvo MC, Kaelin T, Bateman ED, Park CS, Abrahams R, Fakih F, Sachs P, Pudi K, Zhao Y, Wood CC; Combivent Respimat Inhaler Study Group. | Respir Med. 2010 Aug;104(8):1179-88. Epub 2010 Feb 20.                          |    |

|             |                                                                                                                                                            |           |     |          |                                                                                                                                                                                                         |                                                                     |     |
|-------------|------------------------------------------------------------------------------------------------------------------------------------------------------------|-----------|-----|----------|---------------------------------------------------------------------------------------------------------------------------------------------------------------------------------------------------------|---------------------------------------------------------------------|-----|
| NCT00401245 | The Effect Of Dose Titration And Dose Tapering On The Tolerability Of DVS SR In Women With Vasomotor Symptoms                                              | Completed | Yes | 22032759 | Gallagher JC, Strzinek RA, Cheng RF, Ausmanas MK, Astl D, Seljan P.                                                                                                                                     | J Womens Health (Larchmt). 2012 Feb;21(2):188-98. Epub 2011 Oct 27. |     |
| NCT00402506 | A Safety and Efficacy Study to Confirm the Cardioprotective Effects of MC-1 in Patients Undergoing High-Risk CABG                                          | Completed | Yes | 18381567 | MEND-CABG II Investigators, Alexander JH, Emery RW Jr, Carrier M, Ellis SJ, Mehta RH, Hasselblad V, Menasche P, Khalil A, Cote R, Bennett-Guerrero E, Mack MJ, Schuler G, Harrington RA, Tardif JC.     | JAMA. 2008 Apr 16;299(15):1777-87. Epub 2008 Apr 1.                 |     |
| NCT00402597 | Rivaroxaban in Combination With Aspirin Alone or With Aspirin and a Thienopyridine in Patients With Acute Coronary Syndromes (The ATLAS ACS TIMI 46 Trial) | Completed | Yes | 19539361 | Mega JL, Braunwald E, Mohanavelu S, Burton P, Poulter R, Misselwitz F, Hricak V, Barnathan ES, Bordes P, Witkowski A, Markov V, Oppenheimer L, Gibson CM; ATLAS ACS-TIMI 46 study group.                | Lancet. 2009 Jul 4;374(9683):29-38. Epub 2009 Jun 17.               |     |
| NCT00403260 | Pyronaridine Artesunate (3:1) Versus Mefloquine Artesunate in P Falciparum Malaria Patients                                                                | Completed | Yes | 22475593 | Rueangweerayut R, Phyo AP, Uthaisin C, Poravuth Y, Binh TQ, Tinto H, PAnali LK, Valecha N, Tien NT, Abdulla S, Borghini-Fuhrer I, Duparc S, Shin CS, Fleckenstein L; PyronaridineArtesunate Study Team. | N Engl J Med. 2012 Apr 5;366(14):1298-309.                          |     |
| NCT00404547 | Asthma Care With Alvesco?« (Ciclesonide) in Primary Care in Adults - The ACCEPT-study (BY9010/CA-102)                                                      | Completed | No  |          |                                                                                                                                                                                                         |                                                                     | Yes |
| NCT00404651 | Lot Consistency Study of DTaP-IPV-HB-PRP~T Vaccine Administered at 2-4-6 Months of Age in Healthy Infants                                                  | Completed | No  |          |                                                                                                                                                                                                         |                                                                     | No  |
| NCT00405418 | Lantus Versus                                                                                                                                              | Completed | Yes | 20200301 | Swinnen SG, Dain MP, Aronson                                                                                                                                                                            | Diabetes Care. 2010                                                 |     |

|             |                                                                                                               |           |     |          |                                                                                                             |                                                             |    |
|-------------|---------------------------------------------------------------------------------------------------------------|-----------|-----|----------|-------------------------------------------------------------------------------------------------------------|-------------------------------------------------------------|----|
|             | Levemir Treat-To-Target                                                                                       |           |     |          | R, Davies M, Gerstein HC, Pfeiffer AF, Snoek FJ, Devries JH, Hoekstra JB, Holleman F.                       | Jun;33(6):1176-8. Epub 2010 Mar 3.                          |    |
| NCT00405990 | Male Partner Involvement in the Prevention of MTCT of HIV                                                     | Completed | Yes | 21610487 | Mohlala BK, Boily MC, Gregson S.                                                                            | AIDS. 2011 Jul 31;25(12):1535-41.                           |    |
| NCT00406640 | Study Evaluating Desvenlafaxine Succinate Sustained Release (DVS SR) vs. Escitalopram in Postmenopausal Women | Completed | Yes | 20539246 | Soares CN, Thase ME, Clayton A, Guico-Pabia CJ, Focht K, Jiang Q, Kornstein SG, Ninan P, Kane CP, Cohen LS. | Menopause. 2010 Jul;17(4):700-11.                           |    |
| NCT00407927 | A Study of Epinastine Nasal Spray in Subjects With Seasonal Allergic Rhinitis                                 | Completed | No  |          |                                                                                                             |                                                             | No |
| NCT00408187 | Randomized, Placebo and Ciclosporin Controlled Study of ISA247 in Plaque Psoriasis Patients                   | Completed | No  |          |                                                                                                             |                                                             | No |
| NCT00409539 | SMP-986 Phase 2 Proof of Concept in Patients With Overactive Bladder Syndrome (OABS)                          | Completed | No  |          |                                                                                                             |                                                             | No |
| NCT00409773 | Ezetimibe/Simvastatin in Patients With Metabolic Syndrome                                                     | Completed | Yes | 22108151 | Robinson JG, Ballantyne CM, Hsueh W, Rosen J, Lin J, Shah A, Lowe RS, Hanson ME, Tershakovec AM.            | J Clin Lipidol. 2011 Nov-Dec;5(6):474-82. Epub 2011 Jun 15. |    |
| NCT00411099 | Efficacy, Safety and Tolerability of Agomelatine in the Treatment of Major Depressive Disorder                | Completed | Yes | 20520286 | Zajecka J, Schatzberg A, Stahl S, Shah A, Caputo A, Post A.                                                 | J Clin Psychopharmacol. 2010 Apr;30(2):135-44.              |    |
| NCT00411242 | Efficacy, Safety and Tolerability of Agomelatine in the Treatment of Major Depressive Disorder                | Completed | Yes | 20361916 | Stahl SM, Fava M, Trivedi MH, Caputo A, Shah A, Post A.                                                     | J Clin Psychiatry. 2010 May;71(5):616-26. Epub 2010 Mar 23. |    |

|             |                                                                                                                                |           |     |          |                                                                                                                                                                                                                                                                                |                                                                                   |  |
|-------------|--------------------------------------------------------------------------------------------------------------------------------|-----------|-----|----------|--------------------------------------------------------------------------------------------------------------------------------------------------------------------------------------------------------------------------------------------------------------------------------|-----------------------------------------------------------------------------------|--|
| NCT00411385 | Efficacy of Albumin Interferon Alfa-2b With Ribavirin Compared to Peg-IFN Alfa-2a With Ribavirin in IFN Naive Patients Geno2/3 | Completed | Yes | 20600017 | Nelson DR, Benhamou Y, Chuang WL, Lawitz EJ, Rodriguez-Torres M, Flisiak R, Rasenack JW, Kryczka W, Lee CM, Bain VG, Pianko S, Patel K, Cronin PW, Pulkstenis E, Subramanian GM, McHutchison JG; ACHIEVE-2/3 Study Team.                                                       | Gastroenterology. 2010 Oct;139(4):1267-76. Epub 2010 Jul 1.                       |  |
| NCT00412854 | Study to Assess Safety & Immunogenicity of GSK Biologicals' DTPa/Hib Vaccine vs Separate Administration of DTPa and Hib.       | Completed | Yes | 20399240 | Li G, Zhang H, Zhou W, Ye Q, Li F, Wang H, Hou Q, Xu Y, Ma X, Tan Y, Wang L, Li Y, Li H, Meng F, Liang Q, Liu A, Qin C, Wei W, Liu J, Ruan C, Tao W, Zhang S, et al.                                                                                                           | Vaccine. 2010 Jun 7;28(25):4215-23. Epub 2010 Apr 15.                             |  |
| NCT00413049 | Efficacy/Safety of Valsartan Plus Amlodipine and Amlodipine Alone in Patients With Hypertension                                | Completed | Yes | 20469975 | Ke Y, Zhu D, Hong H, Zhu J, Wang R, Cardenas P, Zhang Y.                                                                                                                                                                                                                       | Curr Med Res Opin. 2010 Jul;26(7):1705-13.                                        |  |
| NCT00413413 | Efficacy/Safety of Valsartan Plus Amlodipine and Valsartan Alone in Patients With Hypertension                                 | Completed | Yes | 21466389 | Huang J, Sun NL, Hao YM, Zhu JR, Tu Y, Curt V, Zhang Y; Trial Investigators.                                                                                                                                                                                                   | Clin Exp Hypertens. 2011;33(3):179-86. Epub 2011 Apr 5.                           |  |
| NCT00413660 | Comparison Of 6 CP-690,550 Doses Vs.Placebo, Each Combined With Methotrexate, For The Treatment Of Rheumatoid Arthritis        | Completed | Yes | 22006202 | Kremer JM, Cohen S, Wilkinson BE, Connell CA, French JL, Gomez-Reino J, Gruben D, Kanik KS, Krishnaswami S, Pascual-Ramos V, Wallenstein G, Zwillich SH.                                                                                                                       | Arthritis Rheum. 2012 Apr;64(4):970-81. doi: 10.1002/art.33419. Epub 2011 Oct 17. |  |
| NCT00417235 | Dressing: Frequency of Change and Evaluation of an Antiseptic-Impregnated Catheter Dressing in ICU Patients                    | Completed | Yes | 19318651 | Timsit JF, Schwebel C, Bouadma L, Geffroy A, Garrouste-Orgeas M, Pease S, Herault MC, Haouache H, Calvino-Gunther S, Gestin B, Armand-Lefevre L, Leflon V, Chaplain C, Benali A, Francais A, Adrie C, Zahar JR, Thuong M, Arrault X, Croize J, Lucet JC; Dressing Study Group. | JAMA. 2009 Mar 25;301(12):1231-41.                                                |  |

|             |                                                                                                                                                    |           |     |          |                                                                                                                                                                                                                                            |                                                                                                                                                                          |    |
|-------------|----------------------------------------------------------------------------------------------------------------------------------------------------|-----------|-----|----------|--------------------------------------------------------------------------------------------------------------------------------------------------------------------------------------------------------------------------------------------|--------------------------------------------------------------------------------------------------------------------------------------------------------------------------|----|
| NCT00418834 | Ezetimibe and Atorvastatin vs. Atorvastatin in Patients Age 65 and Older at High Risk for Coronary Heart Disease (CHD)                             | Completed | Yes | 20185012 | Zieve F, Wenger NK, Ben-Yehuda O, Constance C, Bird S, Lee R, Hanson ME, Jones-Burton C, Tershakovec AM.                                                                                                                                   | Am J Cardiol. 2010 Mar 1;105(5):656-63. Epub 2009 Dec 24.                                                                                                                |    |
| NCT00420316 | Long-term Efficacy and Safety of Subjects Approximately 3 Years After Priming With 2 Doses of GSK Bio's HRV Vaccine.                               | Completed | No  |          |                                                                                                                                                                                                                                            |                                                                                                                                                                          | No |
| NCT00420745 | To Assess Safety, Reactogenicity & Immunogenicity of 2 Doses of GSK's Oral Human Rotavirus Vaccine in Pre-Term Infants                             | Completed | Yes | 22228231 | Omenaca F, Sarlangue J, Szenborn L, Nogueira M, Suryakiran PV, Smolenov IV, Han HH; ROTA-054 Study Group.                                                                                                                                  | Pediatr Infect Dis J. 2012 May;31(5):487-93.                                                                                                                             |    |
| NCT00422084 | Pyronaridine Artesunate (3:1) Versus Coartem?« in P Falciparum Malaria Patients                                                                    | Completed | Yes | 20417857 | Tshefu AK, Gaye O, Kayentao K, Thompson R, Bhatt KM, Sesay SS, Bustos DG, Tjitra E, Bedu-Addo G, Borghini-Fuhrer I, Duparc S, Shin CS, Fleckenstein L; Pyronaridine-artesunate Study Team.                                                 | Lancet. 2010 Apr 24;375(9724):1457-67.                                                                                                                                   |    |
| NCT00423657 | Comparative Study of Ceftaroline vs. Vancomycin Plus Aztreonam in Adult Subjects With Complicated Skin Infections                                  | Completed | Yes | 21115455 | Wilcox MH, Corey GR, Talbot GH, Thye D, Friedland D, Baculik T; CANVAS 2 investigators.                                                                                                                                                    | J Antimicrob Chemother. 2010 Nov;65 Suppl 4:iv53-iv65.                                                                                                                   |    |
| NCT00423670 | Safety and Efficacy of SCH 503034 in Previously Untreated Subjects With Chronic Hepatitis C Infected With Genotype 1 (Study P03523AM2) (COMPLETED) | Completed | Yes | 20692693 | Kwo PY, Lawitz EJ, McCone J, Schiff ER, Vierling JM, Pound D, Davis MN, Galati JS, Gordon SC, Ravendhran N, Rossaro L, Anderson FH, Jacobson IM, Rubin R, Koury K, Pedicone LD, Brass CA, Chaudhri E, Albrecht JK; SPRINT-1 investigators. | Lancet. 2010 Aug 28;376(9742):705-16. Epub 2010 Aug 6. Erratum in: Lancet. 2010 Oct 9;376(9748):1224. SPRINT-1 investigators [added]; multiple investigator names added. |    |
| NCT00423787 | Efficacy and                                                                                                                                       | Completed | No  |          |                                                                                                                                                                                                                                            |                                                                                                                                                                          | No |

|             |                                                                                                                                                                     |            |     |          |                                                                                                                                                                                                        |                                                                            |    |
|-------------|---------------------------------------------------------------------------------------------------------------------------------------------------------------------|------------|-----|----------|--------------------------------------------------------------------------------------------------------------------------------------------------------------------------------------------------------|----------------------------------------------------------------------------|----|
|             | Safety/Tolerability of Ragweed MATA MPL                                                                                                                             |            |     |          |                                                                                                                                                                                                        |                                                                            |    |
| NCT00424008 | Study of Inhaled Glucocorticosteroids/Long-Acting Bronchodilator Drugs in Subjects With Asthma That Have Been Taking Inhaled Glucocorticosteroids (Study P04705AM1) | Completed  | Yes | 22152089 | Bernstein DI, Håbert J, Cheema A, Murphy KR, ChÁrrez-Ojeda I, Matiz-Bueno CE, Kuo WL, Nolte H.                                                                                                         | Allergy Asthma Clin Immunol. 2011 Dec 7;7:21. doi: 10.1186/1710-1492-7-21. |    |
| NCT00424086 | Safety and Immunogenicity Study of an Inactivated Influenza Vaccine (Split Virus, Vero Cell Derived)                                                                | Completed  | No  |          |                                                                                                                                                                                                        |                                                                            | No |
| NCT00424190 | Comparative Study of Cefaroline vs. Vancomycin Plus Aztreonam in Adult Subjects With Complicated Skin Infections                                                    | Completed  | Yes | 21115454 | Corey GR, Wilcox MH, Talbot GH, Thye D, Friedland D, Baculik T; CANVAS 1 investigators.                                                                                                                | J Antimicrob Chemother. 2010 Nov;65 Suppl 4:iv41-51.                       |    |
| NCT00424268 | Effect of Roflumilast in Chronic Obstructive Pulmonary Disease (COPD) Patients Treated With Tiotropium: The HELIOS Study (BY217/M2-128)                             | Completed  | Yes | 19716961 | Fabbri LM, Calverley PM, Izquierdo-Alonso JL, Bundschuh DS, Brose M, Martinez FJ, Rabe KF; M2-127 and M2-128 study groups.                                                                             | Lancet. 2009 Aug 29;374(9691):695-703.                                     |    |
| NCT00425919 | Study Evaluating PPM-204 In Subjects With Type 2 Diabetes                                                                                                           | Terminated | No  |          |                                                                                                                                                                                                        |                                                                            | No |
| NCT00426361 | Evaluation of Safety and Immunogenicity of Co-administering Human Papillomavirus (HPV) Vaccine With Other Vaccines in Healthy Female Subjects                       | Completed  | Yes | 20113920 | Garcia-Sicilia J, Schwarz TF, Carmona A, Peters K, Malkin JE, Tran PM, Behre U, Iturbe EB, Catteau G, Thomas F, Dobbelaere K, Descamps D, Dubin G; HPV Vaccine Adolescent Study Investigators Network. | J Adolesc Health. 2010 Feb;46(2):142-51.                                   |    |

|             |                                                                                                                       |           |     |          |                                                                                                                        |                                                                  |  |
|-------------|-----------------------------------------------------------------------------------------------------------------------|-----------|-----|----------|------------------------------------------------------------------------------------------------------------------------|------------------------------------------------------------------|--|
| NCT00428090 | Rosiglitazone (Extended Release Tablets) As Monotherapy In Subjects With Mild To Moderate Alzheimer's Disease         | Completed | Yes | 20733306 | Gold M, Alderton C, Zvartau-Hind M, Egginton S, Saunders AM, Irizarry M, Craft S, Landreth G, LinnamÄrqi U, Sawchak S. | Dement Geriatr Cogn Disord. 2010;30(2):131-46. Epub 2010 Aug 21. |  |
| NCT00430248 | Efficacy and Safety of Oral Febuxostat in Participants With Gout                                                      | Completed | Yes | 20370912 | Becker MA, Schumacher HR, Espinoza LR, Wells AF, MacDonald P, Lloyd E, Lademacher C.                                   | Arthritis Res Ther. 2010;12(2):R63. Epub 2010 Apr 6.             |  |
| NCT00430508 | Use of the Combination of Olmesartan and Hydrochlorothiazide in Essential Hypertension                                | Completed | Yes | 21107435 | Rump LC, Girerd X, Sellin L, Stegbauer J                                                                               | J Hum Hypertens. 2011 Sep;25(9):565-74.                          |  |
| NCT00430521 | Safety & Immunogenicity of an Alternative Immunization Schedule of GSK Bio's Pandemic Influenza Vaccine (GSK1119711A) | Completed | Yes | 19856521 | Schwarz TF, Horacek T, Knuf M, Damman HG, Roman F, DramÄ© M, Gillard P, Jilg W.                                        | Vaccine. 2009 Oct 23;27(45):6284-90.                             |  |
| NCT00430950 | Combination of Olmesartan and Hydrochlorothiazide in Essential Hypertension                                           | Completed | Yes | 22114906 | Rosenbaum D, Girerd X.                                                                                                 | Curr Med Res Opin. 2012 Feb;28(2):179-86                         |  |
| NCT00432237 | Safety and Efficacy Study of MK0974 in the Acute Migraine (0974-016)(COMPLETED)                                       | Completed | Yes | 19770473 | Connor KM, Shapiro RE, Diener HC, Lucas S, Kost J, Fan X, Fei K, Assaid C, Lines C, Ho TW.                             | Neurology. 2009 Sep 22;73(12):970-7.                             |  |
| NCT00436176 | Improving Diabetes Care for African Americans                                                                         | Completed | Yes | 20048271 | Sequist TD, Fitzmaurice GM, Marshall R, Shaykevich S, Marston A, Safran DG, Ayanian JZ.                                | Ann Intern Med. 2010 Jan 5;152(1):40-6.                          |  |
| NCT00439764 | Health Education vs. Health Education Plus Physical Therapy for Low Back Pain Patients                                | Completed | Yes | 20147875 | Albaladejo C, Kovacs FM, Royuela A, del Pino R, Zamora J; Spanish Back Pain Research Network.                          | Spine (Phila Pa 1976). 2010 Mar 1;35(5):483-96.                  |  |



|             |                                                                                                                                                     |                        |     |          |                                                                                                                                                                                                                                                                                 |                                                                               |    |
|-------------|-----------------------------------------------------------------------------------------------------------------------------------------------------|------------------------|-----|----------|---------------------------------------------------------------------------------------------------------------------------------------------------------------------------------------------------------------------------------------------------------------------------------|-------------------------------------------------------------------------------|----|
| NCT00440102 | Ketamine Versus Etomidate During Rapid Sequence Intubation: Consequences on Hospital Morbidity                                                      | Completed              | Yes | 19573904 | Jabre P, Combes X, Lapostolle F, Dhaouadi M, Ricard-Hibon A, Vivien B, Bertrand L, Beltramini A, Gamand P, Albizzati S, Perdrizet D, Lebail G, Chollet-Xemard C, Maxime V, Brun-Buisson C, Lefrant JY, Bollaert PE, Megarbane B, Ricard JD, Anguel N, Vicaut E, Adnet F; et al. | Lancet. 2009 Jul 25;374(9686):293-300. Epub 2009 Jul 1.                       |    |
| NCT00441246 | Phase 4 Study - Mucinex D as Adjunct Therapy                                                                                                        | Completed              | Yes | 18654069 | LaForce C, Gentile DA, Skoner DP.                                                                                                                                                                                                                                               | Postgrad Med. 2008 Jul;120(2):53-9.                                           |    |
| NCT00441350 | Olmesartan/HCTZ 40/12.5 mg Combination Therapy Versus Olmesartan Medoxomil 40 mg Monotherapy in Essential Hypertension                              | Completed              | Yes | 20593911 | Fogari R, Taddei S, Holm-Bentzen M, Baszak J, Melani L, Schumacher K.                                                                                                                                                                                                           | Clin Drug Investig. 2010;30(9):581-97. doi: 10.2165/11536710-000000000-00000. |    |
| NCT00441727 | Study of Esomeprazole 20 mg or 40 mg vs Placebo Effectiveness on the Occurrence of Peptic Ulcers in Subjects on Low Dose Acetylsalicylic Acid (LDA) | Completed              | Yes | 21415072 | Scheiman JM, Devereaux PJ, Herlitz J, Katelaris PH, Lanas A, Veldhuyzen van Zanten S, Nauck E, Svedberg LE.                                                                                                                                                                     | Heart. 2011 May;97(10):797-802. Epub 2011 Mar 17.                             |    |
| NCT00442442 | Clinical Evaluation of Mosquito Coils to Control Malaria in China                                                                                   | Active, not recruiting | No  |          |                                                                                                                                                                                                                                                                                 |                                                                               | No |
| NCT00442936 | MK0974 Pivotal Study 1 - WW (With Active Comparator)                                                                                                | Completed              | Yes | 19036425 | Ho TW, Ferrari MD, Dodick DW, Galet V, Kost J, Fan X, Leibensperger H, Froman S, Assaid C, Lines C, Koppen H, Winner PK.                                                                                                                                                        | Lancet. 2008 Dec 20;372(9656):2115-23. Epub 2008 Nov 25.                      |    |
| NCT00443287 | Efficacy and Safety of HMR1766 in Patients With Fontaine Stage II Peripheral Arterial Disease                                                       | Completed              | No  |          |                                                                                                                                                                                                                                                                                 |                                                                               | No |
| NCT00443794 | The Indian POLYCAP                                                                                                                                  | Completed              | Yes | 19339045 | Indian Polycap Study (TIPS),                                                                                                                                                                                                                                                    | Lancet. 2009 Apr                                                              |    |

|             |                                                                                                                              |            |     |          |                                                                                                                                                                                                      |                                                              |     |
|-------------|------------------------------------------------------------------------------------------------------------------------------|------------|-----|----------|------------------------------------------------------------------------------------------------------------------------------------------------------------------------------------------------------|--------------------------------------------------------------|-----|
|             | Study (TIPS)                                                                                                                 |            |     |          | Yusuf S, Pais P, Afzal R, Xavier D, Teo K, Eikelboom J, Sigamani A, Mohan V, Gupta R, Thomas N.                                                                                                      | 18;373(9672):1341-51. Epub 2009 Mar 30.                      |     |
| NCT00444275 | Nexium (Esomeprazole) in Symptom Adapted Therapy in GERD Patients                                                            | Completed  | No  |          |                                                                                                                                                                                                      |                                                              | Yes |
| NCT00444925 | Clinical Trial to Evaluate the Efficacy and Safety of Fesoterodine in Comparison to Tolterodine for Overactive Bladder (OAB) | Completed  | Yes | 21428726 | Corcos J, Angulo JC, Garely AD, Carlsson M, Gong J, Guan Z; Fesoterodine Assessment and Comparison Versus Tolterodine (FACT) Study Group.                                                            | Curr Med Res Opin. 2011 May;27(5):1059-65. Epub 2011 Mar 23. |     |
| NCT00445679 | Paroxetine-Referenced Study Evaluating Three Doses of DVS SR in Outpatients With MDD                                         | Completed  | No  |          |                                                                                                                                                                                                      |                                                              | No  |
| NCT00446199 | Low-dose Hormone Therapy for Relief of Vasomotor Symptoms                                                                    | Completed  | No  |          |                                                                                                                                                                                                      |                                                              | Yes |
| NCT00447603 | A Study of Losartan Compared to Losartan/HCTZ in Pediatric Patients With Hypertension (0954A-327)(WITHDRAWN)                 | Terminated | No  |          |                                                                                                                                                                                                      |                                                              | No  |
| NCT00448461 | Antithrombotic Regimens and Outcome                                                                                          | Completed  | Yes | 20381652 | Parodi G, Migliorini A, Valenti R, Bellandi B, Signorini U, Moschi G, Buonamici P, Cerisano G, Antoniucci D.                                                                                         | Am J Cardiol. 2010 Apr 15;105(8):1053-9. Epub 2010 Feb 20.   |     |
| NCT00449670 | Assess Consistency of Immunogenicity of GlaxoSmithKline Biologicals' Pandemic Influenza Vaccine (GSK1562902A) in Adults      | Completed  | Yes | 19683087 | Chu DW, Hwang SJ, Lim FS, Oh HM, Thongcharoen P, Yang PC, Bock HL, Dramm M, Gillard P, Hutagalung Y, Tang H, Teoh YL, Ballou RW; H5N1 Flu Study Group for Hong Kong, Singapore, Taiwan and Thailand. | Vaccine. 2009 Dec 9;27(52):7428-35. Epub 2009 Aug 13.        |     |
| NCT00449930 | Sitagliptin                                                                                                                  | Completed  | Yes | 20070351 | Aschner P, Katzeff HL, Guo H,                                                                                                                                                                        | Diabetes Obes Metab. 2010                                    |     |

|             |                                                                                                                              |           |     |          |                                                                                                                             |                                                                                          |  |
|-------------|------------------------------------------------------------------------------------------------------------------------------|-----------|-----|----------|-----------------------------------------------------------------------------------------------------------------------------|------------------------------------------------------------------------------------------|--|
|             | Comparative Study in Patients With Type 2 Diabetes                                                                           |           |     |          | Sunga S, Williams-Herman D, Kaufman KD, Goldstein BJ; Sitagliptin Study 049 Group.                                          | Mar;12(3):252-61. Epub 2009 Nov 25.                                                      |  |
| NCT00450216 | Efficacy and Safety Study of HZT-501 in Subjects Requiring Nonsteroidal Anti-Inflammatory Drug (NSAID) Treatment             | Completed | Yes | 22186979 | Laine L, Kivitz AJ, Bello AE, Grahn AY, Schiff MH, Taha AS.                                                                 | Am J Gastroenterol. 2012 Mar;107(3):379-86. doi: 10.1038/ajg.2011.443. Epub 2011 Dec 20. |  |
| NCT00450437 | A Study to Evaluate Safety and Immune Response of Novartis Meningococcal ACWY Conjugate Vaccine In US Adolescents and Adults | Completed | Yes | 19476428 | Jackson LA, Baxter R, Reisinger K, Karsten A, Shah J, Bedell L, Dull PM; V59P13 Study Group.                                | Clin Infect Dis. 2009 Jul 1;49(1):e1-10.                                                 |  |
| NCT00450658 | Efficacy and Safety Study of HZT-501 in Reducing the Risk of Ibuprofen-associated Ulcers                                     | Completed | Yes | 22186979 | Laine L, Kivitz AJ, Bello AE, Grahn AY, Schiff MH, Taha AS.                                                                 | Am J Gastroenterol. 2012 Mar;107(3):379-86. doi: 10.1038/ajg.2011.443. Epub 2011 Dec 20. |  |
| NCT00452426 | Safety and Effectiveness of a Computer-Assisted Personalized Sedation (CAPS) Device for Propofol Delivery During Endoscopy   | Completed | Yes | 21168841 | Pambianco DJ, Vargo JJ, Pruitt RE, Hardi R, Martin JF.                                                                      | Gastrointest Endosc. 2011 Apr;73(4):765-72. Epub 2010 Dec 18.                            |  |
| NCT00452686 | Study to Assess Safety & Immunogenicity of GSK Biologicals' Boostrix (dTpa) Vaccine vs. Chinese DT Vaccine                   | Completed | Yes | 20215881 | Zhu F, Zhang S, Hou Q, Zhang Y, Xu Y, Ma X, Lu X, Pan H, Chen D, Ramakrishnan G, Zhao R, Tang H, Van Der Meeren O, Bock HL. | Hum Vaccin. 2010 Mar 3;6(3). [Epub ahead of print]                                       |  |
| NCT00453986 | Lot Consistency, Immuno, Safety of Meningococcal Vaccine GSK134612 Given With Fluarix?äó to 18-55 Year-Old Adults            | Completed | Yes | 22485050 | Dbaibo G, Macalalad N, Reyes MR, Dimaano E, Bianco V, Baine Y, Miller J.                                                    | Hum Vaccin Immunother. 2012 Jul;8(7):873-80. doi: 10.4161/hv.20211. Epub 2012 Apr 9.     |  |

|             |                                                                                                                                                            |           |     |          |                                                                                                                                                     |                                                                         |    |
|-------------|------------------------------------------------------------------------------------------------------------------------------------------------------------|-----------|-----|----------|-----------------------------------------------------------------------------------------------------------------------------------------------------|-------------------------------------------------------------------------|----|
| NCT00454909 | Immunogenicity and Safety of Meningococcal Vaccine GSK134612 vs. Menactra?« in Healthy Adolescent/Adults Aged 10-25 Years.                                 | Completed | Yes | 21200360 | Baxter R, Baine Y, Ensor K, Bianco V, Friedland LR, Miller JM.                                                                                      | Pediatr Infect Dis J. 2011 Mar;30(3):e41-8.                             |    |
| NCT00456521 | A Study of Naltrexone SR/Bupropion SR and Placebo in Obese Subjects Participating in a Behavior Modification Program                                       | Completed | Yes | 20559296 | Wadden TA, Foreyt JP, Foster GD, Hill JO, Klein S, O'Neil PM, Perri MG, Pi-Sunyer FX, Rock CL, Erickson JS, Maier HN, Kim DD, Dunayevich E.         | Obesity (Silver Spring). 2011 Jan;19(1):110-20. Epub 2010 Jun 17.       |    |
| NCT00457457 | Study the Effects of Different Doses of UK-369,003 in Men With Lower Urinary Tract Symptoms.                                                               | Completed | Yes | 20184577 | Tamimi NA, Mincik I, Haughie S, Lamb J, Crossland A, Ellis P.                                                                                       | BJU Int. 2010 Sep;106(5):674-80. doi: 10.1111/j.1464-410X.2010.09204.x. |    |
| NCT00463437 | Pneumococcal Vaccine Booster Study in Healthy Children 11-18 Months Old Previously Primed With the Same Vaccines                                           | Completed | Yes | 19325450 | Wysocki J, Tejedor JC, Grunert D, Konior R, Garcia-Sicilia J, Knuf M, Bernard L, Dieussaert I, Schuerman L.                                         | Pediatr Infect Dis J. 2009 Apr;28(4 Suppl):S77-88.                      |    |
| NCT00463567 | 26 Week Efficacy, Safety and Tolerability Study of Indacaterol in Patients With Chronic Obstructive Pulmonary Disease (COPD)                               | Completed | Yes | 20463178 | Donohue JF, Fogarty C, Lrjvall J, Mahler DA, Worth H, Yorgancioglu A, Iqbal A, Swales J, Owen R, Higgins M, Kramer B; INHANCE Study Investigators. | Am J Respir Crit Care Med. 2010 Jul 15;182(2):155-62. Epub 2010 May 12. |    |
| NCT00463606 | A Multicenter Study Comparing the Safety and Efficacy of ABT-335 and Rosuvastatin Calcium Combination Therapy to Monotherapy in Subjects With Dyslipidemia | Completed | Yes | 20953684 | Roth EM, Rosenson RS, Carlson DM, Fukumoto SM, Setze CM, Blasetto JW, Khurmi NS, Stolzenbach JC, Williams LA.                                       | Cardiovasc Drugs Ther. 2010 Dec;24(5-6):421-8.                          |    |
| NCT00464243 | Efficacy and Safety of Volinanserin on Sleep                                                                                                               | Completed | No  |          |                                                                                                                                                     |                                                                         | No |

|             |                                                                                                                  |            |     |          |                                                                                                                         |                                                                   |    |
|-------------|------------------------------------------------------------------------------------------------------------------|------------|-----|----------|-------------------------------------------------------------------------------------------------------------------------|-------------------------------------------------------------------|----|
|             | Maintenance Insomnia - Polysomnographic Study                                                                    |            |     |          |                                                                                                                         |                                                                   |    |
| NCT00464672 | Safety, and Immunogenicity of Two Influenza Vaccines in Healthy Subjects 3 to 64 Years Old                       | Completed  | Yes | 22691101 | Tregnaghi MW, Stamboulian D, VanadAa PC, Tregnaghi JP, Calvari M, Fragapane E, Casula D, Pellegrini M, Groth N.         | Viral Immunol. 2012 Jun;25(3):216-25. doi: 10.1089/vim.2011.0063. |    |
| NCT00464815 | Non-Inferiority of Meningococcal Vaccine GSK134612 Versus Mencevax?ãó in 11-17 Year-Old Subjects                 | Completed  | Yes | 21343698 | Bermal N, Huang LM, Dubey AP, Jain H, Bavdekar A, Lin TY, Bianco V, Baine Y, Miller JM.                                 | Hum Vaccin. 2011 Feb;7(2):239-47. Epub 2011 Feb 1.                |    |
| NCT00465816 | Primary Study to Demonstrate Non-inferiority and Immunogenicity of GSK Biologicals' Meningococcal Vaccine 134612 | Completed  | Yes | 22107850 | Ã~stergaard L, Silfverdal SA, Berglund J, Flodmark CE, West C, Bianco V, Baine Y, Miller JM.                            | Vaccine. 2012 Jan 17;30(4):774-83. Epub 2011 Nov 19.              |    |
| NCT00466167 | Pivotal Study in Advanced Parkinsons Disease Patients                                                            | Completed  | Yes | 21832216 | Schapira AH, Barone P, Hauser RA, Mizuno Y, Rascol O, Busse M, Salin L, Juhel N, Poewe W; Pramipexole ER Studies Group. | Neurology. 2011 Aug 23;77(8):767-74. Epub 2011 Aug 10.            |    |
| NCT00466297 | Interprofessional Collaborative Communication in Acute Care Hospital Teams                                       | Completed  | Yes | 17877830 | Zwarenstein M, Reeves S, Russell A, Kenaszchuk C, Conn LG, Miller KL, Lingard L, Thorpe KE.                             | Trials. 2007 Sep 18;8:23.                                         |    |
| NCT00470158 | Delivery of Iron and Zinc Supplements: Evaluation of Interaction Effect on Biochemical and Clinical Outcomes     | Completed  | Yes | 19904293 | Chang S, El Arifeen S, Bari S, Wahed MA, Rahman KM, Rahman MT, Mahmud AB, Begum N, Zaman K, Baqui AH, Black RE.         | Eur J Clin Nutr. 2010 Feb;64(2):153-60. Epub 2009 Nov 11.         |    |
| NCT00471094 | Safety and Efficacy of Ilaprazole 5, 20 and 40 mg QD and Lansoprazole 30 mg QD on Healing of Erosive Esophagitis | Completed  | No  |          |                                                                                                                         |                                                                   | No |
| NCT00471237 | A Phase II Study                                                                                                 | Terminated | Yes | 21593114 | Fitzpatrick LA, Dabrowski CE,                                                                                           | J Clin Endocrinol Metab.                                          |    |

|             |                                                                                                                                |           |     |          |                                                                                                                                                                                                      |                                                                                   |     |
|-------------|--------------------------------------------------------------------------------------------------------------------------------|-----------|-----|----------|------------------------------------------------------------------------------------------------------------------------------------------------------------------------------------------------------|-----------------------------------------------------------------------------------|-----|
|             | Evaluating SB-751689 in Post-Menopausal Women With Osteoporosis.                                                               |           |     |          | Ciconetti G, Gordon DN, Papapoulos S, Bone HG 3rd, Bilezikian JP.                                                                                                                                    | 2011 Aug;96(8):2441-9. Epub 2011 May 18.                                          |     |
| NCT00472667 | PROcalcitonin Reduce Antibiotic Treatments in Acute-Ill Patients (PRORATA)                                                     | Completed | Yes | 20097417 | Bouadma L, Luyt CE, Tubach F, Cracco C, Alvarez A, Schwebel C, Schortgen F, Lasocki S, Veber B, Dehoux M, Bernard M, Pasquet B, RÅ©gnier B, Brun-Buisson C, Chastre J, Wolff M; PRORATA trial group. | Lancet. 2010 Feb 6;375(9713):463-74. Epub 2010 Jan 25.                            |     |
| NCT00474266 | Safety & Immunogenicity Study of Meningococcal Vaccine GSK134612 Given With Priorix-Tetra?áo to 12-23 Month-Old Children       | Completed | Yes | 21443965 | Vesikari T, Karvonen A, Bianco V, Van der Wielen M, Miller J.                                                                                                                                        | Vaccine. 2011 Jun 6;29(25):4274-84. Epub 2011 Apr 6.                              |     |
| NCT00474487 | A Study to Evaluate Safety and Immune Response of Novartis Meningococcal ACWY Vaccine In Healthy Adults                        | Completed | Yes | 20655261 | Stambouliau D, Lopardo G, Lopez P, Cortes-Barbosa C, Valencia A, Bedell L, Karsten A, Dull PM.                                                                                                       | Int J Infect Dis. 2010 Oct;14(10):e868-75. Epub 2010 Jul 22.                      |     |
| NCT00475930 | Chlorhexidine Impregnated Cloths to Prevent Skin and Soft Tissue Infections in Marine Officer Candidates                       | Completed | Yes | 21028984 | Whitman TJ, Herlihy RK, Schlett CD, Murray PR, Grandits GA, Ganesan A, Brown M, Mancuso JD, Adams WB, Tribble DR.                                                                                    | Infect Control Hosp Epidemiol. 2010 Dec;31(12):1207-15. Epub 2010 Oct 28.         |     |
| NCT00477490 | Efficacy and Safety of Desmopressin Melt for the Treatment of Nocturia                                                         | Completed | Yes | 22447415 | Weiss JP, Zinner NR, Klein BM, NÅrgaard JP.                                                                                                                                                         | Neurourol Urodyn. 2012 Apr;31(4):441-7. doi: 10.1002/nau.22243. Epub 2012 Mar 22. |     |
| NCT00478023 | A Study to Evaluate the Efficacy and Safety of Tapentadol (CG5503) in the Treatment of Acute Pain After Abdominal Hysterectomy | Completed | No  |          |                                                                                                                                                                                                      |                                                                                   | Yes |
| NCT00478621 | Human Papillomavirus Vaccine Safety & Immunogenicity Trial                                                                     | Completed | No  |          |                                                                                                                                                                                                      |                                                                                   | No  |

|             |                                                                                                          |            |     |          |                                                                                                                           |                                                            |     |
|-------------|----------------------------------------------------------------------------------------------------------|------------|-----|----------|---------------------------------------------------------------------------------------------------------------------------|------------------------------------------------------------|-----|
|             | in Healthy Young Adult Women With HPV Vaccine (GSK1674330A)                                              |            |     |          |                                                                                                                           |                                                            |     |
| NCT00479388 | Study of Extended Release Niacin/Laropiprant on Lipids                                                   | Completed  | Yes | 20518948 | Shah S, Ceska R, Gil-Extremera B, Paolini JF, Giezek H, Vandormael K, Mao A, McCrary Sisk C, Maccubbin D.                 | Int J Clin Pract. 2010 May;64(6):727-38.                   |     |
| NCT00479401 | Efficacy, Safety, Tolerability of Pramipexol ER Versus Pramipexol IR Versus Placebo in Early PD Patients | Completed  | Yes | 21832218 | Poewe W, Rascol O, Barone P, Hauser RA, Mizuno Y, Haaksma M, Salin L, Juhel N, Schapira AH; Pramipexole ER Studies Group. | Neurology. 2011 Aug 23;77(8):759-66. Epub 2011 Aug 10.     |     |
| NCT00479648 | A Phase 2 Study of Immunogenicity, Safety and Tolerability of CSL412 in Elderly Participants             | Completed  | No  |          |                                                                                                                           |                                                            | No  |
| NCT00479882 | MK0524B Lipid Study                                                                                      | Completed  | No  |          |                                                                                                                           |                                                            | No  |
| NCT00482547 | Study of a Urethral Catheter Coated With Eluting Silver Salts (SUCCESS)                                  | Terminated | No  |          |                                                                                                                           |                                                            | Yes |
| NCT00483470 | Immunogenicity and Safety of Sanofi Pasteur's AVAXIM 80U Pediatric Vaccine Followed by Booster Dose      | Completed  | No  |          |                                                                                                                           |                                                            | No  |
| NCT00485758 | Extended Niacin/Laropiprant in Patients With Type 2 Diabetes                                             | Completed  | Yes | N/a      | MacLean, A., McKenney, J. M., Scott, R., Brinton, E., Bays, H. E., Mitchel, Y. B., ... & Maccubbin, D. L                  | British Journal of Cardiology. 2011; 18(1): 37-45.         |     |
| NCT00486200 | A Study With ASP2151 in Subjects With Recurrent Episodes of Genital Herpes                               | Completed  | Yes | 22351940 | Tyring S, Wald A, Zadeikis N, Dhadda S, Takenouchi K, Rorig R.                                                            | J Infect Dis. 2012 Apr 1;205(7):1100-10. Epub 2012 Feb 20. |     |
| NCT00486811 | A Study to Evaluate the Efficacy and Safety of CG5503 Prolonged Release (PR) in Subjects With            | Completed  | No  |          |                                                                                                                           |                                                            | Yes |

|             |                                                                                                                                                                                                                         |           |     |          |                                                                                             |                                                                         |    |
|-------------|-------------------------------------------------------------------------------------------------------------------------------------------------------------------------------------------------------------------------|-----------|-----|----------|---------------------------------------------------------------------------------------------|-------------------------------------------------------------------------|----|
|             | Moderate to Severe Chronic Pain Due to Osteoarthritis of the Knee                                                                                                                                                       |           |     |          |                                                                                             |                                                                         |    |
| NCT00488267 | Trial to Evaluate the Efficacy of ThermoProfen (Matrix Transdermal Ketoprofen/CHADD?äó System) in Patients With Mild to Moderate Pain Associated With Osteoarthritis of the Knee                                        | Completed | No  |          |                                                                                             |                                                                         | No |
| NCT00489424 | Acetaminophen or Fluvastatin Compared to Placebo on the Transient Post-Dose Symptoms (PDS) Following an Intravenous (i.v.) Infusion of a Single Dose of Zoledronic Acid 5mg, in Postmenopausal Women With Low Bone Mass | Completed | Yes | 21116816 | Silverman SL, Kriegman A, Goncalves J, Kianifard F, Carlson T, Leary E.                     | Osteoporos Int. 2011 Aug;22(8):2337-45. Epub 2010 Nov 30.               |    |
| NCT00489736 | Efficacy & Safety of Dronedarone Versus Amiodarone for the Maintenance of Sinus Rhythm in Patients With Atrial Fibrillation                                                                                             | Completed | Yes | 20384650 | Le Heuzey JY, De Ferrari GM, Radzik D, Santini M, Zhu J, Davy JM.                           | J Cardiovasc Electrophysiol. 2010 Jun 1;21(6):597-605. Epub 2010 Apr 6. |    |
| NCT00490919 | Buprenorphine Transdermal System (BTDS) in Subjects With Moderate to Severe Chronic Low Back Pain                                                                                                                       | Completed | Yes | 21945130 | Steiner DJ, Sitar S, Wen W, Sawyerr G, Munera C, Ripa SR, Landau C.                         | J Pain Symptom Manage. 2011 Dec;42(6):903-17. Epub 2011 Sep 25.         |    |
| NCT00492557 | Study Evaluating Safety and Immunogenicity of 13-Valent Pneumococcal                                                                                                                                                    | Completed | Yes | 21619909 | Schwarz TF, Flamaing J, RÃ¼mke HC, Penzes J, Juergens C, Wenz A, Jayawardene D, Giardina P, | Vaccine. 2011 Jul 18;29(32):5195-202. Epub 2011 May 25.                 |    |



|             |                                                                                                                             |           |     |          |                                                                                                                                                                                               |                                                                |    |
|-------------|-----------------------------------------------------------------------------------------------------------------------------|-----------|-----|----------|-----------------------------------------------------------------------------------------------------------------------------------------------------------------------------------------------|----------------------------------------------------------------|----|
|             | Conjugate Vaccine With Influenza Vaccine in Adults                                                                          |           |     |          | Emini EA, Gruber WC, Schmoele-Thoma B.                                                                                                                                                        |                                                                |    |
| NCT00497393 | Clinical Decision Unit (CDU) - Evaluation of a Novel Approach to Address Emergency Department Overcrowding                  | Completed | No  |          |                                                                                                                                                                                               |                                                                | No |
| NCT00501111 | Proof of Concept Study of Cognitive Improvement in Patients With Alzheimer's Disease                                        | Completed | Yes | 21258153 | FrÄ¶lich L, Ashwood T, Nilsson J, Eckerwall G; Sirocco Investigators.                                                                                                                         | J Alzheimers Dis. 2011;24(2):363-74.                           |    |
| NCT00501137 | A Controlled Trial to Assess the Immunogenicity of a Proposed Paediatric Dosing Schedule of Human Papillomavirus Vaccine    | Completed | Yes | 21248158 | Krajden M, Cook D, Yu A, Chow R, Mei W, McNeil S, Money D, Dionne M, Karunakaran KP, Palefsky JM, Dobson S, Ogilvie G, Petric M.                                                              | Clin Vaccine Immunol. 2011 Mar;18(3):418-23. Epub 2011 Jan 19. |    |
| NCT00502775 | Fluticasone Furoate Nasal Spray Versus Oral Fexofenadine                                                                    | Completed | Yes | 19463203 | Andrews CP, Martin BG, Jacobs RL, Mohar DE, Diaz JD, Amar NJ, Kaiser HB, Vandewalker ML, Bernstein J, Toler WT, Prillaman BA, Dalal AA, Lee LA, Philpot EE.                                   | Allergy Asthma Proc. 2009 Mar-Apr;30(2):128-38.                |    |
| NCT00505752 | Investigation of a Long Acting Follicle Stimulating Hormone in Women Undergoing Assisted Reproductive Technology (ART)      | Completed | No  |          |                                                                                                                                                                                               |                                                                | No |
| NCT00508261 | Co-Administration of Meningococcal Vaccine GSK134612 With Infanrix Hexa?ac Versus Individual Administration of Each Vaccine | Completed | Yes | 21420417 | Knuf M, Pantazi-Chatzikonstantinou A, Pfletschinger U, Tichmann-Schumann I, Maurer H, Maurer L, Fischbach T, Zinke H, Pankow-Culot H, Papaevangelou V, Bianco V, Van der Wielen M, Miller JM. | Vaccine. 2011 Jun 6;29(25):4264-73. Epub 2011 Mar 21.          |    |
| NCT00509015 | Mass-Drug Administration to Reduce Malaria                                                                                  | Completed | Yes | 20194698 | Shekalaghe SA, ter Braak R, Daou M, Kavishe R, van den Bijllaardt W, van den Bosch S,                                                                                                         | Antimicrob Agents Chemother. 2010 May;54(5):1762-8. Epub       |    |

|             |                                                                                                                             |           |     |          |                                                                                                                                                                         |                                                                                 |     |
|-------------|-----------------------------------------------------------------------------------------------------------------------------|-----------|-----|----------|-------------------------------------------------------------------------------------------------------------------------------------------------------------------------|---------------------------------------------------------------------------------|-----|
|             | Transmission                                                                                                                |           |     |          | Koenderink JB, Luty AJ, Whitty CJ, Drakeley C, Sauerwein RW, Bousema T.                                                                                                 | 2010 Mar 1.                                                                     |     |
| NCT00509873 | A Study of the Safety and Efficacy of Gatifloxacin in Patients With Bacterial Conjunctivitis                                | Completed | No  |          |                                                                                                                                                                         |                                                                                 | Yes |
| NCT00510159 | Comparing Praziquantel Versus Artesunate + Sulfamethoxypyrazine /Pyrimethamine for Treating Schistosomiasis                 | Completed | Yes | 19802383 | Sissoko MS, Dabo A, Traoré H, Diallo M, Traoré B, Konaté D, Niaré B, Diakité M, Kamaté B, Traoré A, Bathily A, Tapily A, Touré OB, Cauwenbergh S, Jansen HF, Doumbo OK. | PLoS One. 2009 Oct 5;4(10):e6732.                                               |     |
| NCT00514904 | Non-Inferiority of Meningococcal Vaccine GSK134612 Versus Mencevax® in 2-10 Year Old Subjects                               | Completed | Yes | 21278617 | Memish ZA, Dbaibo G, Montellano M, Verghese VP, Jain H, Dubey AP, Bianco V, Van der Wielen M, Gatchalian S, Miller JM.                                                  | Pediatr Infect Dis J. 2011 Apr;30(4):e56-62.                                    |     |
| NCT00520923 | A Study for Patients With Schizophrenia                                                                                     | Completed | Yes | 21508856 | Kinon BJ, Zhang L, Millen BA, Osuntokun OO, Williams JE, Kollack-Walker S, Jackson K, Kryzhanovskaya L, Jarkova N; and the HBBI Study Group.                            | J Clin Psychopharmacol. 2011 Jun;31(3):349-55.                                  |     |
| NCT00529451 | Safety and Efficacy of Aliskiren 300 mg, 150 mg and 75 mg in Patients With Essential Hypertension Compared to Ramipril 5 mg | Completed | Yes | 21900941 | Zhu JR, Sun NL, Yang K, Hu J, Xu G, Hong H, Wang R, Tu YM, Ritter S, Keefe D; trial investigators.                                                                      | Hypertens Res. 2012 Jan;35(1):28-33. doi: 10.1038/hr.2011.150. Epub 2011 Sep 8. |     |
| NCT00529529 | Safety of Indacaterol in Patients (≥12 Years) With Moderate to Severe Persistent Asthma                                     | Completed | No  |          |                                                                                                                                                                         |                                                                                 | Yes |
| NCT00529620 | Three Alternative Drug Regimens for Malaria Seasonal Preventive Treatment in Senegal                                        | Completed | Yes | 19784374 | Cisse B, Cairns M, Faye E, NDiaye O, Faye B, Cames C, Cheng Y, NDiaye M, L'AC, Simondon K, Trape JF, Faye O, NDiaye JL, Gaye O, Greenwood B, Milligan P.                | PLoS One. 2009 Sep 28;4(9):e7164.                                               |     |

|             |                                                                                                                       |            |     |          |                                                                                                                                                        |                                                                                     |     |
|-------------|-----------------------------------------------------------------------------------------------------------------------|------------|-----|----------|--------------------------------------------------------------------------------------------------------------------------------------------------------|-------------------------------------------------------------------------------------|-----|
| NCT00532298 | Non-Inferiority of Various GSK Bio's Influenza Vaccine Presentations in Adults Aged 65 Years and Over                 | Completed  | No  |          |                                                                                                                                                        |                                                                                     | Yes |
| NCT00532558 | Efficacy of Lapaquistat Acetate on Blood Cholesterol Levels in Treating Subjects With Hypercholesterolemia            | Terminated | No  |          |                                                                                                                                                        |                                                                                     | No  |
| NCT00536471 | A Study Comparing Duloxetine and Placebo in Assessing Energy and Vitality in Major Depressive Disorder (MDD) Patients | Completed  | Yes | 22241678 | Oakes TM, Myers AL, Marangell LB, Ahl J, Prakash A, Thase ME, Kornstein SG.                                                                            | Hum Psychopharmacol. 2012 Jan;27(1):47-56. doi: 10.1002/hup.1262. Epub 2012 Jan 13. |     |
| NCT00536731 | Symbicort Rapihaler Therapeutic Equivalence Study                                                                     | Completed  | No  |          |                                                                                                                                                        |                                                                                     | Yes |
| NCT00537264 | A Comparison of Computerised Versus Interviewer-Administered Approach for Assessing Health-Related Quality of Life    | Completed  | No  |          |                                                                                                                                                        |                                                                                     | No  |
| NCT00537420 | A Study of Nasal PYY3-36 and Placebo for Weight Loss in Obese Subjects                                                | Completed  | No  |          |                                                                                                                                                        |                                                                                     | No  |
| NCT00538512 | Comparative Study of Influenza Vaccines in Adults, FLUVACS-year 4                                                     | Completed  | Yes | 19776407 | Monto AS, Ohmit SE, Petrie JG, Johnson E, Truscon R, Teich E, Rotthoff J, Boulton M, Victor JC.                                                        | N Engl J Med. 2009 Sep 24;361(13):1260-7.                                           |     |
| NCT00539721 | A Randomized Controlled Study of Rolapitant for the Prevention of Nausea and Vomiting Following Surgery               | Completed  | Yes | 21385988 | Gan TJ, Gu J, Singla N, Chung F, Pearman MH, Bergese SD, Habib AS, Candiotti KA, Mo Y, Huyck S, Creed MR, Cantillon M; Rolapitant Investigation Group. | Anesth Analg. 2011 Apr;112(4):804-12. Epub 2011 Mar 8.                              |     |

|             |                                                                                                                           |            |     |          |                                                                                                                                                                                                                            |                                                       |     |
|-------------|---------------------------------------------------------------------------------------------------------------------------|------------|-----|----------|----------------------------------------------------------------------------------------------------------------------------------------------------------------------------------------------------------------------------|-------------------------------------------------------|-----|
|             | (Study P04937AM1)(COMPLETED)                                                                                              |            |     |          |                                                                                                                                                                                                                            |                                                       |     |
| NCT00540228 | Study to Evaluate an Influenza Vaccine Candidate                                                                          | Completed  | No  |          |                                                                                                                                                                                                                            |                                                       | No  |
| NCT00540592 | Immunogenicity and Safety Study to Evaluate Different Formulations of GSK Biologicals' Influenza Vaccine GSK576389A       | Completed  | No  |          |                                                                                                                                                                                                                            |                                                       | Yes |
| NCT00541242 | Safety and Efficacy of Bimatoprost Compared With Latanoprost in Patients With Glaucoma or Ocular Hypertension             | Completed  | No  |          |                                                                                                                                                                                                                            |                                                       | Yes |
| NCT00541320 | Phase IIa Venous Thromboembolism (VTE) Prevention Study In Total Knee Replacement (TKR)                                   | Terminated | No  |          |                                                                                                                                                                                                                            |                                                       | No  |
| NCT00541385 | Pyronaridine Artesunate 3:1 Granule Formulation vs. Coartem?? Crushed Tablets in P. Falciparum Malaria Pediatric Patients | Completed  | Yes | 23113947 | Kayentao K, Doumbo OK, PAnali LK, Offianan AT, Bhatt KM, Kimani J, Tshefu AK, Kokolomami JH, Ramharter M, de Salazar PM, Tiono AB, OuAdraogo A, Bustos MD, Quicho F, Borghini-Fuhrer I, Duparc S, Shin CS, Fleckenstein L. | Malar J. 2012 Oct 31;11(1):364. [Epub ahead of print] |     |
| NCT00542685 | A 10-Week Study Evaluating the Efficacy And Safety of PD 0332334 for the Treatment of Generalized Anxiety Disorder        | Completed  | No  |          |                                                                                                                                                                                                                            |                                                       | No  |
| NCT00546507 | Study Evaluating the Efficacy and Safety of Topical Diclofenac Spray in Osteoarthritis of the Knee: Trial I               | Completed  | No  |          |                                                                                                                                                                                                                            |                                                       | No  |

|             |                                                                                                                                       |           |     |          |                                                                                                                               |                                                                                                               |     |
|-------------|---------------------------------------------------------------------------------------------------------------------------------------|-----------|-----|----------|-------------------------------------------------------------------------------------------------------------------------------|---------------------------------------------------------------------------------------------------------------|-----|
| NCT00546832 | Study Evaluating the Efficacy and Safety of Topical Diclofenac Spray in Osteoarthritis of the Knee: Trial II                          | Completed | No  |          |                                                                                                                               |                                                                                                               | No  |
| NCT00547248 | Pneumococcal Vaccine Booster Study in Healthy Children 12-18 Mths Old Previously Primed With the Same Vaccines                        | Completed | Yes | 20980933 | Bernal N, Szenborn L, Edison A, Hernandez M, Pejcz J, Majda-Stanislawska E, Gatchalian S, Fanic A, Dieussaert I, Schuerman L. | Pediatr Infect Dis J. 2011 Jan;30(1):69-72.                                                                   |     |
| NCT00551031 | Study of Inactivated, Split-Virion Influenza Vaccine and Standard Fluzone?« Vaccine in Adult and Elderly Subjects                     | Completed | No  |          |                                                                                                                               |                                                                                                               | Yes |
| NCT00553267 | Telmisartan/Amlodipine (80/10) vs. Telmisartan/Amlodipine (40/10) vs. amlodipine10 in Resistant Hypertension                          | Completed | Yes | 21955225 | Neldam S, Edwards C, Jones R; TEAMSTA-10 Investigators.                                                                       | Curr Med Res Opin. 2011 Nov;27(11):2145-53. Epub 2011 Sep 29.                                                 |     |
| NCT00557466 | A Dose Ranging Trial of 4 Doses of Indacaterol Delivered Via Twisthaler in Patients With Chronic Obstructive Pulmonary Disease (COPD) | Completed | No  |          |                                                                                                                               |                                                                                                               | No  |
| NCT00558064 | Filtered Trial for Amlodipine Non-responder                                                                                           | Completed | No  |          |                                                                                                                               |                                                                                                               | Yes |
| NCT00558428 | Telmisartan/Amlodipine (80/5) vs. Telmisartan/Amlodipine (40/5) vs. Amlodipine 10 or 5 in Resistant Hypertension                      | Completed | Yes | 21762357 | Neldam S, Lang M, Jones R; TEAMSTA-5 Investigators.                                                                           | J Clin Hypertens (Greenwich). 2011 Jul;13(7):459-66. doi: 10.1111/j.1751-7176.2011.00468.x. Epub 2011 Apr 22. |     |

|             |                                                                                                                                                                                                                                                        |            |     |          |                                                                                           |                                                        |     |
|-------------|--------------------------------------------------------------------------------------------------------------------------------------------------------------------------------------------------------------------------------------------------------|------------|-----|----------|-------------------------------------------------------------------------------------------|--------------------------------------------------------|-----|
| NCT00560066 | Safety of a Influenza Vaccine Produced Either in Mammalian Cell Culture or in Embryonated Hen Eggs in Adults and Elderly With and Without Underlying Medical Conditions, and Immunogenicity in a Subset of Subjects With Underlying Medical Conditions | Completed  | No  |          |                                                                                           |                                                        | No  |
| NCT00563368 | A Study Comparing Multiple Doses of VI-0521 With Placebo and Their Single-agent Constituents for Treatment of Obesity in Adults                                                                                                                        | Completed  | No  |          |                                                                                           |                                                        | Yes |
| NCT00564421 | Safety and Efficacy Study of Epinastine Nasal Spray in Subjects With Seasonal Allergic Rhinitis                                                                                                                                                        | Completed  | No  |          |                                                                                           |                                                        | No  |
| NCT00566345 | Efficacy Study of an Investigational Influenza Vaccine (Vero Cell Derived) to Prevent Culture Confirmed Influenza Infection (CCII)                                                                                                                     | Completed  | Yes | 21329971 | Barrett PN, Berezuk G, Fritsch S, Aichinger G, Hart MK, El-Amin W, Kistner O, Ehrlich HJ. | Lancet. 2011 Feb 26;377(9767):751-9. Epub 2011 Feb 15. |     |
| NCT00566527 | Comparative Study of Immunogenicity and Safety of a 2-Dose Regimen of ProQuad?« Manufactured With rHA                                                                                                                                                  | Completed  | Yes | 22406278 | Vesikari T, Becker T, Gajdos V, Fiquet A, Thomas S, Richard P, Baudin M.                  | Vaccine. 2012 Apr 26;30(20):3082-9. Epub 2012 Mar 7.   |     |
| NCT00568308 | Phase III Study of PI-88 in Post-resection Hepatocellular Carcinoma                                                                                                                                                                                    | Terminated | No  |          |                                                                                           |                                                        | No  |

|             |                                                                                                                                                                           |           |     |          |                                                                                                               |                                                            |     |
|-------------|---------------------------------------------------------------------------------------------------------------------------------------------------------------------------|-----------|-----|----------|---------------------------------------------------------------------------------------------------------------|------------------------------------------------------------|-----|
| NCT00574379 | Efficacy, Safety and PK of Once or Twice Daily Bilastine (10 or 20 mg) Compared With Placebo in the Symptomatic Treatment of SAR                                          | Completed | No  |          |                                                                                                               |                                                            | No  |
| NCT00586469 | A Randomized Study to Compare the Safety and Immunogenicity of Fluviral?« Made With New Versus Aged Bulk                                                                  | Completed | No  |          |                                                                                                               |                                                            | Yes |
| NCT00603278 | A Randomized Study To Evaluate The Efficacy And Safety Of An Investigational Drug In Adolescent And Adult Subjects With Asthma Uncontrolled on Low-Dose ICS Therapy.      | Completed | No  |          |                                                                                                               |                                                            | No  |
| NCT00603382 | A Randomized Study To Evaluate The Efficacy And Safety Of An Investigational Drug In Adolescent And Adult Subjects With Asthma Uncontrolled on Non-steroidal Therapy.     | Completed | Yes | 22342538 | Bateman ED, Bleecker ER, L ttvall J, Woodcock A, Forth R, Medley H, Davis AM, Jacques L, Haumann B, Busse WW. | Respir Med. 2012 May;106(5):642-50. Epub 2012 Feb 18.      |     |
| NCT00603746 | A Randomized Study To Evaluate The Efficacy And Safety Of An Investigational Drug In Adolescent And Adult Subjects With Asthma Uncontrolled on Moderate-Dose ICS Therapy. | Completed | Yes | 21828231 | Busse WW, Bleecker ER, Bateman ED, L ttvall J, Forth R, Davis AM, Jacques L, Haumann B, Woodcock A.           | Thorax. 2012 Jan;67(1):35-41. Epub 2011 Aug 9.             |     |
| NCT00606684 | A Study To Assess Efficacy And Safety Of Different Doses Of                                                                                                               | Completed | Yes | 22241764 | Hanania NA, Feldman G, Zachgo W, Shim JJ, Crim C, Sanford L, Lettis S, Barnhart F,                            | Chest. 2012 Jul;142(1):119-27. doi: 10.1378/chest.11-2231. |     |

|             |                                                                                                                                          |                        |     |          |                                                                                                                                                                                                    |                                                                                                                              |     |
|-------------|------------------------------------------------------------------------------------------------------------------------------------------|------------------------|-----|----------|----------------------------------------------------------------------------------------------------------------------------------------------------------------------------------------------------|------------------------------------------------------------------------------------------------------------------------------|-----|
|             | GW642444 In Subjects With Chronic Obstructive Pulmonary Disease (COPD)                                                                   |                        |     |          | Haumann B.                                                                                                                                                                                         |                                                                                                                              |     |
| NCT00613938 | A Study to Evaluate the Effectiveness and Safety of Tapentadol (CG5503) in the Treatment of Acute Pain From Bunionectomy.                | Completed              | Yes | 19445652 | Daniels S, Casson E, Stegmann JU, Oh C, Okamoto A, Rauschkolb C, Upmalis D.                                                                                                                        | Curr Med Res Opin. 2009 Jun;25(6):1551-61. Erratum in: Curr Med Res Opin. 2009 Jun;25(6):1561. Dosage error in article text. |     |
| NCT00616928 | Immunogenicity & Safety of GSK's Influenza Vaccine 1557484A Given to Adults Aged ≥18 Years                                               | Completed              | Yes | 21606531 | Langley JM, Risi G, Caldwell M, Gilderman L, Berwald B, Fogarty C, Poling T, Riff D, Baron M, Frenette L, Sheldon E, Collins H, Shepard M, Dionne M, Brune D, Ferguson L, Vaughn D, Li P, Fries L. | J Infect Dis. 2011 Jun 15;203(12):1729-38.                                                                                   |     |
| NCT00621959 | A Study Evaluating the Efficacy and Impact on Health-related Quality of Life of Levocetirizine in Adults With Seasonal Allergic Rhinitis | Completed              | Yes | 20350147 | Mansfield LE, Hampel F, Haeusler JM, Georges G.                                                                                                                                                    | Curr Med Res Opin. 2010 Jun;26(6):1269-75.                                                                                   |     |
| NCT00633074 | Non-inferiority Study of GSK Biologicals' Influenza Vaccine GSK576389A Using Different Formulations                                      | Completed              | No  |          |                                                                                                                                                                                                    |                                                                                                                              | Yes |
| NCT00636363 | Safety and Efficacy of a Bausch & Lomb Multipurpose Solution When Compared to Ciba Vision Aquify Multipurpose Solution                   | Completed              | No  |          |                                                                                                                                                                                                    |                                                                                                                              | Yes |
| NCT00640341 | Comparative Performance of PureVision, Acuvue Oasys and O2Optix                                                                          | Completed              | No  |          |                                                                                                                                                                                                    |                                                                                                                              | Yes |
| NCT00649701 | Novel Internet-Based Interventions to Reduce Sexual Risk                                                                                 | Active, not recruiting | Yes | 23071551 | Hirshfield S, Chiasson MA, Joseph H, Scheinmann R, Johnson WD, Remien RH, Shaw                                                                                                                     | PLoS One. 2012;7(10):e46252. doi: 10.1371/journal.pone.0046                                                                  |     |



|             |                                                                                                                                                                   |           |     |          |                                                                                                     |                                                                                                 |     |
|-------------|-------------------------------------------------------------------------------------------------------------------------------------------------------------------|-----------|-----|----------|-----------------------------------------------------------------------------------------------------|-------------------------------------------------------------------------------------------------|-----|
|             | Among Men Who Have Sex With Men                                                                                                                                   |           |     |          | FS, Emmons R, Yu G, Margolis AD.                                                                    | 252. Epub 2012 Oct 2.                                                                           |     |
| NCT00651118 | A Study to Evaluate the Safety and Effectiveness of a Nasal Spray to Treat Seasonal Allergies                                                                     | Completed | Yes | 22418065 | Carr W, Bernstein J, Lieberman P, Meltzer E, Bachert C, Price D, Munzel U, Bousquet J.              | J Allergy Clin Immunol. 2012 May;129(5):1282-1289.e10. Epub 2012 Mar 13.                        |     |
| NCT00653224 | A Study Evaluating the Efficacy and Impact on Health-related Quality of Life of Levocetirizine in Adults With Seasonal Allergic Rhinitis                          | Completed | No  |          |                                                                                                     |                                                                                                 | Yes |
| NCT00662558 | A Six Week Study Of The Pain Relieving Effects Of Celecoxib 200 Mg Twice Daily Compared To Tramadol 50 Mg Four Times Daily In Patients With Chronic Low Back Pain | Completed | Yes | 20146877 | O'Donnell JB, Ekman EF, Spalding WM, Bhadra P, McCabe D, Berger MF.                                 | J Int Med Res. 2009 Nov-Dec;37(6):1789-802.                                                     |     |
| NCT00664664 | Subjective Study to Assess the Efficacy of APD125 in Patients With Sleep Maintenance Insomnia                                                                     | Completed | No  |          |                                                                                                     |                                                                                                 | No  |
| NCT00676052 | Dose-Ranging Study Of GSK233705B In Subjects With Chronic Obstructive Pulmonary Disease (COPD)                                                                    | Completed | Yes | 22221663 | Bateman E, Feldman G, Kilbride S, Brooks J, Mehta R, Harris S, Maden C, Crater G.                   | Clin Respir J. 2012 Jan 5. doi: 10.1111/j.1752-699X.2012.00278.x. [Epub ahead of print]         |     |
| NCT00677274 | Epidural Analgesia in Different Cervix Diameter and the Rate of Cesarean Delivery                                                                                 | Completed | No  |          |                                                                                                     |                                                                                                 | No  |
| NCT00684671 | Evaluation of Immune Memory to Twinrix or Comparator by Challenge Dose Administration 4                                                                           | Completed | Yes | 21366801 | Chlibek R, von Sonnenburg F, Van Damme P, Smetana J, Tichy P, Gunapalaiah B, Leyssen M, Jacquet JM. | J Travel Med. 2011 Mar-Apr;18(2):145-8. doi: 10.1111/j.1708-8305.2010.00499.x. Epub 2011 Feb 7. |     |

|             |                                                                                                                                                |            |     |          |                                                                                                                                 |                                                                                   |     |
|-------------|------------------------------------------------------------------------------------------------------------------------------------------------|------------|-----|----------|---------------------------------------------------------------------------------------------------------------------------------|-----------------------------------------------------------------------------------|-----|
|             | Years After Primary Vaccination                                                                                                                |            |     |          |                                                                                                                                 |                                                                                   |     |
| NCT00707733 | Phase 3 Study of the Safety and Efficacy of Ritonavir-Boosted Elvitegravir (EVG/r) Versus Raltegravir (RAL)                                    | Terminated | Yes | 22015077 | Molina JM, Lamarca A, Andrade-Villanueva J, Clotet B, Clumeck N, Liu YP, Zhong L, Margot N, Cheng AK, Chuck SL; Study 145 Team. | Lancet Infect Dis. 2012 Jan;12(1):27-35. Epub 2011 Oct 18.                        |     |
| NCT00740792 | A Study Evaluating the Safety and Effectiveness of a Nasal Spray to Treat Seasonal Allergies                                                   | Completed  | Yes | 22418065 | Carr W, Bernstein J, Lieberman P, Meltzer E, Bachert C, Price D, Munzel U, Bousquet J.                                          | J Allergy Clin Immunol. 2012 May;129(5):1282-1289.e10. Epub 2012 Mar 13.          |     |
| NCT00754689 | Study of Rimonabant/Metformin Combinations to Investigate Diabetes (Blood Sugar) Control in Patients With Type 2 Diabetes                      | Terminated | No  |          |                                                                                                                                 |                                                                                   | No  |
| NCT00754988 | A Study of Taspoglutide Versus Sitagliptin for the Treatment of Patients With Type 2 Diabetes Mellitus Inadequately Controlled With Metformin. | Completed  | Yes | 23138449 | Bergental RM, Forti A, Chiasson JL, Woloschak M, Boldrin M, Balena R.                                                           | Diabetes Ther. 2012 Dec;3(1):13. doi: 10.1007/s13300-012-0013-8. Epub 2012 Nov 9. |     |
| NCT00763269 | The Efficacy of a Toothpaste to Reduce Sensitivity                                                                                             | Completed  | No  |          |                                                                                                                                 |                                                                                   | Yes |
| NCT00852371 | Intermittent Preventive Treatment of Malaria in Schoolchildren                                                                                 | Completed  | Yes | 20976051 | Nankabirwa J, Cundill B, Clarke S, Kabatereine N, Rosenthal PJ, Dorsey G, Brooker S, Staedke SG.                                | PLoS One. 2010 Oct 19;5(10):e13438.                                               |     |
